# Supplementary material for: Earth's radiation belts ions: Patterns of the spatial-energy structure and its solar-cyclic variations
Source: Copernicus journal article supplement (doi:10.5194/angeo-2019-152), 2019-11-07
Supplement: Supplementary file [file angeo-2019-152-AC1-supplement.pdf]

1 **Earth's radiation belts ions: patterns of the spatial-energy structure**  
2 **and its solar-cyclic variations**

3 **Alexander S. Kovtyukh**

4 Skobeltsyn Institute of Nuclear Physics, Moscow State University, Moscow, 119234, Russia;  
5 kovtyukhas@mail.ru

6 **Abstract** Spatial-energy distributions of the stationary fluxes of protons, helium ~~ions~~ and ions  
7 of carbon-nitrogen-oxygen (CNO) group, with energy from  $E \sim 100$  keV to 200 MeV, in the  
8 Earth's radiation belts (ERB), at  $L \sim 1-8$ , are considered here ~~by the using~~ data ~~of the from~~  
9 satellites ~~for in the period~~ 1961–2017. It ~~is find~~ has been found that the results of these  
10 measurements line up in the space  $\{E, L\}$  ~~by following~~ some regular patterns. Solar-cyclic (11-  
11 year) variations in the distributions of protons, helium ~~ions~~ and CNO group ions fluxes in the  
12 ERB are studied. It has been observed that in the inner regions of the ERB, ~~the ions ion~~ fluxes  
13 decrease with increasing solar activity. ~~It is find and that~~ the solar-cyclic variations of fluxes ~~for~~  
14 ~~ions with~~ of  $Z \geq 2$  ions are much greater than for protons; moreover, it seems that they ~~and~~  
15 increase with increasing ~~an~~ atomic number  $Z$  ~~of the ions~~. ~~The~~ Finally, the possible physical  
16 mechanisms leading to formation of this spatial-energy structure and to the solar-cyclic  
17 variations of the ERB ion fluxes are discussed.

18  
19 **Keywords.** Magnetospheric physics (energetic particles, trapped). Radiation belts.  
20

## 21 1 Introduction

22 ~~The Earth's radiation belts (ERB)~~ The ERB consist mainly of charged particles with energy from  $E$   
23  $\sim 100$  keV to several hundreds of megaelectronvolt (MeV). These particles are trapped by the  
24 geomagnetic field at altitudes from  $\sim 200$  kilometers to  $\sim 50\text{--}70$  thousands kilometers. The ERB is  
25 consisted mainly from electrons and protons. In the ERB there are also ~~ions of~~ helium nuclei and  
26 ~~other  $Z > 2$  ions (like oxygen etc), oxygen, and other elements with the atomic number  $Z \geq 2$ ,~~  
27 where  $Z$  is the charge of the atomic nucleus with respect to the charge of the proton. During  
28 geomagnetic disturbances, ion fluxes, and ~~its~~ their distributions are ~~varied~~ changed. These fluxes  
29 depend also on the phase of the solar cycle, conditions in the interplanetary space, and other  
30 factors.

31 Particles with different energy  $E$  and pitch angles  $\alpha$  ( $\alpha$  is the angle between ~~a~~ the local vector of  
32 the magnetic field and the vector of a particle velocity), which are injected into some point of the  
33 geomagnetic trap, are drifted with conserving the adiabatic invariants ( $\mu$ ,  $K$ ,  $\Phi$ ) and populate a  
34 narrow layer surrounding the Earth (Alfvén and Fälthammar, 1963; Northrop, 1963). This layer  
35 called the drift shell. Therefore, experimental data on the ERB ~~do most simply~~ are often  
36 represented in coordinates  $\{L, B\}$ , where  $L$  is ~~parameter of a drift shell~~ the drift shell parameter and  
37  $B$  is ~~a~~ the local induction of the magnetic field (McIlwain, 1961). For the dipole magnetic field  $L$  is  
38 a distance, in the equatorial plane, from the given magnetic field line to the center of the dipole  
39 itself (in the Earth's radii  $R_E$ ).

40 The stationary fluxes  $J$  of the ERB particles with given energy and pitch angle  $\alpha$  are decreased  
41 usually when the point of observation is shifted from the equatorial plane to ~~a~~ higher latitudes  
42 along certain magnetic field line (if we exclude the peripheral regions of the geomagnetic trap,  
43 where the drift shells of the captured particles are split and branched). This dependence of the  
44 particle fluxes is described by the functions  $J(B/B_0)$ , where  $B$  and  $B_0$  are values of the magnetic field  
45 at the point of observation and in the equatorial plane on the same magnetic field line respectively.

46 Outer and inner regions of the ERB are maintained in the dynamic equilibrium with the  
47 environment by the different mechanisms (see review Kovtyukh, 2018).

48 The outer belt ( $L > 3.5$ ) ~~of ions~~ is formed mainly by the mechanisms of the radial diffusion of  
49 ~~these such~~ ions ~~to~~ towards the Earth under the action of fluctuations of ~~an~~ both electric and  
50 magnetic fields resonating with ~~a~~ their drift periods ~~of these ions~~. This transport is accompanied by  
51 the betatron acceleration ~~of ions~~ and by the ionization losses of the ions ~~in~~ as a result of their  
52 interactions with the plasmasphere and with residual atmosphere.

53 The inner belt ( $L < 2.5$ ) of protons with  $E > 10$  MeV ~~is~~ was formed mainly as a result of decay  
54 of neutrons knocked from the nuclei of the atmospheric atoms by the Galactic Cosmic Rays  
55 (GCR). For protons with  $E < 10$  MeV this mechanism (CRAND) is supplemented by the radial  
56 diffusion of particles from the outer to the inner belt. The inner belt of ions with  $Z > 4$  was formed  
57 mainly from the ions of the Anomalous component of Cosmic Rays (ACR).

58 In the intermediate region ( $2.5 < L < 3.5$ ) is operated also the mechanism of ~~a~~ ion capture ~~of the~~  
59 ~~ions~~ from the Solar Cosmic Rays (SCR) takes place during strong magnetic storms (see, e.g.,  
60 Selesnick et al., 2014).

61 Thus, the main mechanisms of formation of the ERB, together with the sources of injection and  
62 losses of the ions, are known. However, for the comprehensive verification of the physical models  
63 and to ~~identification~~ identify of the mathematical models and their parameters, the formulation of  
64 sufficiently complete and reliable empirical models of the ERB for each of the ion components, ~~it~~  
65 is necessary; it is also necessary ~~also~~ for ensuring the safety of space flights.

66 These models can be created only ~~on a basis of the~~ using experimental data, are obtained over  
67 many years and decades; such models (see, e.g., Ginet et al., 2013) were already created for  
68 protons (AP8/AP9). ~~These models and they~~ are widely used in the space research. ~~However,~~ On  
69 the contrary, measurements of ~~fluxes of the ions with  $Z \geq 2$~~  ion fluxes are represented a difficult

suffer from technical problems due to a small fluxes of these ions statistics and high background fluxes of protons and electrons. For this reasons, empirical and semi-empirical models of the ERB developed for ions with  $Z \geq 2$  ions, are applicable only to very limited regions of the space  $\{E, L\}$ .

~~There are problems connected with limited and incomplete information on the fluxes of ions with  $Z \geq 2$  in the ERB, especially in the energy range from tens to hundreds of megaelectronvolt.~~ One of the main problems of this work is to consider the possibility to create a sufficiently complete and reliable empirical models of the ERB for these ions based on currently available experimental data.

In the following sections, ~~are considered~~ the spatial-energy structure of the ERB in the spaces  $\{E, L\}$  for protons, helium ions and ~~of the~~ CNO group ions on the experimental data (Sect. 2) together with the possible physical mechanisms of formation of these structures and its solar-cyclic variations (Sect. 3) are ~~discussed~~ considered, and the main conclusions of this work are given (Sect. 4).

## 2 Spatial-energy distributions of the ion fluxes near the equatorial plane

There can be ions trapped ~~on the in~~ drift shells only ions with energies less than some maximum values, determined by the Alfvén's criterion:  $\rho_i(L, E, M_i, Q_i) \ll R_c(L)$ , where  $\rho_i$  is the gyroradii gyroradius of ions, and  $R_c$  is the radius of curvature of the magnetic field near the equatorial plane ( $M_i$  and  $Q_i$  are mass and charge of ions with respect to the corresponding values for protons). According to this criterion and the theory of stochastic motion of particles, the geomagnetic trap can capture and durably hold only ions with  $E$  (MeV)  $< 2000 \times (Q_i^2/M_i) L^{-4}$  (Ilyin et al., 1984). The green line in Figs 1-6 ~~is present~~ represents this boundary ~~on Figs. 1-6~~.

When comparing the data of various experiments in the ERB, the question arises about the compatibility of these results with each other and the reasons for their discrepancies. More or less significant discrepancies in the results of the satellites can be connected with the differences in ~~the their~~ trajectories ~~of the satellites~~; in the construction of the instruments and their angular characteristics; in the energy ranges and sets of ~~the~~ energy channels. For the stationary ERB, these discrepancies can also be associated with differences in the general state of the ~~Solar Sun~~, heliosphere and magnetosphere of the Earth ~~at the different measurements~~ during various periods of data-taking. These factors influence ~~on~~ the fluxes of ions with  $Z \geq 2$  in the ERB more significantly ~~than on the with respect to~~ proton fluxes (see, e.g., Kovtyukh, 2018).

~~This In this~~ section, ~~used~~ experimental data of various satellites, which were obtained for quiet periods ( $K_p < 2$ ) and near the equatorial plane Of the ERB for ions with equatorial pitch angles  $\alpha_0 \approx 90^\circ$  ~~have been used. The preference was given to the averaged results of these satellites for quiet periods. All values of differential fluxes reduced to one dimension.~~ In the regions of  $E$  and  $L$  shells, where these data were obtained, the ion fluxes ~~do are~~ not distorted by the background of other particles.

In many important experiments, the instruments ~~did not allow were not able to~~ separate fluxes of ions by ~~their~~ charge of ions. ~~For Moreover, for the~~ ions of the CNO group, the separation by mass ~~also~~ are not ~~performing usually usually~~ performed. For heavier ions species, for example for Fe ions, we have very smaller ~~such~~ data-sets. Therefore, this work presents ~~only data on~~ helium ions (without any charge separating ~~them by charge~~) and ~~ions of~~ CNO ions group (without any mass or charge separation ~~them by mass and charge~~).

To solve the ~~mentioned~~ problems ~~considered here~~, it is important to choose the form of representation (space of variables), in which the results of ~~different the single~~ experiments can be ~~conformed compared~~ to each other ~~naturally. For such representation of the distributions of the ion fluxes have~~ In our case, the space  $\{E, L\}$  has been used; ~~chosen the space  $\{E, L\}$ . Such representation is possible~~ this choice is very efficient to better organize ~~of a~~ fragmentary experimental data obtained in different ranges of  $E$  and  $L$  ~~most effectively~~.

119 Figures 1–6 presented here the spatial-energy distributions of the fluxes of protons, helium ions,  
120 and ions of the CNO group near the equatorial plane. These figures ~~united in pairs~~: odd figures  
121 refer to periods near the minima, and even figures refer to periods near the solar activity maxima.  
122 The values  $E$  and  $L$  in these figures are presented in logarithmic scales. ~~Statistical and methodical~~  
123 ~~errors of the experimentalal points on these figures do not exceed of the size of these points. These~~  
124 ~~points are~~ connected by lines of the equal intensity of ion fluxes (iso-lines); the decimal logarithms  
125 of the fluxes  $J$ , in unit of  $(\text{cm}^2 \text{ s ster MeV/n})^{-1}$ , are shown near each iso-lines. ~~The ion fluxes  $J$~~   
126 ~~have a dimension  $(\text{cm}^2 \text{ s ster MeV/n})^{-1}$  and are corresponded to the energies  $E$  (MeV/n) and an~~  
127 ~~equatorial pitch angle of  $\alpha_0$  is  $\sim 90^\circ$ .~~

128 Such representations of the experimental data are not only visual, but also ~~are~~ very convenient  
129 and rather universal. Obviously, Figs. 1–6 actually show both radial profiles of the fluxes of ions  
130 for a given energy (~~if one see along the abscissa axis~~) and ion energy spectra for a given  $L$  shell (~~if~~  
131 ~~one see along the ordinate axis~~).

132 In this place, it is need to say a few words about the method of constructing these figures. The  
133 points in Figs. 1–6 ~~are have been~~ obtained from the ~~dependences~~ radial profiles of fluxes  $J(L)$  for a  
134 ~~given ions with a certain energy~~ (the average energies of the ions ~~for each~~ in the channels of the  
135 instruments) ~~and with an equatorial pitch angle close to  $90^\circ$~~ . Unlike ~~a distributions of electrons, as~~  
136 ~~well as ion distributions connected with magnetic disturbances~~ electron fluxes or ion fluxes  
137 measured during geo-active conditions, ~~the dependences~~ the ion fluxes considered here (i.e. during  
138 quiet periods), for the ERB ions ~~with  $\alpha_0 \sim 90^\circ$~~  usually have only one maximum ~~in a quiet time~~  
139 ~~in the functions  $J(L)$~~ . As a result, for each experiment, 1 or 2 points were obtained (on the outer and  
140 inner edges of these profiles) with certain values of  $E$  and  $L$  for a given level of ~~stationary~~ ion  
141 fluxes. Sometimes, especially for low ~~levels of~~ fluxes, only one point was obtained: in these cases,  
142 the radial profile of the ion fluxes was cutoff at small values of  $L$  ~~by due to~~ a significant  
143 background of ~~other contaminating~~ particles. ~~In these cases, and no interpolations and/~~  
144 ~~extrapolations of the radial profiles of ion fluxes does performing here has been performed~~  
145 ~~whatsoever~~.

146 Each iso-line, shown in these figures, ~~was built has been evaluated~~ separately, ~~for~~ from the  
147 corresponding set of experimental points (icons); after that this iso-line was transferred (along with  
148 the icons) to the corresponding figure. ~~Thus, ; thus, in the region more~~ abundantly populated  
149 ~~sectors of the plots by such icons~~ (i.e. for protons with  $E > 1$  MeV at  $L > 2$ ) ~~they~~ such iso-lines are  
150 mixing in Figs. 1–2. In ~~the cases~~ of a large distances between neighboring points, the  
151 corresponding segments of the iso-lines are shown ~~in dotted as dashed arcs in these figures~~.

152 The radial profiles of the differential fluxes  $J(L)$  ~~shown on uniform presentation for of~~ particles  
153 ~~of with different energies energy are tend to~~ intersect with each other in those regions where the  
154 energy spectra ~~of these fluxes are have a present some~~ local maximum or minimum. ~~In contrast,~~  
155 ~~On the contrary,~~ the ~~flux~~ iso-lines cannot intersect ~~with~~ each other: ~~because~~ this would mean that,  
156 at the same point in the space  $\{E, L\}$ , the ion fluxes differ very significantly (by an order of  
157 magnitude ~~for the flux step selected here~~). Such uncertainty does not have a physical sense and  
158 ~~means a complete discrepancy and contradiction to each other of two close series of data obtained~~  
159 ~~in different experiments. In this case,~~ a special analysis is needed to identify ~~all the errors and~~  
160 ~~differences in the conditions for different measurements, in order to reconcile them with each other~~  
161 ~~other possible sources of~~ errors.

162 ~~The largest errors of our method are connected with drawing iso lines of fluxes along~~  
163 ~~heterogeneous sets of experimental points (the errors of these points themselves do not exceed of~~  
164 ~~the size of the icons on Figs. 1–6). This uncertainty of our work is open for constructive criticism,~~  
165 ~~and these figures themselves are open for possible corrections and additions.~~

166 ~~The synthesis of the experimental data on the fluxes of ERB ions in other representations (in~~  
167 ~~other spaces of variables) leads~~ For example, one can present ion fluxes obtained in various  
168 experiments for different energy channels depending on  $L$  (radial profiles of fluxes). However, the

169 ~~sets of these channels are different in different experiments. To compare the radial profiles of ion~~  
170 ~~fluxes for different experiments, it is necessary to bring these fluxes to the same set of energy~~  
171 ~~values. This can be made by energy spectra, but due to discreteness of these spectra, the procedures of~~  
172 ~~their approximation, interpolation, and extrapolation are inevitable. But this work can be done in~~  
173 ~~different ways. With that, methodical errors and uncertainties in the final picture acquire a hidden~~  
174 ~~form. They can be tracked only if consistently, step by step, repeating all these procedures for the~~  
175 ~~experimental data.~~

176 Representing plots in a different space of variables would lead only to more significant  
177 methodological errors and uncertainties, because of the natural differences in the instrumentation  
178 of the experiments taken into account; thus, a series of approximations or  
179 interpolation/extrapolation techniques would become inevitable.

## 180 2.1 Spatial-energy structure of the proton fluxes

181 There is a ~~great quantity~~ large number of ~~the~~ experimental data ~~on the concerning~~ ERB protons.  
182 ~~The ; the~~ most important of them are presented ~~in the space  $\{E, L\}$  on~~ in Figs. 1 and 2. These  
183 figures ~~are needed here for~~ serve as a comparison with similar distributions of ~~ions with  $Z \geq 2$  ions~~  
184 ~~(on the~~ Figs. 3–6).

185 Figure 1 represents ~~a results of from~~ the satellites Relay-1 (Freden et al., 1965); Ohzora or EXIS  
186 C: Exospheric Satellite C, Akebono or EXOS-D: Exospheric Satellite D and ETS-VI: Engineering  
187 Test Satellite (Goka et al., 1999). These results ~~were obtained near minima~~ have been collected  
188 ~~during minimum periods of various solar cycles, i.e.~~ between 19<sup>th</sup> and 20<sup>th</sup> (1963), 21<sup>th</sup> and 22<sup>th</sup>  
189 (1984–1985), and 22<sup>th</sup> and 23<sup>th</sup> (1994–1996) of the solar activity cycles.

190 Figure 2 represents ~~a results of from~~ the satellites 1968-81A (Stevens et al., 1970), Injun-5 or  
191 Explorer-40 (Krimigis, 1970; Venkatesan and Krimigis, 1971; Pizzella and Randall, 1971), 1969-  
192 025C or OV1-19: Orbiting Vehicle 1-19 (Croley et al., 1976), Azur or GRS A: German Research  
193 Satellite A (Hovestadt et al., 1972; Westphalen and Spjeldvik, 1982), Molniya-1 (Panasyuk and  
194 Sosnovets, 1973), GEOS-2: Geodetic Earth Orbiting Satellite 2 (Wilken et al., 1986), CRRES: The  
195 Combined Release and Radiation Effects Satellite (Albert et al., 1998; Vacaresse et al., 1999), GEO-  
196 3: Geostationary Orbit 3 (Selesnick et al., 2010) and Van Allen Probes (Selesnick et al., 2014,  
197 2018). These results were obtained ~~near maxima during maximum periods of solar activity in~~  
198 ~~cycles: 20<sup>th</sup> (1968–1971), 22<sup>th</sup> (1990–1991), 23<sup>th</sup> (2000), and 24<sup>th</sup> (2012–2017)~~ solar cycles.

199 The data of the satellites Explorer-45 (Fritz and Spjeldvik, 1979, 1981) and ISEE-1:  
200 International Sun-Earth Explorer 1 or Explorer-56 (Williams, 1981; Williams and Frank, 1984) are  
201 given in ~~both~~ Figs. 1 and 2 ~~at  $L > 2.5$  where~~ because solar-cyclic variations of the ERB proton  
202 fluxes are ~~practically do not observed~~ negligible at  $L > 2.5$  (see, e.g., Vacaresse et al., 1999).

203 ~~Other experimental data on the ERB protons could be added to these results, but they do not~~  
204 ~~change the general picture shown in Figs. 1 and 2.~~

205 From a comparison of Figs. 1 and 2 one can see that at  $L < 2.5$  (especially at  $L < 1.4$ ) the proton  
206 fluxes ~~in the minima of~~ during solar activity minima (Fig. 1) are higher than ~~in the~~ during maxima  
207 ~~of solar activity~~ (Fig. 2). In addition, in the ~~minima of solar activity~~ former the inner edge of the  
208 proton belt is less steep and ~~achieve it can reach~~ smaller  $L$  shells (for  $E > 1$  MeV). The  
209 distributions ~~functions~~ of protons  ~~$f(\mu, K, L)$~~  in the ~~phase~~ space  $\{\mu, L\}$  (see, e.g.,  
210 Kovtyukh, (2016a,b) which I constructed from Figs. 1 and 2 confirm these conclusions.

211 In Figs. 1 and 2, the iso-lines of proton fluxes are almost parallel to each other on  $L > 3$  at  
212 sufficiently high energies. Since these iso-lines have separated from each other by approximately  
213 equal intervals on a logarithmic scale of the energy, this region in the space  $\{E, L\}$  corresponds to  
214 power-law spectra of the ERB protons: ~~for power-law spectra,  $J \propto E^{-\gamma}$ , index  $\gamma = -\Delta(\log J)/\Delta(\log E)$ .~~  
215 In these figures, this region is located between the green and red lines.

216 The red line ~~is corresponded~~ corresponds to the lower boundary ( $E_b$ ) of the power-law tail of the  
217 proton spectra. For this line,  $E_b \sim 36 \times L^{-3}$  MeV. Some changes in the slope of these iso-lines at  $L >$



218 6 can be connected ~~with an essential distinction of the~~ to a discrepancy between the real  
219 configuration of the magnetic field lines of the magnetic field ~~in this region from the dipole and the~~  
220 dipolar configuration (~~the used here for  $L$  shells calculation were calculated for a dipole field~~).

221 For the dipole magnetic field region, the points on the red line correspond to particles with a  
222 specific value of the 1<sup>st</sup> adiabatic invariant of motion ( $\mu_b$ ). For Figs. 1 and 2, the average value  $\mu_b$   
223 is  $\sim 1.16$  keV nT<sup>-1</sup>. Segments of an iso-lines that are parallel to the red line also correspond to a  
224 certain values of the invariant  $\mu$ . In this region of the space  $\{E, L\}$  the ionization and other losses  
225 of the ERB protons during radial drift can be neglected, and ~~the fluxes~~ changes of fluxes  
226 with changing of  $L$  are practically reduced to adiabatic transformations ~~the fluxes~~ in a magnetic field.

227 It is results from these figures that at  $L = 3-6$  the value  $\gamma = 4.8 \pm 0.5$ . At  $L > 6$  the distances  
228 between these iso-lines are increased with  $L$ , and the value  $\gamma$  is decreased from  $\sim 4.7-5.0$  at  $L = 6$   
229 to  $\sim 4.1-4.5$  at  $L = 8$ . This is due to the deviation of the magnetic field from the dipole  
230 configuration as well as to the increasing variability of this field with increasing  $L$ .

231 According to the data of satellites considered in (Kovtyukh, 2001), invariant parameters  $\mu_b$  and  $\gamma$   
232 were found only at  $L > 3$ . In this work, ~~is considered the~~ a wider range of  $L$  and  $E$  is considered, and  
233 for protons with  $E > 10$  MeV these parameters can be traced to  $L \sim 2$ . At  $L = 2$ ,  $\gamma = 4.4 \pm 0.6$  (Fig. 1)  
234 and  $\gamma = 4.7 \pm 1.3$  (Fig. 2). This is due to the fact that the energy range here is significantly extended  
235 toward higher energies values (up to 200 MeV), but ~~with increasing the energy of the ERB protons~~  
236 here the ionization losses ~~are decreased rapidly~~ for protons rapidly decrease (see, e.g., Schulz and  
237 Lanzerotti, 1974; Kovtyukh, 2016a).

## 238 2.2 Spatial-energy structure of the helium ion fluxes

239 In Figs. 3 and 4 ~~are presented~~ helium ions fluxes averaged for quiet periods ( $Kp < 2$ ) ~~are presented~~.

240 Figure 3 represents ~~the data of results from~~ the satellites Molnija-2 (Panasyuk et al., 1977),  
241 Prognoz-5 (Lutsenko and Nikolaeva, 1978), ISEE-1: The International Sun-Earth Explorer 1  
242 (Hovestadt et al., 1981); Akebono or EXOS-D: Exospheric Satellite D and ETS-VI: Engineering Test  
243 Satellite (Goka et al., 1999). These results ~~were obtained near minima~~ have been collected during  
244 minimum periods of various solar cycles, i.e. between 20<sup>th</sup> and 21<sup>th</sup> (1975–1977), between 21<sup>th</sup> and  
245 22<sup>th</sup> (1984–1985), and between 22<sup>th</sup> and 23<sup>th</sup> (1994–1996) of the solar activity cycles.

246 Figure 4 represents ~~the data of results from~~ the satellites OV1-19: Orbiting Vehicle 1-19 (Blake  
247 et al., 1973; Fennell and Blake, 1976), Explorer-45 (Fritz and Spjeldvik, 1978, 1979; Spjeldvik and  
248 Fritz, 1981), SCATHA: Spacecraft Charging At High Altitudes (Blake and Fennell, 1981; Chenette  
249 et al., 1984). These results were obtained ~~near maxima during maximum periods~~ of solar activity in  
250 cycles: 20<sup>th</sup> (1968–1971) and 21<sup>th</sup> (1979) solar cycles.

251 From a comparison of Figs. 1–2 with Figs. 3–4 one can see that at  $L > 2$  for helium ions the  
252 solar-cyclic (11-year) variations are greater than for protons. For example, at  $L \sim 2-3$  from  
253 maximum to minimum of solar activity fluxes of protons with  $E > 1$  MeV practically do not  
254 changed, and the fluxes of helium ions with  $E > 1$  MeV/n are increased by one order of magnitude.

255 Figures 3 and 4 have the same patterns ~~are observed~~ as for protons, but the distribution of  
256 helium ion fluxes is slightly shifted ~~away from the Earth~~ towards higher values of  $L$  shell (with  
257 respect to protons). Unlike protons, there are significant “white spots” in these figures: ~~for helium~~  
258 ~~ions in this picture~~ no experimental data for helium ions in these regions.

259 The red line on these figures is corresponded to the lower boundary of the power-law tail of the  
260 helium ions spectra. For this line,  $E_b/M_i \sim 43.4 \times L^{-3}$  MeV/n (Fig. 3) and  $E_b/M_i \sim 21.7 \times L^{-3}$  MeV/n  
261 (Fig. 4). If one takes into account that at  $L < 6$  for helium ions with  $E > 0.2$  MeV/n the average  
262 charge  $Q_i = +2$  (see, e.g., Spjeldvik, 1979), then for the considered boundary we get:  $\mu_b \sim 1.4 \times Q_i$   
263 keV/n  $\times$  nT<sup>-1</sup> at the maximum of solar activity and  $\mu_b \sim 1.4 \times M_i$  keV/n  $\times$  nT<sup>-1</sup> at the minimum of solar  
264 activity (for the dipole magnetic field region). The iso-lines of helium ion fluxes in Figs. 3 and 4,  
265 which pass above the red line at  $L > 2.5$ , are corresponded to an average value of  $\gamma \sim 5.5$ .

266 For helium ions spectra, as for protons ones, the values of the parameters of the power-law tail  
267 ~~of their spectra are approximately in the middle of the ranges of these parameters, which were~~  
268 ~~obtained by other methods~~ are in good agreement with what has been found in (Kovtyukh, 2001).

269 At the same time, one can see that the iso-lines of the fluxes of helium ions in the region above  
270 the red line (in the region of power-law spectra) ~~have at a~~ substantial deviate from the slope ~~to~~ of  
271 the red line. At  $L > 3$  the fluxes of helium ions with given energy are increased with decreasing  $L$   
272 ~~more slowly~~ slower than follows expected from adiabatic transformations ~~of the fluxes~~ (see  
273 Kovtyukh, 2001). This means that the ionization losses of the ERB helium ions significantly  
274 exceed these losses for protons, in agreement ~~in accordance~~ to well-known calculations (see, e.g.,  
275 Schulz and Lanzerotti, 1974), ~~this is means that the ionization losses of the ERB helium ions~~  
276 ~~significantly exceed these losses for protons.~~

### 277 2.3 Spatial-energy structure of the CNO group ions fluxes

278 In Figs. 5 and 6 ~~are presented~~ CNO group ions fluxes averaged for quiet periods ( $Kp < 2$ ) ~~are~~  
279 ~~presented~~.

280 Figure 5 represents ~~the data of results from~~ the satellites ATS-6: Applications Technology  
281 Satellite 6 (Spjeldvik and Fritz, 1978; Fritz and Spjeldvik, 1981) and ISEE-1: The International  
282 Sun-Earth Explorer 1 (Hovestadt et al., 1978). These results ~~were obtained near the minimum~~ ~~have~~  
283 ~~been collected during minimum period~~ between 20<sup>th</sup> and 21<sup>th</sup> of the solar activity cycles (1974–  
284 1975, 1977).

285 Figure 6 represents ~~the data of results from~~ the satellite Explorer-45 (Spjeldvik and Fritz, 1978;  
286 Fritz and Spjeldvik, 1981). These results were obtained ~~near the~~ during maximum period of solar  
287 activity in 20<sup>th</sup> solar cycle (1971–1972).

288 On Figs. 5–6 the spatial-energy patterns of the ion fluxes ~~for of~~ the CNO group ions are even  
289 more shifted ~~away from the Earth~~ towards higher values of  $L$  shell and its configuration differ  
290 significantly from ~~the~~ Figs. 1–4.

291 From a comparison of Figs. 1–2 with Figs. 5–6 one can see that for ions of CNO group the  
292 solar-cyclic (11-year) variations are greater than for protons. For example, at  $L \sim 3-5$  from  
293 maximum to minimum of solar activity fluxes of protons with  $E > 1$  MeV practically do not  
294 changed, but the fluxes of the CNO group ions ~~are~~ increase by one order of magnitude ~~and or~~  
295 more. From a comparison of Figs. 3–4 with Figs. 5–6 it is seen also that the fluxes of CNO group  
296 ~~ions varies by change~~ several times ~~greater more~~ than the fluxes of helium ions ~~do~~.

297 This ~~is~~ means that for ions of the CNO group the ionization losses at  $L = 3-5$  are much larger  
298 than for ions with  $Z \leq 2$  and these losses have a significant effect even on the power-law segment  
299 of the spectra of the CNO ions (in the part which is seen on Figs. 5–6). Therefore, the lower  
300 boundary of the power-law tail of these ions spectra ~~have~~ not monitored on the data given in Figs.  
301 5 and 6. The red line on these figures ~~is rather arbitrary: it~~ corresponds to adiabatic laws (see  
302 Kovtyukh, 2001); ~~that are not performed here, but~~ this line let us ~~to trace~~ estimate the deviations  
303 from these laws. As can be seen from Fig. 5–6, ionization losses for ions of the CNO group are  
304 especially large at the maximum of solar activity (Fig. 6): in these times the slope of iso-lines on  $L$   
305  $> 3$  is significantly less than the slope of the red line.

306 At the same time, at  $L > 4$  in Fig. 5 and at  $L > 3$  in Fig. 6 the iso-lines of fluxes pass almost  
307 parallel to each other and at approximately equal distances from each other; the average value of  $\gamma$   
308 corresponding to them is  $\sim 6$ . Thus, for sufficiently large values of  $E$  and  $L$ , the CNO group ions  
309 spectra in the ERB have a power-law form, but these spectra are softer in comparison with the  
310 spectra of protons.

311 The red line corresponds here to the dependences  $E_b/M_i \approx 43.4 \times L^{-3}$  MeV/n (on Fig. 5) and  $E_b/M_i$   
312  $\sim 12.4 \times L^{-3}$  MeV/n (on Fig. 6), which are taken from (Kovtyukh, 2001) where this boundary was  
313 more clearly defined also for the ions of the CNO group. If one takes into account that at  $L \sim 3-5$   
314 for the CNO group ions with  $E > 0.1$  MeV/n the average charge  $Q_i = +4$  (see, e.g., Spjeldvik and

315 Fritz, 1978), then for this boundary one can get:  $\mu_b \sim 1.4 \times Q_i \text{ keV/n} \times \text{nT}^{-1}$  at the maximum of solar  
316 activity and  $\mu_b \sim 1.4 \times M_i \text{ keV/n} \times \text{nT}^{-1}$  at the minima of solar activity (for the dipole magnetic field  
317 region).

### 318 3 Discussion

319 Let us consider the conclusions following from the results obtained here for solar-cyclic variations  
320 in the fluxes of ERB ions. Solar-cyclic (11-year) variations of proton fluxes with  $E > 1 \text{ MeV}$  in the  
321 inner region of the ERB ~~considered have been studied~~ in many works (see, e.g., Pizzella et al.,  
322 1962; Hess, 1962; Blanchard and Hess, 1964; Filz, 1967; Nakano and Heckman, 1968; Vernov,  
323 1969; Dragt, 1971; Huston et al., 1996; Vacaresse et al., 1999; Kuznetsov et al., 2010; Qin et al.,  
324 2014). These variations ~~achieve reach~~ one order of magnitude at  $L = 1.14$  and reduce rapidly with  
325 increasing  $L$  (see, e.g., Vacaresse et al., 1999).

326 In these works, such variations of the proton fluxes of the inner belt are connected to the solar-  
327 cyclic variations of the energy loss rates of protons in this region. However, solar-cyclic variations  
328 of fluxes of ions with  $Z \geq 2$  ~~have~~ not considered in these works.

329 In quiet periods, only the mechanism of ionization losses is significant for the ERB protons  
330 trapped on small  $L$  shells (see, e.g., Schulz and Lanzerotti, 1974). Energy loss rates and lifetimes of  
331 the ERB protons are determined in this mechanism by the density of atmospheric atoms and  
332 ionospheric plasma ( $N$ ) in a geomagnetic trap. This density ~~is~~ depends on the intensity of the  
333 ultraviolet radiation of the Sun.

334 With decreasing solar activity (with a transition from maximum to minimum of the solar cycle),  
335 the densities of atmospheric atoms and ionospheric plasma in a geomagnetic trap are decreased. If  
336 the proton supply rates to the inner belt under the action of the CRAND mechanism remain  
337 unchanged or the effect of these changes is weaker than the effect connected with changes of loss  
338 rates of the protons, the stationary proton fluxes will increase ~~d~~ with decreasing the solar activity  
339 decreasing.

340 The lifetimes of protons increase with  $L$ , and ~~it lead this leads to decreasing a decrease~~ in the  
341 amplitude of the solar-cyclic variations of a proton fluxes. The proton lifetime on a given  $L$  shell  
342 depends on ~~their its~~ energy and is less than 11 years at  $L < L^*(E)$ . For example, for protons with  $E$   
343  $\sim 10 \text{ MeV}$  the value  $L^*$  is  $\sim 2.5$  (see, e.g., Kovtyukh, 2016a). Figs. 1 and 2 show that for protons  
344 the solar-cyclic variations of fluxes are small and localized at  $L < 2.5$  (mainly at  $L < 1.4$ ).

345 In contrast to protons, Figs. 3–6 show significant solar-cyclic variations of fluxes of helium ions  
346 and CNO group ions at  $L \sim 2$ –5. These variations ~~one can be explained~~ by the same mechanism;  
347 ~~which that has been~~ suggested for protons fluxes at  $L < 2.5$ .

348 For ions with  $Z \geq 2$  in the ERB, ionization losses are more significant than for protons. ~~The and~~  
349 ~~this can be connected to the~~ absence of ions with  $Z \geq 2$  at  $L < 2$  (or very low values of these fluxes)  
350 during quiet geomagnetic conditions ~~one can connect with this fact. More~~ Such short lifetimes ~~of~~  
351 ~~these ions compare to protons~~ are manifested also in the slope of the experimental curves in Fig. 4  
352 and 6 (this was note in sections 2.2 and 2.3, respectively). Consequently, for ions with  $Z \geq 2$ , the  
353 regions in which ~~the solar-cyclic~~ variations can manifested, should be located on higher  $L$  shells (at  
354 the same energies as for protons).

355 The lifetimes of ions ~~of in the~~ energies energy ranges considered here are  $\tau \propto M_i^{-1/2} Q_i^{-2} N^{-1} E^{3/2}$   
356 (Schulz and Lanzerotti, 1974). In a first approximation, for  $N \propto L^{-4}$ , we obtain the value  $L_i^* \sim$   
357  $(M_i^{1/2} Q_i^2)^{1/4} L^*$ , where  $L^*$  corresponds to protons of the same energy ~~as other ions of the other ions~~  
358 ~~under study~~. For helium ions ( $M_i = 4$ ,  $Q_i = 2$ ) with  $E \sim 10 \text{ MeV}$ , we obtain  $L_i^* \sim 4.2$ . For ions of CNO  
359 group ( $M_i = 14$ ,  $Q_i = 4$ ) with  $E \sim 10 \text{ MeV}$  we obtain  $L_i^* \sim 6.9$ . These ~~is are~~ very rough estimates  
360 estimations, but they ~~correspond to are in agreement with the~~ results presented in Figs. 3–6.



361 These estimates are based on the following assumption: during variations in solar activity, the rates  
362 of ion supply on  $L < L_i^*$  remain unchanged (or these changes are weaker than the effect of changes of  
363 the rate of ion losses). This assumption is real for protons with  $E > 10\text{--}20$  MeV at  $L < 2.2$ ; in fact,  
364 the fluxes of these protons forming mainly under the action of the CRAND mechanism. However, at  
365  $L > 2.2$  the stationary ion fluxes of the ERB forming mainly under the action of radial diffusion (see,  
366 e.g., Schulz and Lanzerotti, 1974; Kovtyukh, 2016b, 2018). Therefore, the solar-cyclic variations of  
367 ~~fluxes for ions with  $Z \geq 2$~~  ion fluxes ~~one~~ can be explain motivated only under the assumption that the  
368 effect ~~connected related~~ with an ~~increasing~~ increase in the ionization losses of such ions significantly  
369 exceeds the effect connected with the possible enhance of radial diffusion of ions on the ~~growth~~ rising  
370 phase of solar activity.

371 In the experimental results presented here for the ERB ions, the region of the power-law tail of  
372 the ion spectra is distinguished. For many experiments, especially for heavy ions, the values of the  
373 parameter of a power-law tail spectra are determined much more accurately by the dependences  
374  $J(L)$  of the ion fluxes (in ~~the~~ logarithmic scale) for different pairs of energy channels (see  
375 Kovtyukh, 2001). For example, the range of  $L$ , in which these dependences for two energy  
376 channels are parallel to each other is ~~corresponded~~ connected to the power-law tail of the spectra.  
377 ~~On~~ Instead, on smaller values of  $L$  these fluxes begin to converge and ~~the~~ radial dependences of ~~the~~  
378 ~~these~~ fluxes intersect with each other, which is ~~corresponded~~ related to the maximum in the  
379 spectra. ~~Consider here the physical mechanisms leading to the formation of power-law~~  
380 ~~distributions of ions of the ERB.~~

381 The main source of ions in the outer regions of the ERB is the solar wind, and ~~usually~~ the high-  
382 energy part of these spectra have an exponential shape ~~usually~~ (see, e.g., Ipavich et al., 1981a,  
383 1981b). Immediately before being captured into the magnetosphere, these ions pass through a  
384 highly turbulized regions, but the high-energy part of their spectra usually retains an exponential  
385 shape. Therefore, the question arises: what physical mechanism converts the form of ion spectra  
386 from exponential to power-law?

387 Evidently, the power-law tail of the ERB ions spectra must be generate-in the outer regions of  
388 the magnetosphere. The most likely region for this ~~to happen~~ is the plasma sheet (PS) of the  
389 magnetospheric tail, which is adjacent to the geomagnetic trap. High-energy part of the ion spectra  
390 in the PS, at  $R \sim 20\text{--}40 R_E$ , have power-law shape and the exponents of these spectra ~~is~~ are close to  
391 the corresponding parameters of the spectra of ions in the ERB. On the data of the satellites IMP-7  
392 and IMP-8: ~~Interplanetary Monitoring Platform 7 and 8~~ (Sarris et al., 1981; Lui et al., 1981) and  
393 also satellite ISEE-1 (Christon et al., 1991), the shape of the ion spectra of the PS usually do not  
394 ~~changed~~ during substorms; they produce only parallel shifts of the spectra along logarithmic axes  $E$   
395 and  $J$ . These results point out that the time scales of formation processes of these ion spectra in the  
396 PS ~~are far~~ exceeds the times of substorms.

397 Parameters of the power-law tail of the ion spectra of the outer belt ( $\gamma$  and  $\mu_b$ ) reflect,  
398 apparently, the most fundamental features of the mechanisms of acceleration of ions in the tail of  
399 the magnetosphere. One can try to connect the values of these parameters with the most general  
400 representations ~~about~~ of the mechanisms ~~and character~~ of ion acceleration in the PS of the  
401 magnetospheric tail.

402 Most likely, this part of the ion energy spectra ~~is~~ formed in the PS by stochastic mechanisms of  
403 ~~the~~ ion acceleration. ~~This~~; this hypothesis ~~is~~ supported by many experimental results. ~~Statistical~~  
404 ~~character~~ The statistical aspect of these mechanisms reveals itself, in particular, in the fact that the  
405 ratios of fluxes (and partial densities) of ions with different  $Z$  can ~~be~~ differ, ~~even~~ greatly, at low  
406 and high energies. During ~~their~~ wander in the phase space, ions gradually ~~forget~~ loose information  
407 ~~about~~ their origin and, therefore, the high-energy tails of ~~the ion~~ their spectra ~~do not~~ contain  
408 ~~unambiguous~~ information on the partial densities of different components of ions in the source  
409 (see, e.g., Kovtyukh, 2001).

410 The high-energy ~~part~~ portion of the ion spectra of the PS can be generated by the mechanisms  
411 of acceleration of particles on magnetic irregularities moving ~~relative with respect~~ to each other

412 (Fermi mechanism). The fractal structures of the PS are revealed itself on scales from  $\sim 0.4$  to  $\sim 8$   
413 thousands kilometers, for example, in the data of the satellite Geotail (Milovanov et al., 1996). If  
414 the mass of the ions are small compared to the masses of the magnetic irregularities in the PS, the  
415 average values of the index  $\gamma$  of the power-law tail of the spectra should not depend on mass and  
416 charge of these ions such nuclei.

417 Under equilibrium conditions, this parameter is determined by the average part of energetic ions  
418 in the total energy density of particles and magnetic irregularities ( $\bar{\beta}$ ). From the theory which was  
419 developed by Ginzburg and Syrovatskii (1964), it is follows:  $\gamma - 1 \approx (1 - \bar{\beta})^{-1}$ . With increasing  $\bar{\beta}$   
420 in the interval  $0 < \bar{\beta} < 1$ , the value  $\gamma$  is increases monotonically and  $\gamma \rightarrow \infty$  for  $\bar{\beta} \rightarrow 1$ . For real  
421 average values  $\bar{\beta}$  in the central PS, we get  $\gamma \sim 3.5-7.0$  ( $\gamma \sim 4.3$  at  $\bar{\beta} \sim 0.7$ ).

422 Spectra with power-law tail and quasi-exponential segment at lower energies can be generated  
423 when the value  $\Delta B/\bar{B}$  for magnetic irregularities is proportional to their size  $\delta r$  and the their  
424 spectral density of irregularities is decrease rapidly with increasing  $\delta r$  for  $\delta r < r_s$ , but for  $\delta r > r_s$  it  
425 remains almost unchanged. Apparently, the spectra of magnetic irregularities in PS with thickness  
426  $r_s$  have just such form. Then the lower boundary  $\mu_b$  of the power-law tail is corresponded  
427 corresponds to the condition  $r_s/\rho_i \sim 10$  ( $\rho_i$  is the gyroradius of ions), i.e.  $\mu_b \sim 0.02(Q_i^2/M_i)B_s r_s^2$  keV  
428  $\text{nT}^{-1}$ , where  $B_s$  is the average magnetic field induction in the PS (in nT) and  $r_s$  is normalized to the  
429 Earth's radius. Believing that  $B_s \sim 30$  nT and  $r_s \sim 1.3 R_E$  it can be obtained:  $\mu_b \sim 1.0(Q_i^2/M_i)$  keV  
430  $\text{nT}^{-1}$ .

431 The energy spectra of ions in the radiation belts of such planets as Jupiter and Saturn have the  
432 form analogous to the form that of ion spectra in the ERB (see, e.g., Krimigis et al., 1981; Cheng et  
433 al., 1985). As that in the ERB, these spectra have a long power-law tail, which is formed,  
434 apparently, by mechanisms of stochastic acceleration of ions as a result of interactions of these  
435 ions with the current layer of the magnetospheric tail.

## 436 5 Conclusions

437 There are analyzed In this work, the experimental results for the stationary fluxes of the main ion  
438 components of the ERB (protons, helium ions and ions of the CNO group) in the near equatorially  
439 plane, have been analyzed. It is found that in the outer belt these fluxes line up in the certain  
440 regular patterns in the space  $\{E, L\}$ . The degree of such similarity is increases with increasing  $E$   
441 and  $L$ . The similarity of the spatial-energy distributions for various ionic components of the ERB is  
442 based on and it is linked to the nature of the main sources and on the universality mechanisms of  
443 transfer, acceleration and losses of ERB ions in the outer belt (radial diffusion while conserving  $\mu$   
444 and  $K$  of ions, betatron acceleration and ionization losses).

445 Solar-cyclic Moreover, solar-cyclic (11-year) variations of the spatial-energy distributions of  
446 the ERB ion fluxes are have been investigated. It is find has been noted that the ERB ions fluxes  
447 are weaken weaker with increasing the solar activity and this effect increases with increasing an  
448 atomic number  $Z$  of the ions. Such a dependence of the amplitude of flux changes on  $Z$  is typical,  
449 also, for faster variations in the fluxes of the ERB ions, during geomagnetic storms and other  
450 disturbances of the Earth's magnetosphere, what is as has been underlined in the review Kovtyukh  
451 (2018).

452 The figures presented here make it possible to determine in which regions of the space  $\{E, L\}$   
453 near the equatorial plane the ionization losses of ions during their radial diffusion can be neglected  
454 and where this cannot. These results indicate also that with variations in the level of solar activity  
455 the coefficient  $D_{LL}$  of the radial diffusion of the ERB ions change much less than the ionization  
456 losses rates of ions with  $Z \geq 2$ .

457 In addition, the figures given here reveal the localization of "white spots", especially extensive for  
458 ions with  $Z \geq 2$  and  $E > 1$  MeV/n at  $L < 3$ . The larger As  $Z$  and energy of ions become larger and the

459 smaller  $L$  becomes smaller, the greater the uncertainty uncertainties in the values of the ERB fluxes  
460 become larger. These gaps must be filled by the results of the future experiments on the satellites-  
461 New ; for now, the extensive gaps in the experimental data for fluxes of ions with  $Z \geq 2$  do not allow  
462 to create the sufficiently complete and reliable empirical models of the ERB for these ions.

463

## 464 Acknowledgements.

465 **Financial support.** This work was supported by Russian Foundation for Basic Research RFFI  
466 grant No. 17-29-01022.

## 467 References

- 468 Alfvén, H., and Fälthammar, C.-G.: *Cosmical Electrodynamics, Fundamental Principles*,  
469 Clarendon Press, Oxford, 1963.
- 470 Albert, J. M., Ginet, G. P., and Gussenhoven, M. S.: CRRES observations of radiation belt protons,  
471 1, Data overview and steady state radial diffusion, *J. Geophys. Res.*, **103**(A5), 9261–9273.  
472 <https://doi.org/10.1029/97JA02869>, 1998.
- 473 Blake, J. B., and Fennell, J. F.: Heavy ion measurements in the synchronous altitude region, *Planet.*  
474 *Space Sci.*, **29**(11), 1205–1213, [https://doi.org/10.1016/0032.0633\(81\)90125-2](https://doi.org/10.1016/0032.0633(81)90125-2), 1981.
- 475 Blake, J. B., Fennell, J. F., Schulz, M., and Paulikas, G. A.: Geomagnetically trapped alpha  
476 particles, 2, The inner zone, *J. Geophys. Res.*, **78**(25), 5498–5506,  
477 <https://doi.org/10.1029/JA078i025p05498>, 1973.
- 478 Blanchard, R. C., and Hess, W. N.: Solar cycle changes in inner-zone protons, *J. Geophys. Res.*,  
479 **69**(19), 3927–3938, <https://doi.org/10.1029/JZ069i019p03927>, 1964.
- 480 Chenette, D. L., Blake, J. B., and Fennell, J. F.: The charge state composition of 0.4–MeV helium  
481 ions in the Earth’s outer radiation belts during quiet times, *J. Geophys. Res.*, **89**(A9), 7551–  
482 7555, <https://doi.org/10.1029/JA089iA09p07551>, 1984.
- 483 Cheng, A. F., Krimigis, S. M., and Armstrong, T. P.: Near equality of ion phase space densities at  
484 Earth, Jupiter, and Saturn, *J. Geophys. Res.*, **90**(A9), 526–530,  
485 <http://doi.org/10.1029/JA090iA01p00526>, 1985.
- 486 Christon, S. P., Williams, D. J., Mitchell, D. G., Huang, C. Y., and Frank, L. A.: Spectral  
487 characteristics of plasma sheet ion and electron populations during disturbed geomagnetic  
488 conditions, *J. Geophys. Res.*, **96**(A1), 1–22, <https://doi.org/10.1029/90JA01633>, 1991.
- 489 Croley, D. R., Jr., Schulz, M., and Blake, J. B.: Radial diffusion of inner-zone protons:  
490 Observations and variational analysis, *J. Geophys. Res.*, **81**(4), 585–594,  
491 <https://doi.org/10.1029/JA081i004p00585>, 1976.
- 492 Dragt, A. J.: Solar cycle modulation of the radiation belt proton flux, *J. Geophys. Res.*, **76**(10),  
493 2313–2344, <https://doi.org/10.1029/JA076i010p02313>, 1971.
- 494 Fennell, J. F., and Blake, J. B.: Geomagnetically trapped  $\alpha$ -particles, *Magnetospheric Particles and*  
495 *Fields*, edited by: McCormac, B. M., D. Reidel, Dordrecht, Holland, 149–156, 1976.
- 496 Filz, R. C.: Comparison of the low-altitude inner-zone 55–MeV trapped proton fluxes measured in  
497 1965 and 1961–1962, *J. Geophys. Res.*, **72**(3), 959–963,  
498 <https://doi.org/10.1029/JZ072i003p00959>, 1967.
- 499 Freden, S. C., Blake, J. B., and Paulikas, G. A.: Spatial variation of the inner zone trapped proton  
500 spectrum, *J. Geophys. Res.*, **70**(13), 3113–3116, <https://doi.org/10.1029/JZ070i013p03113>,  
501 1965.
- 502 Fritz, T. A., and Spjeldvik, W. N.: Observations of energetic radiation belt helium ions at the  
503 geomagnetic equator during quiet conditions, *J. Geophys. Res.*, **83**(A6), 2579–2583,  
504 <https://doi.org/10.1029/JA083iA06p02579>, 1978.

505 Fritz, T. A., and Spjeldvik, W. N.: Simultaneous quiet time observations of energetic radiation belt  
506 protons and helium ions: The equatorial  $\alpha/p$  ratio near 1 MeV, *J. Geophys. Res.*, **84**(A6),  
507 2608–2618, <https://doi.org/10.1029/JA084iA06p02608>, 1979.

508 Fritz, T. A., and Spjeldvik, W. N.: Steady-state observations of geomagnetically trapped energetic  
509 heavy ions and their implications for theory, *Planet. Space Sci.*, **29**(11), 1169–1193,  
510 [https://doi.org/10.1016/0032-0633\(81\)90123-9](https://doi.org/10.1016/0032-0633(81)90123-9), 1981.

511 Ginzburg, V. L., and Syrovatskii, S. I.: *The Origin of Cosmic Rays*, Pergamon Press, Oxford,  
512 1964.

513 Ginat, G. P., O'Brien, T. P., Huston, S. L., Johnston, W. R., Guild, T. B., Friedel, R., Lindstrom,  
514 C. D., Roth, C. J., Whelan, P., Quinn, R. A., Madden, D., Morley, S., and Su, Yi-J.: AE9, AP9  
515 and SPM: New models for specifying the trapped energetic particle and space plasma  
516 environment, *Space Sci. Rev.*, **179**(1–4), 579–615, <https://doi.org/10.1007/s11214-013-9964-y>,  
517 2013.

518 Goka, T., Matsumoto, H., and Takagi, S.: Empirical model based on the measurements of the  
519 Japanese spacecrafts, *Radiation Measurements*, **30**(5), 617–624, [https://doi.org/10.1016/S1350-4487\(99\)00237-1](https://doi.org/10.1016/S1350-4487(99)00237-1), 1999.

521 Hess, W. N.: Discussion of paper by Pizzella, McIlwain, and Van Allen, 'Time variations of  
522 intensity in the Earth's inner radiation zone, October 1959 through December 1960', *J.*  
523 *Geophys. Res.*, **67**(12), 4886–4887, <https://doi.org/10.1029/JZ0670i012p04886>, 1962.

524 Hovestadt, D., Häusler, B., and Scholer, M.: Observation of energetic particles at very low  
525 altitudes near the geomagnetic equator, *Phys. Rev. Lett.*, **28**(20), 1340–1343,  
526 <https://doi.org/10.1103/PhysRevLett.28.1340>, 1972.

527 Hovestadt, D., Gloeckler, G., Fan, C. Y., Fisk, L. A., Ipavich, F.M., Klecker, B., O'Gallagher, J. J.,  
528 and Scholer, M.: Evidence for solar wind origin of energetic heavy ions in the Earth's radiation  
529 belt, *Geophys. Res. Lett.*, **5**(12), 1055–1057, <https://doi.org/10.1029/GL005i012p01055>, 1978.

530 Hovestadt, D., Klecker, B., Mitchell, E., Fennell, J. F., Gloeckler, G., and Fan, C. Y.: Spatial  
531 distribution of  $Z \geq 2$  ions in the outer radiation belt during quiet conditions, *Adv. Space Res.*,  
532 **1**(1), 305–308, [https://doi.org/10.1016/0273-1177\(81\)90125-3](https://doi.org/10.1016/0273-1177(81)90125-3), 1981.

533 Huston, S., Kuck, G., and Pfitzer, K.: Low-altitude trapped radiation model using TIROS/NOAA  
534 data, *Radiation Belts: Models and Standards*, edited by: Lemaire, J. F., Heynderickx, D., and  
535 Baker, D. N., AGU, Washington, D. C., 119–122, <https://doi.org/10.1029/GM097/p0119>, 1996.

536 Ilyin, B. D., Kuznetsov, S. N., Panasyuk, M. I., and Sosnovets, E.N.: Non-adiabatic effects and  
537 boundary of the trapped protons in the Earth's radiation belts, *Bulletin of the Russian Academy*  
538 *of Sciences: Physics*, **48**(11), 2200–2203, 1984.

539 Ipavich, F. M., Galvin, A. B., Gloeckler, G., Scholer, M., and Hovestadt D.: A statistical survey of  
540 ions observed upstream of the Earth's bow shock: Energy spectra, composition, and spatial  
541 variation, *J. Geophys. Res.*, **86**(A6), 4337–4342, <https://doi.org/10.1029/JA086iA06p4337>,  
542 1981a.

543 Ipavich, F. M., Scholer, M., and Gloeckler, G.: Temporal development of composition, spectra,  
544 and anisotropies during upstream particle events, *J. Geophys. Res.*, **86**(A13), 11153–11160,  
545 <https://doi.org/10.1029/JA086iA13p11153>, 1981b.

546 Kovtyukh, A. S.: Geocorona of hot plasma, *Cosmic Res.*, **39**(6), 527–558,  
547 <https://doi.org/10.1023/A:1013074126604>, 2001.

548 Kovtyukh, A. S.: Radial dependence of ionization losses of protons of the Earth's radiation belts,  
549 *Ann. Geophys.*, **34**(1), 17–28, <https://doi.org/10.5194/angeo-34-17-2016>, 2016a.

550 Kovtyukh, A. S.: Deduction of the rates of radial diffusion of protons from the structure of the  
551 Earth's radiation belts, *Ann. Geophys.*, **34**(11), 1085–1098. [https://doi.org/10.5194/angeo-34-1085-](https://doi.org/10.5194/angeo-34-1085-2016)  
552 2016, 2016b.

553 Kovtyukh, A. S.: Ion Composition of the Earth's Radiation Belts in the Range from 100 keV to  
554 100 MeV/nucleon: Fifty Years of Research, *Space Sci. Rev.*, **214**(8), 124:1–124:30,  
555 <https://doi.org/10.1007/s11214-018-0560-z>, 2018.



556 Krimigis, S. M.: Alpha particles trapped in the Earth's magnetic field, *Particles and Fields in the*  
557 *Magnetosphere*, edited by: McCormac, B. M., D. Reidel, Dordrecht, Holland, 364–379, 1970.

558 Krimigis, S. M., Carbary, J. F., Keath, E. P., Bostrom, C. O., Axford, W. I., Gloeckler, G.,  
559 Lanzerotti, L. J., and Armstrong, T. P.: Characteristics of hot plasma in the Jovian  
560 magnetosphere: Results from the Voyager spacecraft, *J. Geophys. Res.*, **86**(A10), 8227–8257.  
561 <http://doi.org/10.1029/JA086iA10p08227>, 1981.

562 Kuznetsov, N. V., Nikolaeva, N. I., and Panasyuk, M. I.: Variation of the trapped proton flux in the  
563 inner radiation belt of the Earth as a function of solar activity, *Cosmic Res.*, **48**(1), 80–85,  
564 <https://doi.org/10.1134/S0010952510010065>, 2010.

565 Lui, A. T. Y., and Krimigis, S. M.: Several features of the earthward and tailward streaming of  
566 energetic protons (0.29–0.5 MeV) in the Earth's plasma sheet, *J. Geophys. Res.*, **86**(A13),  
567 11173–11188, <https://doi.org/10.1029/JA086iA13p11173>, 1981.

568 Lutsenko, V. N., and Nikolaeva, N. S.: Relative content and the range of alpha particles in the  
569 inner radiation belt of the Earth by measurements on satellite Prognoz-5, *Cosmic Res.*, **16**(3),  
570 459–462, 1978.

571 McIlwain, C. E.: Coordinate for mapping the distribution of magnetically trapped particles, *J.*  
572 *Geophys. Res.*, **66**(11), 3681–3691, <https://doi.org/10.1029/JZ066i011p03681>, 1961.

573 Milovanov, A. V., Zelenyi, L. M., and Zimbardo, G.: Fractal structures and power low spectra in  
574 the distant Earth's magnetotail, *J. Geophys. Res. Space Phys.*, **101**(A9), 19903–19910,  
575 <https://doi.org/10.1029/96JA01562>, 1996.

576 Nakano, G., and Heckman, H.: Evidence for solar-cycle changes in the inner-belt protons, *Phys.*  
577 *Rev. Lett.*, **20**(15), 806–809, <https://doi.org/10.1103/PhysRevLett.20.806>, 1968.

578 Northrop, T. G.: *The Adiabatic Motion of Charged Particles*, Wiley-Interscience, NY, USA, 1963.

579 Panasyuk, M. I., and Sosnovets, E. N.: Differential energy spectrum of low-energy protons in the  
580 inner region of the radiation belt, *Cosmic Res.*, **11**(3), 436–440, 1973.

581 Panasyuk, M. I., Reizman, S. Ya., Sosnovets, E. N., and Filatov, V. N.: Experimental results of  
582 protons and  $\alpha$ -particles measurements with energy more 1 MeV/nucleon in the radiation belts,  
583 *Cosmic Res.*, **15**(6), 887–894, 1977.

584 Pizzella, G., McIlwain, C. E., and Van Allen, J. A.: Time variations of intensity in the Earth's  
585 inner radiation zone, October 1959 through December 1960, *J. Geophys. Res.*, **67**(4), 1235–  
586 1253, <https://doi.org/10.1029/JZ067i004p01235>, 1962.

587 Pizzella, G., and Randall, B. A.: Differential energy spectrum of geomagnetically trapped protons  
588 with the Injun 5 satellite, *J. Geophys. Res.*, **76**(10), 2306–2312,  
589 <https://doi.org/10.1029/JA076i010p02306>, 1971.

590 Qin, M., Zhang, X., Ni, B., Song, H., Zou, H., and Sun, Y.: Solar cycle variations of trapped  
591 proton flux in the inner radiation belt, *J. Geophys. Res. Space Phys.*, **119**(12), 9658–9669,  
592 <https://doi.org/10.1002/2014JA020300>, 2014.

593 Sarris, E. T., Krimigis, S. M., Lui, A. T. Y., Ackerson, K. L., Frank, L. A., and Williams, D. J.:  
594 Relationship between energetic particles and plasmas in the distant plasma sheet, *Geophys. Res.*  
595 *Lett.*, **8**(4), 349–352, <https://doi.org/10.1029/GL008i004p0349>, 1981.

596 Schulz, M., and Lanzerotti, L. J.: *Particle Diffusion in the Radiation Belts*, Springer, NY, USA,  
597 1974.

598 Selesnick, R. S., Hudson, M. K., and Kress, B. T.: Injection and loss of inner radiation belt protons  
599 during solar proton events and magnetic storms, *J. Geophys. Res. Space Phys.*, **115**(A8),  
600 A08211, <https://doi.org/10.1029/2010JA015247>, 2010.

601 Selesnick, R. S., Baker, D. N., Jaynes, A. N., Li, X., Kanekal, S. G., Hudson, M. K., and Kress, B.  
602 T.: Observations of the inner radiation belt: CRAND and trapped solar protons, *J. Geophys.*  
603 *Res. Space Phys.*, **119**(8), 6541–6552, <https://doi.org/10.1002/2014JA020188>, 2014.

604 Selesnick, R. S., Baker, D. N., Kanekal, S. G., Hoxie, V. C., and Li, X.: Modeling the proton  
605 radiation belt with Van Allen Probes Relativistic Electron-Proton Telescope data, *J. Geophys.*  
606 *Res. Space Phys.*, **123**(1), 685–697, <https://doi.org/10.1002/2017JA024661>, 2018.

607 Spjeldvik, W. N.: Expected charge states of energetic ions in the magnetosphere, *Space Sci. Rev.*,  
608 **23**(3), 499–538, <https://doi.org/10.1007/BF00172252>, 1979.

609 Spjeldvik, W. N., and Fritz, T. A.: Quiet time observations of equatorially trapped  
610 megaelectronvolt radiation belt ions with nuclear charge  $Z \geq 4$ , *J. Geophys. Res.*, **83**(A9), 4401–  
611 4405, <https://doi.org/10.1029/JA083iA09p04401>, 1978.

612 Spjeldvik, W. N., and Fritz, T. A.: Observations of energetic helium ions in the Earth's radiation  
613 belts during a sequence of geomagnetic storms, *J. Geophys. Res.*, **86**(A4), 2317–2328,  
614 <https://doi.org/10.1029/JA086iA04p02317>, 1981.

615 Stevens, J. R., Martina, E. F., and White, R. S.: Proton energy distributions from 0.060 to 3.3 MeV  
616 at 6.6 Earth radii, *J. Geophys. Res.*, **75**(28), 5373–5385,  
617 <https://doi.org/10.1029/JA075i028p05373>, 1970.

618 Vacaresse, A., Boscher, D., Bourdarie, S., Blanc, M., and Sauvaud, J. A.: Modeling the high-  
619 energy proton belt, *J. Geophys. Res. Space Phys.*, **104**(A12), 28601–28613,  
620 <https://doi.org/10.1029/1999JA900411>, 1999.

621 Venkatesan, D., and Krimigis, S. M.: Observations of low-energy (0.3– to 1.8-MeV) differential  
622 spectrums of trapped protons, *J. Geophys. Res.*, **76**(31), 7618–7631,  
623 <https://doi.org/10.1029/JA076i031p07618>, 1971.

624 Vernov, S. N.: The Earth's radiation belts. In G. Bozóki, E. Gombosi, A. Sebastyén, A. Somogyi  
625 (Eds.), *Proc. 11<sup>th</sup> ICRC, Budapest*, 85–162, 1969.

626 Westphalen, H., and Spjeldvik, W.N.: On the energy dependence of the radial diffusion coefficient  
627 and spectra of inner radiation belt particles: Analytic solution and comparison with numerical  
628 results, *J. Geophys. Res.*, **87**(A10), 8321–8326, <https://doi.org/10.1029/2000JA087iA10p08321>,  
629 1982.

630 Wilken, B., Baker, D. N., Highbie, P. R., Fritz, T. A., Olson, W. P., and Pfitzer, K. A.:  
631 Magnetospheric configuration and energetic particle effects associated with a SSC: A case study  
632 of the CDAW 6 event on March 22, 1979, *J. Geophys. Res.*, **91**(A2), 1459–1473,  
633 <https://doi.org/10.1029/JA091iA02p01459>, 1986.

634 Williams, D. J.: Phase space variations of near equatorially mirroring ring current ions, *J. Geophys.*  
635 *Res.*, **86**(A1), 189–194, <https://doi.org/10.1029/JA086iA01p00189>, 1981.

636 Williams, D. J., and Frank, L. A.: Intense low-energy ion populations at low equatorial altitude, *J.*  
637 *Geophys. Res.*, **89**(A6), 3903–3911, <https://doi.org/10.1029/JA089iA06p03903>, 1984.

638

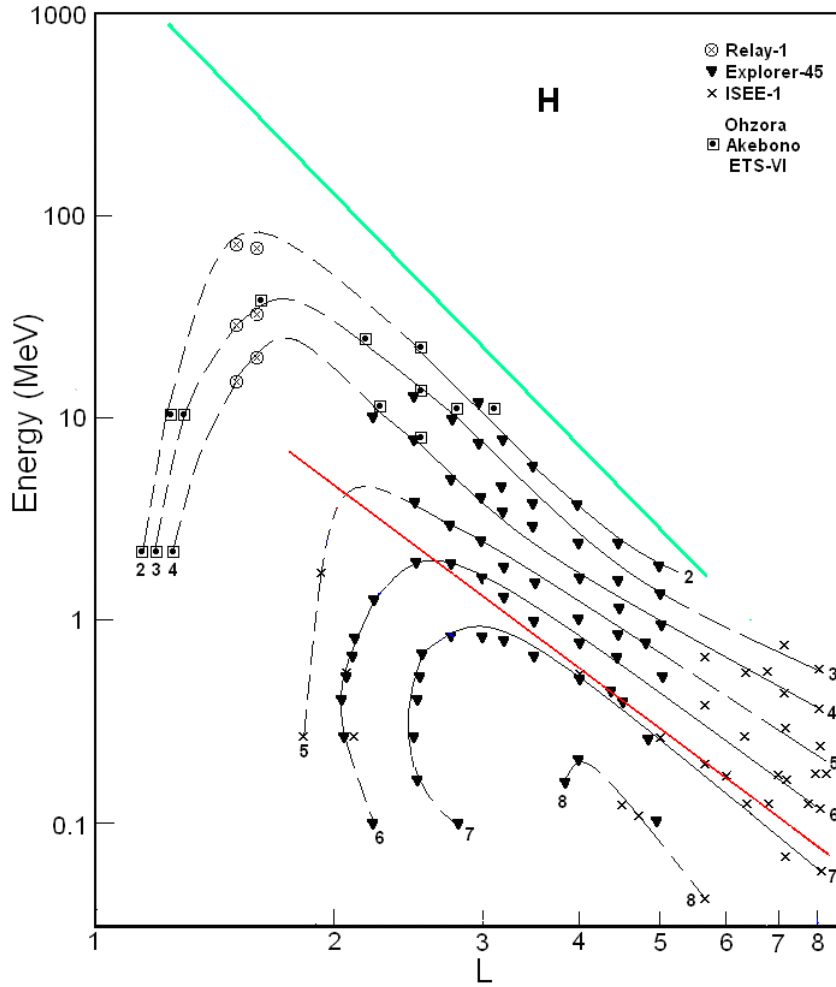

639

640

641

642

643

644

**Figure 1.** Proton fluxes in the ERB near minima of the solar activity. **A** The numbers on the curves are equal refer to the values of the decimal logarithms of  $J$  where  $J$  is given in  $(\text{cm}^2 \text{ s ster MeV})^{-1}$ ; it is the differential fluxes of protons with  $\alpha_0 \approx 90^\circ$  (near the plane of the geomagnetic equator). Data of satellites are presented associated by different symbols. The red line corresponded corresponds to the lower boundary of the power-law tail of the proton spectra; while green line corresponded corresponds to the maximum energy of protons trapped in the ERB (Ilyin et al., 1984).

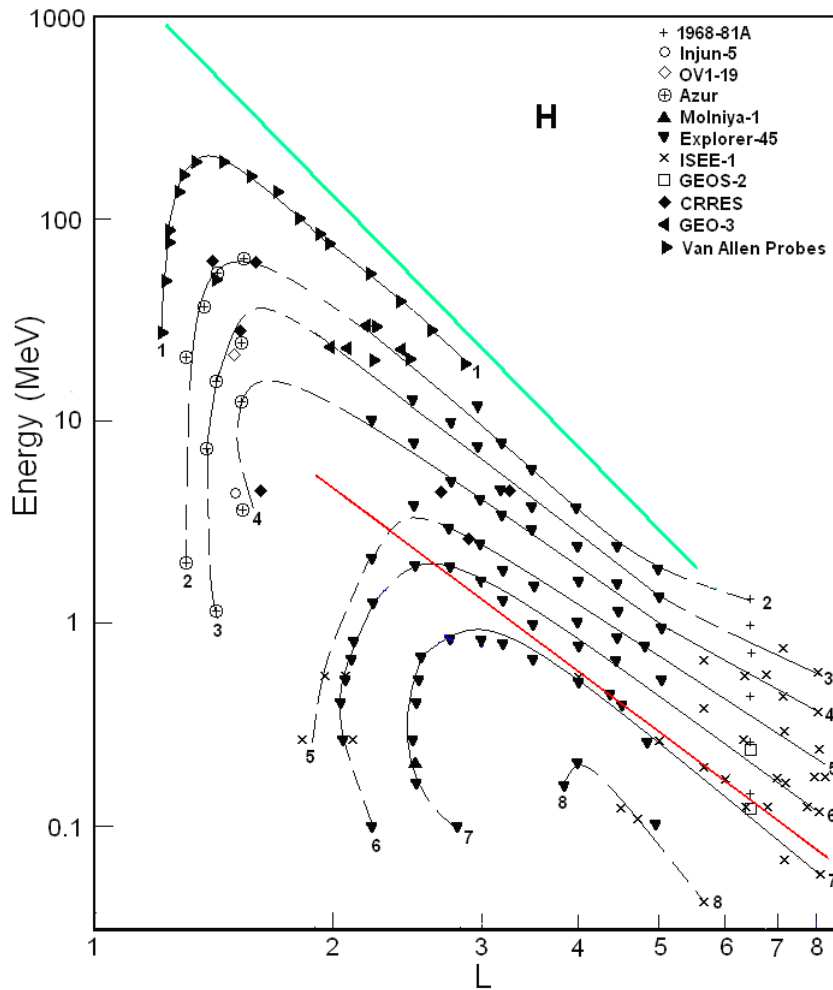

645  
 646  
 647  
 648  
 649  
 650

**Figure 2.** Proton fluxes in the ERB near maxima of the solar activity. The numbers on the curves refer to the values of the decimal logarithms of  $J$  where  $J$  is given in  $(\text{cm}^2 \text{ s ster MeV})^{-1}$  is the differential fluxes of protons with  $\alpha_0 \approx 90^\circ$  (near the plane of the geomagnetic equator). Data of satellites are associated by different symbols. The red line corresponds to the lower boundary of the power-law tail of the proton spectra; while green line corresponds to the maximum energy of protons trapped in the ERB (Ilyin et al., 1984).



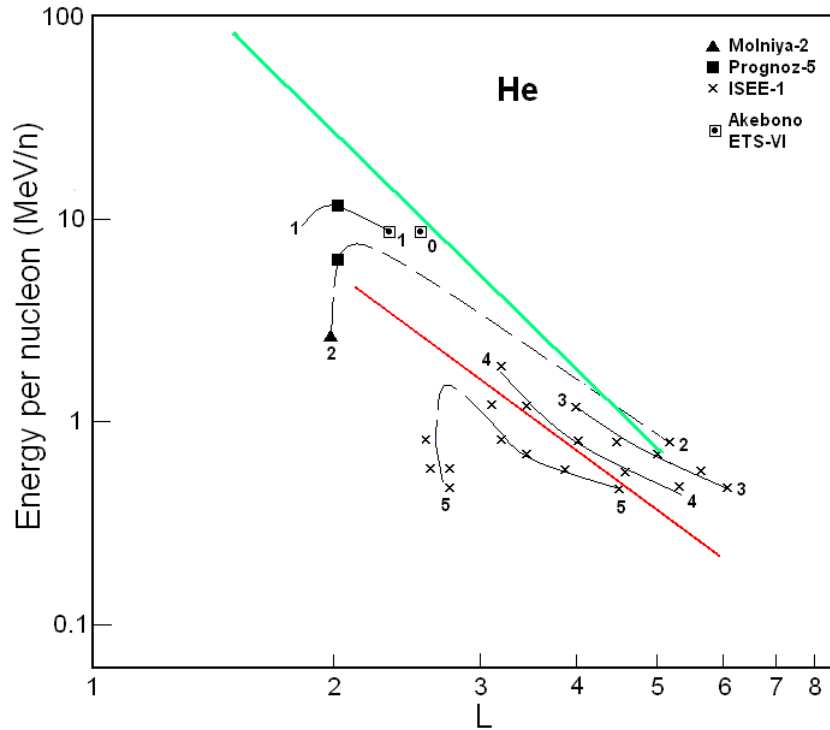

651  
 652 **Figure 3.** Helium ion fluxes in the ERB near minima of the solar activity. The numbers on the curves refer to the  
 653 values of the decimal logarithms of  $J$  where  $J$  is given in  $(\text{cm}^2 \text{ s ster MeV/n})^{-1}$  is the differential fluxes of helium ions  
 654 with  $\alpha_0 \approx 90^\circ$  (near the plane of the geomagnetic equator). Data of satellites are associated by different symbols. The  
 655 red line corresponds to the lower boundary of the power-law tail of the helium spectra; while green line corresponds to  
 656 the maximum energy of these ions trapped in the ERB (Ilyin et al., 1984).

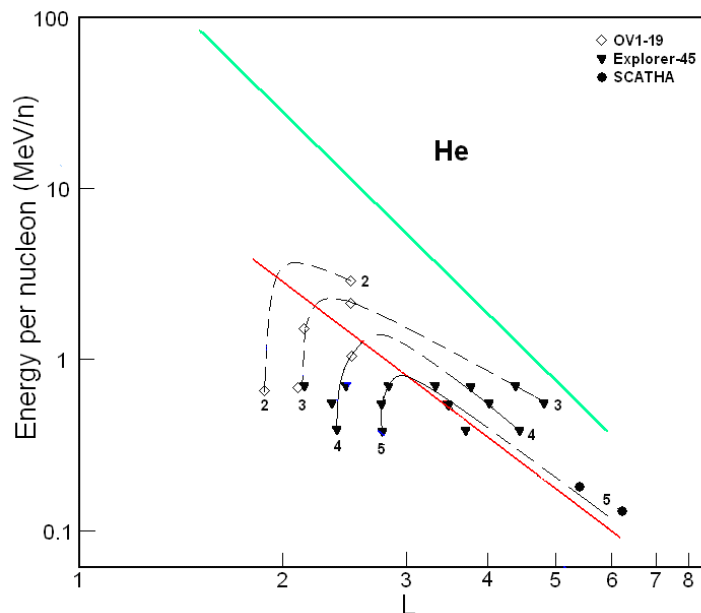

657  
 658 **Figure 4.** Helium ion fluxes in the ERB near maxima of the solar activity. The numbers on the curves refer to the  
 659 value of the decimal logarithms of  $J$  where  $J$  is given in  $(\text{cm}^2 \text{ s ster MeV/n})^{-1}$  is the differential fluxes of ions with  $\alpha_0 \approx$   
 660  $90^\circ$  (near the plane of the geomagnetic equator). Data of satellites are associated by different symbols. The red line  
 661 corresponds to the lower boundary of the power-law tail of the helium spectra; while green line corresponds to the  
 662 maximum energy of these ions trapped in the ERB (Ilyin et al., 1984).

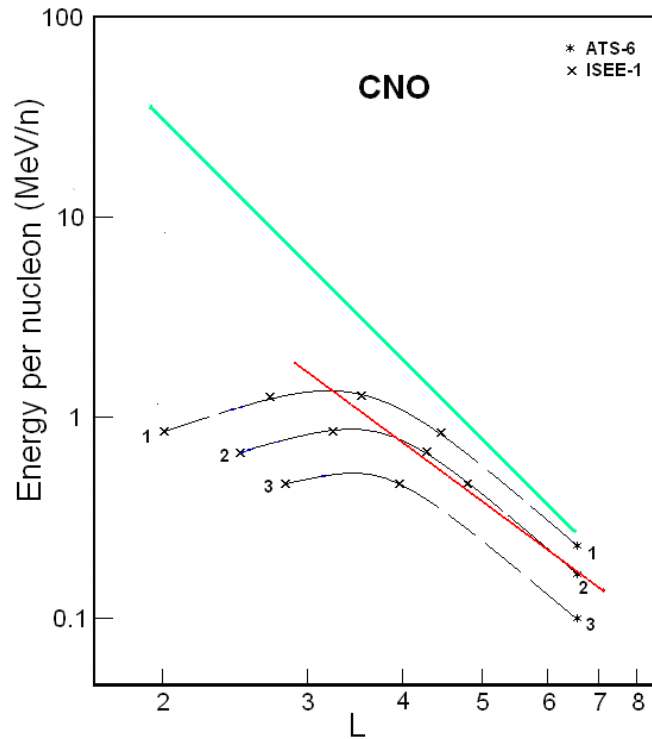

663  
664  
665  
666  
667  
668

**Figure 5.** CNO ion fluxes in the ERB near minima of the solar activity. The numbers on the curves refer to the values of the decimal logarithms of  $J$  where  $J$  is given in  $(\text{cm}^2 \text{ s ster MeV/n})^{-1}$  is the differential fluxes of ions with  $\alpha_0 \approx 90^\circ$  (near the plane of the geomagnetic equator). Data of satellites are associated by different symbols. The red line corresponds to the lower boundary of the power-law tail of the CNO ion spectra; while green line corresponds to the maximum energy of these ions trapped in the ERB (Ilyin et al., 1984).

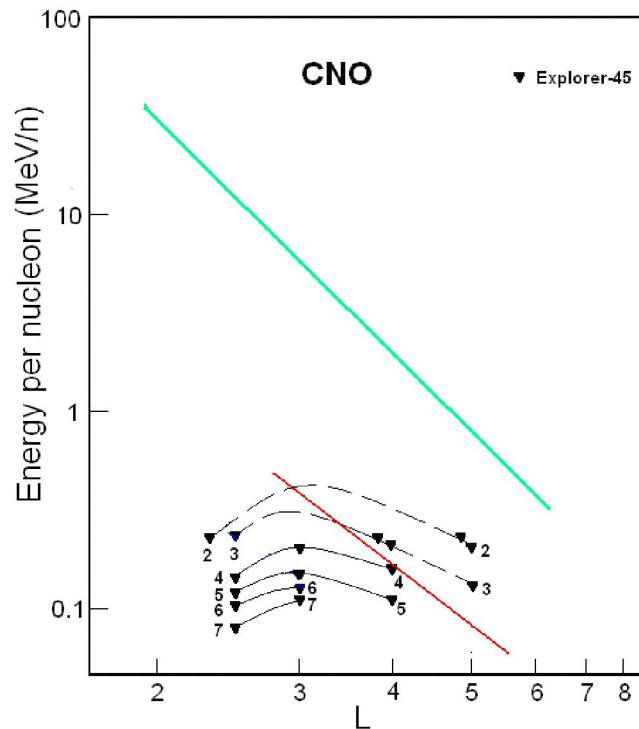

669  
670  
671  
672  
673  
674

**Figure 6.** CNO ion fluxes in the ERB near the maximum of the solar activity. The numbers on the curves refer to the values of the decimal logarithms of  $J$  where  $J$  is given in  $(\text{cm}^2 \text{ s ster MeV/n})^{-1}$  is the differential fluxes of ions with  $\alpha_0 \approx 90^\circ$  (near the plane of the geomagnetic equator). Data of satellites are associated by different symbols. The red line corresponds to the lower boundary of the power-law tail of the CNO ion spectra; while green line corresponds to the maximum energy of these ions trapped in the ERB (Ilyin et al., 1984).
