# Supplementary material for: Earth's radiation belts ions: Patterns of the spatial-energy structure and its solar-cyclic variations
Source: Copernicus journal article supplement (doi:10.5194/angeo-2019-152), 2019-11-07
Supplement: Supplementary file [file angeo-2019-152-AC2-supplement.pdf]

1 **Earth's radiation belts ions: patterns of the spatial-energy structure**  
2 **and its solar-cyclic variations**

3 **Alexander S. Kovtyukh**

4 Skobeltsyn Institute of Nuclear Physics, Moscow State University, Moscow, 119234, Russia;  
5 kovtyukhas@mail.ru

6 **Abstract** Spatial-energy distributions of the stationary fluxes of protons, helium and ions of  
7 carbon-nitrogen-oxygen (CNO) group, with energy from  $E \sim 100$  keV to 200 MeV, in the  
8 Earth's radiation belts (ERB), at  $L \sim 1-8$ , are considered here using data from satellites in the  
9 period 1961–2017. It has been found that the results of these measurements line up in the space  
10  $\{E, L\}$  following some regular patterns. Solar-cyclic (11-year) variations in the distributions of  
11 protons, helium and CNO group ions fluxes in the ERB are studied. It has been observed that in  
12 the inner regions of the ERB, ~~ion~~ fluxes decrease with increasing solar activity and that the  
13 solar-cyclic variations of fluxes of  $Z \geq 2$  ions are much greater than for protons; moreover, it  
14 seems that they increase with increasing atomic number  $Z$ . Finally, the possible physical  
15 mechanisms leading to formation of this spatial-energy structure and to the solar-cyclic  
16 variations of the ERB ion fluxes are discussed.

17  
18 **Keywords.** Magnetospheric physics (energetic particles, trapped). Radiation belts.  
19

## 20 1 Introduction

21 The ERB consist mainly of charged particles with energy from  $E \sim 100$  keV to several hundreds of  
22 megaelectronvolt (MeV). These particles are trapped by the geomagnetic field at altitudes from  $\sim$   
23 200 kilometers to  $\sim 50\text{--}70$  thousands kilometers. The ERB ~~is consisted~~ mainly ~~from~~ of electrons  
24 and protons. ~~In ERB~~, but there are also helium nuclei and other  $Z > 2$  ions (like oxygen etc),  
25 where  $Z$  is the charge of the atomic nucleus with respect to the charge of the proton. During  
26 geomagnetic disturbances, ion fluxes, and their distributions are changed. These fluxes depend  
27 also on the phase of the solar cycle, conditions in the interplanetary space, and other factors.

28 Particles with different energy  $E$  and pitch angles  $\alpha$  ( $\alpha$  is the angle between a the local vector of  
29 the magnetic field and the vector of a particle velocity), which are injected into some point of the  
30 geomagnetic trap, drifted conserving the adiabatic invariants ( $\mu$ ,  $K$ ,  $\Phi$ ) and populate a narrow layer  
31 surrounding the Earth (Alfvén and Fälthammar, 1963; Northrop, 1963). This layer is called the  
32 drift shell. Therefore, experimental data on the ERB are often represented in coordinates  $\{L, B\}$ ,  
33 where  $L$  is the drift shell parameter and  $B$  is the local induction of the magnetic field (McIlwain,  
34 1961). For the dipole magnetic field,  $L$  is a distance, in the equatorial plane, from the given  
35 magnetic field line to the center of the dipole itself (in Earth's radii  $R_E$ ).

36 The stationary fluxes  $J$  of the ERB particles with given energy and pitch angle  $\alpha$  decrease  
37 usually when the point of observation is shifted from the equatorial plane to higher latitudes along  
38 a certain magnetic field line (if we exclude the peripheral regions of the geomagnetic trap, where  
39 the drift shells of the captured particles are split and branched). This dependence ~~of the particle~~  
40 ~~fluxes~~ is described by the functions  $J(B/B_0)$ , where  $B$  and  $B_0$  are values of the magnetic field at the  
41 point of observation and in the equatorial plane on the same magnetic field line, respectively.

42 Outer and inner regions of the ERB are maintained in dynamic equilibrium with the  
43 environment by different mechanisms (see review Kovtyukh, 2018).

44 The outer belt ( $L > 3.5$ ) is formed mainly by the mechanisms of radial diffusion of ~~such~~ ions  
45 towards the Earth under the action of fluctuations of both electric and magnetic fields resonating  
46 with their drift periods. This transport is accompanied by the betatron acceleration and by the  
47 ionization losses of the ions as a result of their interactions with the plasmasphere and with  
48 residual atmosphere.

49 The inner belt ( $L < 2.5$ ) of protons with  $E > 10$  MeV ~~was is~~ formed ~~by~~ mainly as a result of  
50 decay of neutrons knocked from the nuclei of the atmospheric atoms by the Galactic Cosmic Rays.  
51 For protons with  $E < 10$  MeV this, mechanism (CRAND) is supplemented by the radial diffusion  
52 of particles from the outer to the inner belt. The inner belt of ions with  $Z > 4$  ~~was is~~ formed mainly  
53 from the ions of the Anomalous component of Cosmic Rays.

54 In the intermediate region ( $2.5 < L < 3.5$ ) is operated also the mechanism of ion capture from  
55 Solar Cosmic Rays takes place during strong magnetic storms (see, e.g., Selesnick et al., 2014).

56 Thus, the main mechanisms of formation of the ERB, together with the sources of injection and  
57 losses of ions, are known. However, for a comprehensive verification of the physical models and  
58 to identify the mathematical models and their parameters, the formulation of complete and reliable  
59 empirical models of the ERB for each of the ion components, is necessary; it is also necessary for  
60 ensuring the safety of space flights.

61 These models can be created only using experimental data, obtained over many years and  
62 decades; such models (see, e.g., Ginet et al., 2013) were already created for protons (AP8/AP9)  
63 and they are widely used in space research. On the contrary, measurements of  $Z \geq 2$  ion fluxes  
64 suffer from technical problems due to small statistics and high background of protons and  
65 electrons. For this reasons, empirical and semi-empirical models for  $Z \geq 2$  ions, are applicable  
66 only to very limited regions of the space  $\{E, L\}$ .

67 One of the main problems of this work is to consider the possibility to create a sufficiently  
68 complete and reliable empirical models of the ERB for these ions based on currently available  
69 experimental data.

70 In the following sections, the spatial-energy structure of the ERB in the spaces  $\{E, L\}$  space for  
71 protons, helium and CNO group ions ~~on the experimental data are considered~~ (Sect. 2) together  
72 with the possible physical mechanisms of formation of these structures and ~~its~~ **their** solar-cyclic  
73 variations (Sect. 3). ~~Finally, are considered, and~~ the main conclusions of this work are given (Sect.  
74 4).

## 75 2 Spatial-energy distributions of the ion fluxes near the equatorial plane

76 There can be ions trapped in drift shells only with energies less than some maximum values,  
77 determined by the Alfvén's criterion:  $\rho_i(L, E, M_i, Q_i) \ll R_c(L)$ , where  $\rho_i$  is the gyroradius of ions,  
78 and  $R_c$  is the radius of curvature of the magnetic field near the equatorial plane ( $M_i$  and  $Q_i$  are mass  
79 and charge of ions with respect to the corresponding values for protons). According to this  
80 criterion and **to** the theory of stochastic motion of particles, the geomagnetic trap can capture and  
81 durably hold only ions with  $E$  (MeV)  $< 2000 \times (Q_i^2/M_i) L^{-4}$  (Ilyin et al., 1984). The green line in  
82 Figs 1-6 represents this **very** boundary.

83 When comparing the data of various experiments in the ERB, the question arises about the  
84 compatibility of these results with each other and the reasons for their discrepancies. ~~More or less~~  
85 **A significant number of these** discrepancies ~~in the results of the satellites~~ can be connected ~~with~~  
86 **to** the differences in their trajectories; in the construction of the instruments and their angular  
87 characteristics; in the energy ranges and sets of energy channels. For the stationary ERB, these  
88 discrepancies can also be associated with differences in the general state of the Sun, heliosphere  
89 and magnetosphere of the Earth during various periods of data-taking. These factors influence the  
90 fluxes of ions with  $Z \geq 2$  in the ERB more significantly with respect to proton fluxes (see, e.g.,  
91 Kovtyukh, 2018).

92 In this section, experimental data of various satellites, which were obtained for quiet periods  
93 ( $K_p < 2$ ) and near the equatorial plane of the ERB for ions with equatorial pitch angles  $\alpha_0 \approx 90^\circ$   
94 have been used. In the regions of  $E$  and  $L$  shells, where these data were obtained, the ion fluxes are  
95 not distorted by the background of other particles.

96 In many important experiments, the instruments were not able to separate fluxes of ions by their  
97 charge ~~of ions~~. Moreover, for the ions of the CNO group, the separation by mass are not usually  
98 performed. For heavier species, for example for Fe ions, we have very small data-sets. Therefore,  
99 this work presents data on helium ions (without any charge separating) and CNO ions (without any  
100 mass or charge separation).

101 To solve the aforementioned problems, it is important to choose the form of representation  
102 (space of variables), in which the results of ~~the single every~~ experiments can **be** compared to ~~each~~  
103 ~~other the others~~. In our case, the space  $\{E, L\}$  has been used; this choice is very efficient to better  
104 organize fragmentary experimental data obtained in different ranges of  $E$  and  $L$ .

105 Figures 1–6 ~~presented here show~~ the spatial-energy distributions of the fluxes of protons,  
106 helium ions, and ions of the CNO group near the equatorial plane. ~~These figures united in pairs:~~  
107 ~~odd~~ **Odd** figures refer to periods near the minima, and even figures refer to periods near the solar  
108 activity maxima. The values  $E$  and  $L$  in these figures are presented in logarithmic scales. Statistical  
109 and methodical errors of the experimental points on these figures do not exceed of the size of  
110 these points. ~~These points~~ **The markers** are connected by lines of ~~the~~ equal intensity of ion fluxes  
111 (iso-lines); the decimal logarithms of the fluxes  $J$ , in unit of  $(\text{cm}^2 \text{ s ster MeV/n})^{-1}$ , are shown near  
112 each iso-lines.

113 Such representations of the experimental data are not only visual, but also very convenient and  
114 rather universal. Obviously, Figs. 1–6 actually show both radial profiles of the fluxes of ions for a  
115 given energy and ion energy spectra for a given  $L$  shell.

116 ~~In this place, it is need to say a few words about the method of constructing these figures.~~ The  
117 points in Figs. 1–6 have been obtained from the radial profiles of fluxes  $J(L)$  for the average  
118 energies of the ions in the channels of the instruments. Unlike electron fluxes or ion fluxes  
119 measured during geo-active conditions, the ion fluxes considered here (i.e. during quiet periods),  
120 for ions usually have only one maximum in the functions  $J(L)$ . As a result, for each experiment, 1  
121 or 2 points were obtained (on the outer and inner edges of these profiles) with certain values of  $E$   
122 and  $L$  for a given level of ion fluxes. Sometimes, especially for fluxes, only one point was  
123 obtained: in these cases, the radial profile of the ion fluxes was cutoff at small values of  $L$  due to a  
124 significant background of contaminating particles and no interpolation/extrapolation has been  
125 performed whatsoever.

126 Each iso-line, shown in these figures, has been evaluated separately from the corresponding set  
127 of experimental points (icons); ~~after that this iso-line~~ **then it** was transferred (along with the icons)  
128 to the corresponding figure; thus, in more abundantly populated sectors of the plots (i.e. for protons  
129 with  $E > 1$  MeV at  $L > 2$ ) such iso-lines are mixing in Figs. 1–2. In case of a large distance  
130 between neighboring points, the corresponding segments of the iso-lines are shown as dashed arcs.

131 The radial profiles of the differential fluxes  $J(L)$  of particles with different energy tend to  
132 intersect with each other in those regions where the energy spectra present some local maximum or  
133 minimum. On the contrary, the iso-lines cannot intersect with each other: because this would mean  
134 that, at the same point in the space  $\{E, L\}$ , the ion fluxes differ very significantly (by an order of  
135 magnitude). Such uncertainty does not have a physical sense and a special analysis is needed to  
136 identify other possible sources of errors.

137 Representing plots in a different space of variables would lead only to more significant  
138 methodological errors and uncertainties, because of the natural differences in the instrumentation  
139 of the experiments taken into account; thus, a series of approximations or  
140 interpolation/extrapolation techniques would become inevitable.

## 141 2.1 Spatial-energy structure of the proton fluxes

142 There is a large number of experimental data concerning ERB protons; the most important of them  
143 are presented in Figs. 1 and 2. These figures serve as a comparison with similar distributions of  $Z \geq$   
144 2 ions (Figs. 3–6).

145 Figure 1 **represents sums up** results from the satellites Relay-1 (Freden et al., 1965); Ohzora or  
146 EXIS C: Exospheric Satellite C, Akebono or EXOS-D: Exospheric Satellite D and ETS-VI:  
147 Engineering Test Satellite (Goka et al., 1999). These results have been collected during minimum  
148 periods of various solar cycles, i.e. between 19<sup>th</sup> ~~and~~ / 20<sup>th</sup> (1963), 21<sup>th</sup> ~~and~~ / 22<sup>th</sup> (1984–1985), and  
149 22<sup>th</sup> ~~and~~ / 23<sup>th</sup> (1994–1996) of the solar activity cycles.

150 Figure 2 **represents sums up** results from the satellites 1968-81A (Stevens et al., 1970), Injun-5  
151 or Explorer-40 (Krimigis, 1970; Venkatesan and Krimigis, 1971; Pizzella and Randall, 1971),  
152 1969-025C or OV1-19: Orbiting Vehicle 1-19 (Croley et al., 1976), Azur or GRS A: German  
153 Research Satellite A (Hovestadt et al., 1972; Westphalen and Spjeldvik, 1982), Molniya-1  
154 (Panasyuk and Sosnovets, 1973), GEOS-2: Geodetic Earth Orbiting Satellite 2 (Wilken et al.,  
155 1986), CRRES: The Combined Release and Radiation Effects Satellite (Albert et al., 1998; Vacaresse  
156 et al., 1999), GEO-3: Geostationary Orbit 3 (Selesnick et al., 2010) and Van Allen Probes  
157 (Selesnick et al., 2014, 2018). These results were obtained during maximum periods of ~~solar~~  
158 ~~eyes:~~ 20<sup>th</sup> (1968–1971), 22<sup>th</sup> (1990–1991), 23<sup>th</sup> (2000), and 24<sup>th</sup> (2012–2017) **solar cycles**.

159 The data of the satellites Explorer-45 (Fritz and Spjeldvik, 1979, 1981) and ISEE-1:  
160 International Sun-Earth Explorer 1 or Explorer-56 (Williams, 1981; Williams and Frank, 1984) are  
161 given in both Figs. 1 and 2 because solar-cyclic variations of the ERB proton fluxes are negligible  
162 at  $L > 2.5$  (see, e.g., Vacaresse et al., 1999).

163 From a comparison of Figs. 1 and 2, one can see that at  $L < 2.5$  (especially at  $L < 1.4$ ) the proton  
164 fluxes during solar minima (Fig. 1) are higher than during maxima (Fig. 2). In addition, in the

165 former the inner edge of the proton belt is less steep and it can reach smaller  $L$  shells (for  $E > 1$   
166 MeV). The distributions of protons in the space  $\{\mu, L\}$  (see, e.g., Kovtyukh,(2016a,b) , which **I**  
167 **have been** constructed from Figs. 1 and 2 confirm these conclusions.

168 In Figs. 1 and 2, the iso-lines of proton fluxes are almost parallel to each other on  $L > 3$  at  
169 sufficiently high energies. Since these iso-lines have separated from each other by approximately  
170 equal intervals on a logarithmic scale of the energy, this region in the space  $\{E, L\}$  corresponds to  
171 power-law spectra of the ERB protons: for power-law spectra,  $J \propto E^{-\gamma}$ , **where the** index  $\gamma = -$   
172  $\Delta(\log J)/\Delta(\log E)$ . In these figures, this region is located between the green and red lines.

173 The red line corresponds to the lower boundary ( $E_b$ ) of the power-law tail of the proton spectra.  
174 For this line,  $E_b \sim 36 \times L^{-3}$  MeV. Some changes in the slope of these iso-lines at  $L > 6$  can be  
175 connected to a discrepancy between the real configuration of the magnetic field lines **of the**  
176 **magnetic field** and the dipolar configuration (used here for  $L$  shells calculation).

177 For the dipole magnetic field region, the points on the red line correspond to particles with a  
178 specific value of the 1<sup>st</sup> adiabatic invariant of motion ( $\mu_b$ ). For Figs. 1 and 2, the average value  $\mu_b$   
179 is  $\sim 1.16$  keV nT<sup>-1</sup>. Segments of an iso-lines, that are parallel to the red line, also correspond to  
180 certain values of the invariant  $\mu$ . In this region of the space  $\{E, L\}$  the ionization and other losses  
181 of the ERB protons during radial drift can be neglected, and changes of fluxes with changing  $L$  are  
182 practically reduced to adiabatic transformations in a magnetic field.

183 It results from these figures that at  $L = 3-6$ , the value  $\gamma = 4.8 \pm 0.5$ . At  $L > 6$  the distances  
184 between these iso-lines **are increased** with  $L$ , and the value  $\gamma$  is decreased from  $\sim 4.7-5.0$  at  $L = 6$   
185 to  $\sim 4.1-4.5$  at  $L = 8$ . This is due to the deviation of the magnetic field from the dipole  
186 configuration as well as to the increasing variability of this field with increasing  $L$ .

187 According to the data of satellites considered in (Kovtyukh, 2001), invariant parameters  $\mu_b$  and  $\gamma$   
188 were found only at  $L > 3$ . In this work, a wider range of  $L$  and  $E$  is considered, and for protons with  
189  $E > 10$  MeV these parameters can be traced to  $L \sim 2$ . At  $L = 2$ ,  $\gamma = 4.4 \pm 0.6$  (Fig. 1) and  $\gamma = 4.7 \pm 1.3$   
190 (Fig. 2). This is due to the fact that the energy range is significantly extended toward higher values  
191 (up to 200 MeV), but here the ionization losses for protons rapidly decrease (see, e.g., Schulz and  
192 Lanzerotti, 1974; Kovtyukh, 2016a).

## 193 2.2 Spatial-energy structure of the helium ion fluxes

194 In Figs. 3 and 4 helium ions fluxes, averaged for quiet periods ( $Kp < 2$ ), are presented.

195 Figure 3 **represents sums up** results from the satellites Molnija-2 (Panasyuk et al., 1977),  
196 Prognoz-5 (Lutsenko and Nikolaeva, 1978), ISEE-1: The International Sun-Earth Explorer 1  
197 (Hovestadt et al., 1981); Akebono or EXOS-D: Exospheric Satellite D and ETS-VI: Engineering Test  
198 Satellite (Goka et al., 1999). These results have been collected during minimum periods of various  
199 solar cycles, i.e. between 20<sup>th</sup> **and /** 21<sup>th</sup> (1975–1977), **between** 21<sup>th</sup> **and /** 22<sup>th</sup> (1984–1985), and  
200 **between** 22<sup>th</sup> **and /** 23<sup>th</sup> (1994–1996) of the solar activity cycles.

201 Figure 4 **represents sums up** results from the satellites OV1-19: Orbiting Vehicle 1-19 (Blake et  
202 al., 1973; Fennell and Blake, 1976), Explorer-45 (Fritz and Spjeldvik, 1978, 1979; Spjeldvik and  
203 Fritz, 1981), SCATHA: Spacecraft Charging At High Altitudes (Blake and Fennell, 1981; Chenette  
204 et al., 1984). These results were obtained during maximum periods of **solar-eyes:** 20<sup>th</sup> (1968–  
205 1971) and 21<sup>th</sup> (1979) **solar cycles**.

206 From a comparison of Figs. 1–2 with Figs. 3–4, one can see that at  $L > 2$  for helium ions the  
207 solar-cyclic (11-year) variations are greater than for protons. For example, at  $L \sim 2-3$  from  
208 maximum to minimum of solar activity fluxes of protons with  $E > 1$  MeV practically do not  
209 **changed**, and the fluxes of helium ions with  $E > 1$  MeV/n are increased by one order of magnitude.

210 Figures 3 and 4 **have show** the same patterns as for protons, but the distribution of helium ion  
211 fluxes is slightly shifted towards higher values of  $L$  shell (with respect to protons). Unlike protons,



212 there are significant “white spots” in these figures: **because there are** no experimental data for  
213 helium ions in these regions.

214 The red line on these figures corresponds to the lower boundary of the power-law tail of the  
215 helium ions spectra. For this line,  $E_b/M_i \sim 43.4 \times L^{-3}$  MeV/n (Fig. 3) and  $E_b/M_i \sim 21.7 \times L^{-3}$  MeV/n  
216 (Fig. 4). If one takes into account that at  $L < 6$  for helium ions with  $E > 0.2$  MeV/n the average  
217 charge  $Q_i = +2$  (see, e.g, Spjeldvik, 1979), then for the considered boundary we get:  $\mu_b \sim 1.4 \times Q_i$   
218 keV/n $\times$ nT $^{-1}$  at the maximum of solar activity and  $\mu_b \sim 1.4 \times M_i$  keV/n $\times$ nT $^{-1}$  at the minimum of solar  
219 activity (for the dipole magnetic field region). The iso-lines of helium ion fluxes in Figs. 3 and 4,  
220 which pass above the red line at  $L > 2.5$ , correspond to an average value of  $\gamma \sim 5.5$ .

221 For helium ions spectra, as for protons ones, the values of the parameters of the power-law tail  
222 are in good agreement with what has been found in (Kovtyukh, 2001).

223 At the same time, one can see that the iso-lines of the fluxes of helium ions in the region above  
224 the red line (**i.e.** in the region of power-law spectra) substantially deviate from the slope of the red  
225 line. At  $L > 3$  the fluxes of helium ions with given energy are increase with decreasing  $L$  slower  
226 than expected from adiabatic transformation (see Kovtyukh, 2001). This means that the ionization  
227 losses of the ERB helium ions significantly exceed these losses for protons, in agreement to well-  
228 known calculations (see, e.g., Schulz and Lanzerotti, 1974).

### 229 2.3 Spatial-energy structure of the CNO group ions fluxes

230 In Figs. 5 and 6 CNO group ions fluxes, averaged for quiet periods ( $K_p < 2$ ), are presented.

231 Figure 5 **represents sums up** results from the satellites ATS-6: Applications Technology  
232 Satellite 6 (Spjeldvik and Fritz, 1978; Fritz and Spjeldvik, 1981) and ISEE-1: The International  
233 Sun-Earth Explorer 1 (Hovestadt et al., 1978). These results have been collected during minimum  
234 period between 20<sup>th</sup> and / 21<sup>th</sup> of the solar activity cycles (1974–1975, 1977).

235 Figure 6 **represents sums up** results from the satellite Explorer-45 (Spjeldvik and Fritz, 1978;  
236 Fritz and Spjeldvik, 1981). These results were obtained during maximum period of **solar** activity in  
237 20<sup>th</sup> solar cycle (1971–1972).

238 On Figs. 5–6 the spatial-energy patterns of the ion fluxes of the CNO group are even more  
239 shifted towards higher values of  $L$  shell and its configuration differ significantly from Figs. 1–4.

240 From a comparison of Figs. 1–2 with Figs. 5–6 one can see that, for ions of CNO group, the  
241 solar-cyclic (11-year) variations are greater than for protons. For example, at  $L \sim 3$ –5 from  
242 maximum to minimum of solar activity fluxes of protons with  $E > 1$  MeV practically do not  
243 changed, but the fluxes of the CNO group increase by one order of magnitude or more. From a  
244 comparison of Figs. 3–4 with Figs. 5–6 it is seen also that the fluxes of CNO group change several  
245 times more than the fluxes of helium ions do.

246 This **is** means that, for ions of the CNO group, the ionization losses at  $L = 3$ –5 are much larger  
247 than for ions with  $Z \leq 2$  and these losses have a significant effect even on the power-law segment  
248 of the spectra of the CNO ions (in the part which is seen on Figs. 5–6). Therefore, the lower  
249 boundary of the power-law tail of these ions spectra have not **monitored-on been obtained by**  
250 **the data-given experiments collected** in Figs. 5 and 6. The red line on these figures corresponds to  
251 adiabatic laws (see Kovtyukh, 2001); this line let us estimate the deviations from these laws. As  
252 can be seen from Fig. 5–6, ionization losses for ions of the CNO group are especially large at the  
253 **maximum peak** of solar activity (Fig. 6): **in during** these times, the slope of iso-lines on  $L > 3$  is  
254 significantly less than the slope of the red line.

255 At the same time, at  $L > 4$  in Fig. 5 and at  $L > 3$  in Fig. 6, the iso-lines of fluxes pass almost  
256 parallel to each other and at approximately equal distances from each other; the average value of  $\gamma$   
257 corresponding to them is  $\sim 6$ . Thus, for sufficiently large values of  $E$  and  $L$ , the CNO group ions  
258 spectra in the ERB have a power-law form, but these spectra are softer in comparison with the  
259 spectra of protons.

260 The red line corresponds here to the dependences  $E_b/M_i \approx 43.4 \times L^{-3}$  MeV/n (on Fig. 5) and  $E_b/M_i$   
 261  $\sim 12.4 \times L^{-3}$  MeV/n (on Fig. 6), which are taken from (Kovtyukh, 2001) where this boundary was  
 262 more clearly defined also for the ions of the CNO group. If one takes into account that at  $L \sim 3-5$   
 263 for the CNO group ions with  $E > 0.1$  MeV/n the average charge  $Q_i = +4$  (see, e.g., Spjeldvik and  
 264 Fritz, 1978), then for this boundary one can get:  $\mu_b \sim 1.4 \times Q_i$  keV/n  $\times$  nT $^{-1}$  at the maximum of solar  
 265 activity and  $\mu_b \sim 1.4 \times M_i$  keV/n  $\times$  nT $^{-1}$  at the **minima minimum** of solar activity (for the dipole  
 266 magnetic field region).

### 267 3 Discussion

268 Let us consider the conclusions following ~~from~~ the results obtained here for solar-cyclic variations  
 269 in the fluxes of ERB ions. Solar-cyclic (11-year) variations of proton fluxes with  $E > 1$  MeV in the  
 270 inner region of the ERB have been studied in many works (see, e.g., Pizzella et al., 1962; Hess,  
 271 1962; Blanchard and Hess, 1964; Filz, 1967; Nakano and Heckman, 1968; Vernov, 1969; Dragt,  
 272 1971; Huston et al., 1996; Vacaresse et al., 1999; Kuznetsov et al., 2010; Qin et al., 2014). These  
 273 variations reach one order of magnitude at  $L = 1.14$  and **are reduced** rapidly with increasing  $L$  (see,  
 274 e.g., Vacaresse et al., 1999).

275 In these works, such variations of the proton fluxes of the inner belt are connected to the solar-  
 276 cyclic variations of the energy loss rates of protons in this region. However, solar-cyclic variations  
 277 of fluxes of ions with  $Z \geq 2$  have not **been** considered in these works.

278 In quiet periods, only the mechanism of ionization losses is significant for the ERB protons  
 279 trapped ~~on~~ **in** small  $L$  shells (see, e.g., Schulz and Lanzerotti, 1974). Energy loss rates and lifetimes  
 280 of the ERB protons are determined, in this mechanism, by the density of atmospheric atoms and  
 281 ionospheric plasma ( $N$ ) in a geomagnetic trap. This density depends on the intensity of the  
 282 ultraviolet radiation of the Sun.

283 With decreasing solar activity (with a transition from maximum to minimum of the solar cycle),  
 284 the densities of atmospheric atoms and ionospheric plasma in a geomagnetic trap are decreased. If  
 285 the proton supply rates to the inner belt, under the action of the CRAND mechanism, remain  
 286 unchanged or the effect of these changes is weaker than the effect connected with changes of loss  
 287 rates of the protons, the stationary proton fluxes will increase with decreasing ~~the~~ solar activity.

288 The lifetimes of protons increase with  $L$ ; this leads to a decrease in the amplitude of the solar-  
 289 cyclic variations of proton fluxes. **The A** proton lifetime on a given  $L$  shell depends on its energy  
 290 and is less than 11 years at  $L < L^*(E)$ . For example, for protons with  $E \sim 10$  MeV the value  $L^*$  is  $\sim$   
 291 2.5 (see, e.g., Kovtyukh, 2016a). Figs. 1 and 2 show that for protons the solar-cyclic variations of  
 292 fluxes are small and localized at  $L < 2.5$  (mainly at  $L < 1.4$ ).

293 In contrast to protons, Figs. 3–6 show significant solar-cyclic variations of fluxes of helium ions  
 294 and CNO group ions at  $L \sim 2-5$ . These variations can be explained by the same mechanism, that  
 295 has been suggested for protons at  $L < 2.5$ .

296 For ions with  $Z \geq 2$  in the ERB, ionization losses are more significant than for protons and this  
 297 can be connected to the absence of ions with  $Z \geq 2$  at  $L < 2$  (or very low values of these fluxes)  
 298 during quiet geomagnetic conditions. Such short lifetimes are manifested also in the slope of the  
 299 experimental curves in Fig. 4 and 6 (this was noted **in** sections 2.2 and 2.3, respectively).  
 300 Consequently, for ions with  $Z \geq 2$ , the regions in which variations can manifest~~ed~~, should be  
 301 located on higher  $L$  shells (at the same energies as for protons).

302 The lifetimes of ions in the energy ranges considered here are  $\tau \propto M_i^{-1/2} Q_i^{-2} N^{-1} E^{3/2}$  (Schulz and  
 303 Lanzerotti, 1974). In a first approximation, for  $N \propto L^{-4}$ , we obtain the value  $L_i^* \sim (M_i^{1/2} Q_i^2)^{1/4} L^*$ ,  
 304 where  $L^*$  corresponds to **the L shell of** protons of the same energy of the other ions under study. For  
 305 helium ions ( $M_i = 4$ ,  $Q_i = 2$ ) with  $E \sim 10$  MeV, we obtain  $L_i^* \sim 4.2$ . For ions of CNO group ( $M_i = 14$ ,

306  $Q_i = 4$ ) with  $E \sim 10$  MeV we obtain  $L_i^* \sim 6.9$ . These are very rough estimations, but they are in  
307 agreement with the results presented in Figs. 3–6.

308 These estimates are based on the following assumption: during variations in solar activity, the rates  
309 of ion supply on  $L < L_i^*$  remains unchanged (or these changes are weaker than the effect of changes of  
310 the rate of ion losses). This assumption is real for protons with  $E > 10$ – $20$  MeV at  $L < 2.2$ ; in fact,  
311 ~~the fluxes of~~ these protons form mainly under the action of the CRAND mechanism. However, at  $L >$   
312  $2.2$  the stationary ion fluxes of the ERB form mainly under the action of radial diffusion (see, e.g.,  
313 Schulz and Lanzerotti, 1974; Kovtyukh, 2016b, 2018). Therefore, the solar-cyclic variations of  $Z \geq 2$   
314 ion fluxes can be motivated only under the assumption that the effect related with an increase in the  
315 ionization losses of such ions significantly exceeds the effect connected with the possible enhance of  
316 radial diffusion of ions ~~on~~ during the rising phase of solar activity.

317 In the experimental results presented here for the ERB ions, the region of the power-law tail of  
318 the ion spectra is distinguished. For many experiments, especially for heavy ions, the values of the  
319 parameter of a power-law tail spectra are determined much more accurately by the dependences  
320  $J(L)$  of the ion fluxes (in logarithmic scale) for different pairs of energy channels (see Kovtyukh,  
321 2001). For example, the range of  $L$ , in which these dependences for two energy channels are  
322 parallel to each other is connected to the power-law tail of the spectra. Instead, on smaller values  
323 of  $L$ , these fluxes begin to converge and the radial dependences of these fluxes intersect with each  
324 other, which is related to the maximum in the spectra.

325 The main source of ions in the outer regions of the ERB is the solar wind, and usually the high-  
326 energy part of these spectra have an exponential shape (see, e.g., Ipavich et al., 1981a, 1981b).  
327 Immediately before being captured into the magnetosphere, these ions pass through a highly  
328 turbulized regions, but the high-energy part of their spectra usually retains an exponential shape.  
329 Therefore, the question arises: what physical mechanism converts the form of ion spectra from  
330 exponential to power-law?

331 Evidently, the power-law tail of the ERB ions spectra must be generated in the outer regions of  
332 the magnetosphere. The most likely region for this to happen is the plasma sheet (PS) of the  
333 magnetospheric tail, which is adjacent to the geomagnetic trap. The high-energy part of the ion  
334 spectra in the PS, at  $R \sim 20$ – $40 R_E$ , have has a power-law shape and the exponents of these spectra  
335 is are close to the corresponding parameters of the spectra of ions in the ERB. On the data of the  
336 satellites IMP-7 and IMP-8 (Sarris et al., 1981; Lui et al., 1981) and also satellite ISEE-1 (Christon  
337 et al., 1991), the shape of the ion spectra of the PS usually do not change during substorms; they  
338 produce only parallel shifts of the spectra along logarithmic axes  $E$  and  $J$ . These results point out  
339 that the time scales of formation processes of these ion spectra in the PS exceed the times of  
340 substorms.

341 Parameters of the power-law tail of the ion spectra of the outer belt ( $\gamma$  and  $\mu_b$ ) reflect,  
342 apparently, the most fundamental features of the mechanisms of acceleration of ions in the tail of  
343 the magnetosphere. One can try to connect the values of these parameters with the most general  
344 representations of the mechanisms of ion acceleration in the PS of the magnetospheric tail.

345 Most likely, this part of the ion energy spectra is formed in the PS by stochastic mechanisms of  
346 ion acceleration; this hypothesis is supported by many experimental results. The statistical aspect  
347 of these mechanisms reveals itself, in particular, in the fact that the ratios of fluxes (and partial  
348 densities) of ions with different  $Z$  can differ, even greatly, at low and high energies. During their  
349 wander in the phase space, ions gradually loose information about their origin and, therefore, the  
350 high-energy tails of their spectra contain ambiguous information on the partial densities of  
351 different components of ions in the source (see, e.g., Kovtyukh, 2001).

352 The high-energy part of the ion spectra of the PS can be generated by the mechanisms of  
353 acceleration of particles on magnetic irregularities moving with respect to each other (Fermi  
354 mechanism). The fractal structures of the PS are revealed on scales from  $\sim 0.4$  to  $\sim 8$  thousands  
355 kilometers, for example, in the data of the satellite Geotail (Milovanov et al., 1996). If the mass of



356 the ions are small compared to the mass of the magnetic irregularities in the PS, the average values  
357 of the index  $\gamma$  of the power-law tail should not depend on mass and charge of such nuclei.

358 Under equilibrium conditions, this parameter is determined by the average part of energetic ions  
359 in the total energy density of particles and magnetic irregularities ( $\bar{\beta}$ ). From the theory which was  
360 developed by Ginzburg and Syrovatskii (1964), it follows:  $\gamma - 1 \approx (1 - \bar{\beta})^{-1}$ . With increasing  $\bar{\beta}$  in  
361 the interval  $0 < \bar{\beta} < 1$ , the value  $\gamma$  increases monotonically and  $\gamma \rightarrow \infty$  for  $\bar{\beta} \rightarrow 1$ . For real  
362 average values  $\bar{\beta}$  in the central PS, we get  $\gamma \sim 3.5-7.0$  ( $\gamma \sim 4.3$  at  $\bar{\beta} \sim 0.7$ ).

363 Spectra with power-law tail and quasi-exponential segment at lower energies can be generated  
364 when the value  $\Delta B / \bar{B}$  for magnetic irregularities is proportional to their size  $\delta r$  and their spectral  
365 density decreases rapidly with increasing  $\delta r$  for  $\delta r < r_s$ , but for  $\delta r > r_s$  it remains almost  
366 unchanged. Apparently, the spectra of magnetic irregularities in PS with thickness  $r_s$  have just such  
367 form. Then, the lower boundary  $\mu_b$  of the power-law tail corresponds to the condition  $r_s / \rho_i \sim 10$  ( $\rho_i$   
368 is the gyroradius of ions), i.e.  $\mu_b \sim 0.02(Q_i^2 / M_i) B_s r_s^2$  keV nT<sup>-1</sup>, where  $B_s$  is the average magnetic  
369 field induction in the PS (in nT) and  $r_s$  is normalized to the Earth's radius. ~~Believing that~~ Using  $B_s$   
370  $\sim 30$  nT and  $r_s \sim 1.3 R_E$  it can be obtained:  $\mu_b \sim 1.0 (Q_i^2 / M_i)$  keV nT<sup>-1</sup>.

371 The energy spectra of ions in the radiation belts of such planets as Jupiter and Saturn have the  
372 form analogous to that of ion spectra in the ERB (see, e.g., Krimigis et al., 1981; Cheng et al.,  
373 1985). As that in the ERB, these spectra have a long power-law tail, which is formed, apparently,  
374 by mechanisms of stochastic acceleration of ions as a result of **their** interactions ~~of these ions~~ with  
375 the current layer of the magnetospheric tail.

## 376 5 Conclusions

377 In this work, the experimental results for the stationary fluxes of the main ion components of the  
378 ERB (protons, helium ions and ions of the CNO group) in the near equatorially plane, have been  
379 analyzed. It ~~is~~ **has been** found that in the outer belt these fluxes line up in the certain regular  
380 patterns in the space  $\{E, L\}$ . The degree of such similarity increases with increasing  $E$  and  $L$  and it  
381 is linked to the nature of the main sources and on the universality mechanisms of transfer,  
382 acceleration and losses of ERB ions in the outer belt (radial diffusion ~~while conserving~~ **which**  
383 **conserves**  $\mu$  and  $K$  of ions, betatron acceleration and ionization losses).

384 Moreover, solar-cyclic (11-year) variations of the spatial-energy distributions of the ERB ion  
385 fluxes have been investigated. It has been noted that the ERB ions fluxes are weaker with  
386 increasing solar activity and this effect increases with increasing atomic number  $Z$ . ~~Such a~~ **This**  
387 **kind of** dependence of the amplitude of flux changes on  $Z$  is typical, also, for faster variations in  
388 the fluxes of the ERB ions, during geomagnetic storms and other disturbances of the Earth's  
389 magnetosphere, as has been underlined in the review Kovtyukh (2018).

390 The figures presented here make it possible to determine in which regions of the space  $\{E, L\}$   
391 near the equatorial plane the ionization losses of ions during their radial diffusion can be neglected  
392 and where this cannot. These results indicate also that with variations in the level of solar activity  
393 the coefficient  $D_{LL}$  of the radial diffusion of the ERB ions change much less than the ionization  
394 losses rates of ions with  $Z \geq 2$ .

395 In addition, the figures given here reveal the localization of “white spots”, especially extensive for  
396 ions with  $Z \geq 2$  and  $E > 1$  MeV/n at  $L < 3$ . As  $Z$  and energy become larger and  $L$  becomes smaller,  
397 the uncertainties in the values of the ERB fluxes become larger. These gaps must be filled by the  
398 results of future experiments on satellites; for now, the extensive gaps in ~~the experimental data for~~  
399 ~~fluxes of ions with~~  $Z \geq 2$  **ion data** do not allow to create sufficiently complete and reliable empirical  
400 models of the ERB for these ions.

401

402 **Acknowledgements.** The author are very grateful to the reviewers for their very important and  
403 fruitful comments and proposals for the paper.

404 **Financial support.** This work was supported by Russian Foundation for Basic Research RFFI  
405 grant No. 17-29-01022.

## 406 **References**

- 407 Alfvén, H., and Fälthammar, C.-G.: *Cosmical Electrodynamics, Fundamental Principles*,  
408 Clarendon Press, Oxford, 1963.
- 409 Albert, J. M., Ginet, G. P., and Gussenhoven, M. S.: CRRES observations of radiation belt protons,  
410 1, Data overview and steady state radial diffusion, *J. Geophys. Res.*, **103**(A5), 9261–9273.  
411 <https://doi.org/10.1029/97JA02869>, 1998.
- 412 Blake, J. B., and Fennell, J. F.: Heavy ion measurements in the synchronous altitude region, *Planet.*  
413 *Space Sci.*, **29**(11), 1205–1213, [https://doi.org/10.1016/0032.0633\(81\)90125-2](https://doi.org/10.1016/0032.0633(81)90125-2), 1981.
- 414 Blake, J. B., Fennell, J. F., Schulz, M., and Paulikas, G. A.: Geomagnetically trapped alpha  
415 particles, 2, The inner zone, *J. Geophys. Res.*, **78**(25), 5498–5506,  
416 <https://doi.org/10.1029/JA078i025p05498>, 1973.
- 417 Blanchard, R. C., and Hess, W. N.: Solar cycle changes in inner-zone protons, *J. Geophys. Res.*,  
418 **69**(19), 3927–3938, <https://doi.org/10.1029/JZ069i019p03927>, 1964.
- 419 Chenette, D. L., Blake, J. B., and Fennell, J. F.: The charge state composition of 0.4–MeV helium  
420 ions in the Earth’s outer radiation belts during quiet times, *J. Geophys. Res.*, **89**(A9), 7551–  
421 7555, <https://doi.org/10.1029/JA089iA09p07551>, 1984.
- 422 Cheng, A. F., Krimigis, S. M., and Armstrong, T. P.: Near equality of ion phase space densities at  
423 Earth, Jupiter, and Saturn, *J. Geophys. Res.*, **90**(A9), 526–530,  
424 <http://doi.org/10.1029/JA090iA01p00526>, 1985.
- 425 Christon, S. P., Williams, D. J., Mitchell, D. G., Huang, C. Y., and Frank, L. A.: Spectral  
426 characteristics of plasma sheet ion and electron populations during disturbed geomagnetic  
427 conditions, *J. Geophys. Res.*, **96**(A1), 1–22, <https://doi.org/10.1029/90JA01633>, 1991.
- 428 Croley, D. R., Jr., Schulz, M., and Blake, J. B.: Radial diffusion of inner-zone protons:  
429 Observations and variational analysis, *J. Geophys. Res.*, **81**(4), 585–594,  
430 <https://doi.org/10.1029/JA081i004p00585>, 1976.
- 431 Dragt, A. J.: Solar cycle modulation of the radiation belt proton flux, *J. Geophys. Res.*, **76**(10),  
432 2313–2344, <https://doi.org/10.1029/JA076i010p02313>, 1971.
- 433 Fennell, J. F., and Blake, J. B.: Geomagnetically trapped  $\alpha$ -particles, *Magnetospheric Particles and*  
434 *Fields*, edited by: McCormac, B. M., D. Reidel, Dordrecht, Holland, 149–156, 1976.
- 435 Filz, R. C.: Comparison of the low-altitude inner-zone 55–MeV trapped proton fluxes measured in  
436 1965 and 1961–1962, *J. Geophys. Res.*, **72**(3), 959–963,  
437 <https://doi.org/10.1029/JZ072i003p00959>, 1967.
- 438 Freden, S. C., Blake, J. B., and Paulikas, G. A.: Spatial variation of the inner zone trapped proton  
439 spectrum, *J. Geophys. Res.*, **70**(13), 3113–3116, <https://doi.org/10.1029/JZ070i013p03113>,  
440 1965.
- 441 Fritz, T. A., and Spjeldvik, W. N.: Observations of energetic radiation belt helium ions at the  
442 geomagnetic equator during quiet conditions, *J. Geophys. Res.*, **83**(A6), 2579–2583,  
443 <https://doi.org/10.1029/JA083iA06p02579>, 1978.
- 444 Fritz, T. A., and Spjeldvik, W. N.: Simultaneous quiet time observations of energetic radiation belt  
445 protons and helium ions: The equatorial  $\alpha/p$  ratio near 1 MeV, *J. Geophys. Res.*, **84**(A6),  
446 2608–2618, <https://doi.org/10.1029/JA084iA06p02608>, 1979.
- 447 Fritz, T. A., and Spjeldvik, W. N.: Steady-state observations of geomagnetically trapped energetic  
448 heavy ions and their implications for theory, *Planet. Space Sci.*, **29**(11), 1169–1193,  
449 [https://doi.org/10.1016/0032-0633\(81\)90123-9](https://doi.org/10.1016/0032-0633(81)90123-9), 1981.

450 Ginzburg, V. L., and Syrovatskii, S. I.: The Origin of Cosmic Rays, Pergamon Press, Oxford,  
451 1964.

452 Ginet, G. P., O'Brien, T. P., Huston, S. L., Johnston, W. R., Guild, T. B., Friedel, R., Lindstrom,  
453 C. D., Roth, C. J., Whelan, P., Quinn, R. A., Madden, D., Morley, S., and Su, Yi-J.: AE9, AP9  
454 and SPM: New models for specifying the trapped energetic particle and space plasma  
455 environment, *Space Sci. Rev.*, **179**(1–4), 579–615, <https://doi.org/10.1007/s11214-013-9964-y>,  
456 2013.

457 Goka, T., Matsumoto, H., and Takagi, S.: Empirical model based on the measurements of the  
458 Japanese spacecrafts, *Radiation Measurements*, **30**(5), 617–624, [https://doi.org/10.1016/S1350-4487\(99\)00237-1](https://doi.org/10.1016/S1350-4487(99)00237-1), 1999.

460 Hess, W. N.: Discussion of paper by Pizzella, McIlwain, and Van Allen, 'Time variations of  
461 intensity in the Earth's inner radiation zone, October 1959 through December 1960', *J.*  
462 *Geophys. Res.*, **67**(12), 4886–4887, <https://doi.org/10.1029/JZ0670i012p04886>, 1962.

463 Hovestadt, D., Häusler, B., and Scholer, M.: Observation of energetic particles at very low  
464 altitudes near the geomagnetic equator, *Phys. Rev. Lett.*, **28**(20), 1340–1343,  
465 <https://doi.org/10.1103/PhysRevLett.28.1340>, 1972.

466 Hovestadt, D., Gloeckler, G., Fan, C. Y., Fisk, L. A., Ipavich, F.M., Klecker, B., O'Gallagher, J. J.,  
467 and Scholer, M.: Evidence for solar wind origin of energetic heavy ions in the Earth's radiation  
468 belt, *Geophys. Res. Lett.*, **5**(12), 1055–1057, <https://doi.org/10.1029/GL005i012p01055>, 1978.

469 Hovestadt, D., Klecker, B., Mitchell, E., Fennell, J. F., Gloeckler, G., and Fan, C. Y.: Spatial  
470 distribution of  $Z \geq 2$  ions in the outer radiation belt during quiet conditions, *Adv. Space Res.*,  
471 **1**(1), 305–308, [https://doi.org/10.1016/0273-1177\(81\)90125-3](https://doi.org/10.1016/0273-1177(81)90125-3), 1981.

472 Huston, S., Kuck, G., and Pfitzer, K.: Low-altitude trapped radiation model using TIROS/NOAA  
473 data, *Radiation Belts: Models and Standards*, edited by: Lemaire, J. F., Heynderickx, D., and  
474 Baker, D. N., AGU, Washington, D. C., 119–122, <https://doi.org/10.1029/GM097/p0119>, 1996.

475 Ilyin, B. D., Kuznetsov, S. N., Panasyuk, M. I., and Sosnovets, E.N.: Non-adiabatic effects and  
476 boundary of the trapped protons in the Earth's radiation belts, *Bulletin of the Russian Academy*  
477 *of Sciences: Physics*, **48**(11), 2200–2203, 1984.

478 Ipavich, F. M., Galvin, A. B., Gloeckler, G., Scholer, M., and Hovestadt D.: A statistical survey of  
479 ions observed upstream of the Earth's bow shock: Energy spectra, composition, and spatial  
480 variation, *J. Geophys. Res.*, **86**(A6), 4337–4342, <https://doi.org/10.1029/JA086iA06p4337>,  
481 1981a.

482 Ipavich, F. M., Scholer, M., and Gloeckler, G.: Temporal development of composition, spectra,  
483 and anisotropies during upstream particle events, *J. Geophys. Res.*, **86**(A13), 11153–11160,  
484 <https://doi.org/10.1029/JA086iA13p11153>, 1981b.

485 Kovtyukh, A. S.: Geocorona of hot plasma, *Cosmic Res.*, **39**(6), 527–558,  
486 <https://doi.org/10.1023/A:1013074126604>, 2001.

487 Kovtyukh, A. S.: Radial dependence of ionization losses of protons of the Earth's radiation belts,  
488 *Ann. Geophys.*, **34**(1), 17–28, <https://doi.org/10.5194/angeo-34-17-2016>, 2016a.

489 Kovtyukh, A. S.: Deduction of the rates of radial diffusion of protons from the structure of the  
490 Earth's radiation belts, *Ann. Geophys.*, **34**(11), 1085–1098. [https://doi.org/10.5194/angeo-34-1085-](https://doi.org/10.5194/angeo-34-1085-2016)  
491 2016, 2016b.

492 Kovtyukh, A. S.: Ion Composition of the Earth's Radiation Belts in the Range from 100 keV to  
493 100 MeV/nucleon: Fifty Years of Research, *Space Sci. Rev.*, **214**(8), 124:1–124:30,  
494 <https://doi.org/10.1007/s11214-018-0560-z>, 2018.

495 Krimigis, S. M.: Alpha particles trapped in the Earth's magnetic field, *Particles and Fields in the*  
496 *Magnetosphere*, edited by: McCormac, B. M., D. Reidel, Dordrecht, Holland, 364–379, 1970.

497 Krimigis, S. M., Carbary, J. F., Keath, E. P., Bostrom, C. O., Axford, W. I., Gloeckler, G.,  
498 Lanzerotti, L. J., and Armstrong, T. P.: Characteristics of hot plasma in the Jovian  
499 magnetosphere: Results from the Voyager spacecraft, *J. Geophys. Res.*, **86**(A10), 8227–8257.  
500 <https://doi.org/10.1029/JA086iA10p08227>, 1981.

- 501 Kuznetsov, N. V., Nikolaeva, N. I., and Panasyuk, M. I.: Variation of the trapped proton flux in the  
502 inner radiation belt of the Earth as a function of solar activity, *Cosmic Res.*, **48**(1), 80–85,  
503 <https://doi.org/10.1134/S0010952510010065>, 2010.
- 504 Lui, A. T. Y., and Krimigis, S. M.: Several features of the earthward and tailward streaming of  
505 energetic protons (0.29–0.5 MeV) in the Earth's plasma sheet, *J. Geophys. Res.*, **86**(A13),  
506 11173–11188, <https://doi.org/10.1029/JA086iA13p11173>, 1981.
- 507 Lutsenko, V. N., and Nikolaeva, N. S.: Relative content and the range of alpha particles in the  
508 inner radiation belt of the Earth by measurements on satellite Prognoz-5, *Cosmic Res.*, **16**(3),  
509 459–462, 1978.
- 510 McIlwain, C. E.: Coordinate for mapping the distribution of magnetically trapped particles, *J.*  
511 *Geophys. Res.*, **66**(11), 3681–3691, <https://doi.org/10.1029/JZ066i011p03681>, 1961.
- 512 Milovanov, A. V., Zelenyi, L. M., and Zimbardo, G.: Fractal structures and power low spectra in  
513 the distant Earth's magnetotail, *J. Geophys. Res. Space Phys.*, **101**(A9), 19903–19910,  
514 <https://doi.org/10.1029/96JA01562>, 1996.
- 515 Nakano, G., and Heckman, H.: Evidence for solar-cycle changes in the inner-belt protons, *Phys.*  
516 *Rev. Lett.*, **20**(15), 806–809, <https://doi.org/10.1103/PhysRevLett.20.806>, 1968.
- 517 Northrop, T. G.: *The Adiabatic Motion of Charged Particles*, Wiley-Interscience, NY, USA, 1963.
- 518 Panasyuk, M. I., and Sosnovets, E. N.: Differential energy spectrum of low-energy protons in the  
519 inner region of the radiation belt, *Cosmic Res.*, **11**(3), 436–440, 1973.
- 520 Panasyuk, M. I., Reizman, S. Ya., Sosnovets, E. N., and Filatov, V. N.: Experimental results of  
521 protons and  $\alpha$ -particles measurements with energy more 1 MeV/nucleon in the radiation belts,  
522 *Cosmic Res.*, **15**(6), 887–894, 1977.
- 523 Pizzella, G., McIlwain, C. E., and Van Allen, J. A.: Time variations of intensity in the Earth's  
524 inner radiation zone, October 1959 through December 1960, *J. Geophys. Res.*, **67**(4), 1235–  
525 1253, <https://doi.org/10.1029/JZ0670i004p01235>, 1962.
- 526 Pizzella, G., and Randall, B. A.: Differential energy spectrum of geomagnetically trapped protons  
527 with the Injun 5 satellite, *J. Geophys. Res.*, **76**(10), 2306–2312,  
528 <https://doi.org/10.1029/JA076i010p02306>, 1971.
- 529 Qin, M., Zhang, X., Ni, B., Song, H., Zou, H., and Sun, Y.: Solar cycle variations of trapped  
530 proton flux in the inner radiation belt, *J. Geophys. Res. Space Phys.*, **119**(12), 9658–9669,  
531 <https://doi.org/10.1002/2014JA020300>, 2014.
- 532 Sarris, E. T., Krimigis, S. M., Lui, A. T. Y., Ackerson, K. L., Frank, L. A., and Williams, D. J.:  
533 Relationship between energetic particles and plasmas in the distant plasma sheet, *Geophys. Res.*  
534 *Lett.*, **8**(4), 349–352, <https://doi.org/10.1029/GL008i004p0349>, 1981.
- 535 Schulz, M., and Lanzerotti, L. J.: *Particle Diffusion in the Radiation Belts*, Springer, NY, USA,  
536 1974.
- 537 Selesnick, R. S., Hudson, M. K., and Kress, B. T.: Injection and loss of inner radiation belt protons  
538 during solar proton events and magnetic storms, *J. Geophys. Res. Space Phys.*, **115**(A8),  
539 A08211, <https://doi.org/10.1029/2010JA015247>, 2010.
- 540 Selesnick, R. S., Baker, D. N., Jaynes, A. N., Li, X., Kanekal, S. G., Hudson, M. K., and Kress, B.  
541 T.: Observations of the inner radiation belt: CRAND and trapped solar protons, *J. Geophys.*  
542 *Res. Space Phys.*, **119**(8), 6541–6552, <https://doi.org/10.1002/2014JA020188>, 2014.
- 543 Selesnick, R. S., Baker, D. N., Kanekal, S. G., Hoxie, V. C., and Li, X.: Modeling the proton  
544 radiation belt with Van Allen Probes Relativistic Electron-Proton Telescope data, *J. Geophys.*  
545 *Res. Space Phys.*, **123**(1), 685–697, <https://doi.org/10.1002/2017JA024661>, 2018.
- 546 Spjeldvik, W. N.: Expected charge states of energetic ions in the magnetosphere, *Space Sci. Rev.*,  
547 **23**(3), 499–538, <https://doi.org/10.1007/BF00172252>, 1979.
- 548 Spjeldvik, W. N., and Fritz, T. A.: Quiet time observations of equatorially trapped  
549 megaelectronvolt radiation belt ions with nuclear charge  $Z \geq 4$ , *J. Geophys. Res.*, **83**(A9), 4401–  
550 4405, <https://doi.org/10.1029/JA083iA09p04401>, 1978.
- 551 Spjeldvik, W. N., and Fritz, T. A.: Observations of energetic helium ions in the Earth's radiation

552 belts during a sequence of geomagnetic storms, *J. Geophys. Res.*, **86**(A4), 2317–2328,  
553 <https://doi.org/10.1029/JA086iA04p02317>, 1981.

554 Stevens, J. R., Martina, E. F., and White, R. S.: Proton energy distributions from 0.060 to 3.3 MeV  
555 at 6.6 Earth radii, *J. Geophys. Res.*, **75**(28), 5373–5385,  
556 <https://doi.org/10.1029/JA075i028p05373>, 1970.

557 Vacaresse, A., Boscher, D., Bourdarie, S., Blanc, M., and Sauvaud, J. A.: Modeling the high-  
558 energy proton belt, *J. Geophys. Res. Space Phys.*, **104**(A12), 28601–28613,  
559 <https://doi.org/10.1029/1999JA900411>, 1999.

560 Venkatesan, D., and Krimigis, S. M.: Observations of low-energy (0.3– to 1.8-MeV) differential  
561 spectrums of trapped protons, *J. Geophys. Res.*, **76**(31), 7618–7631,  
562 <https://doi.org/10.1029/JA076i031p07618>, 1971.

563 Vernov, S. N.: The Earth's radiation belts. In G. Bozóki, E. Gombosi, A. Sebastyén, A. Somogyi  
564 (Eds.), *Proc. 11<sup>th</sup> ICRC, Budapest*, 85–162, 1969.

565 Westphalen, H., and Spjeldvik, W.N.: On the energy dependence of the radial diffusion coefficient  
566 and spectra of inner radiation belt particles: Analytic solution and comparison with numerical  
567 results, *J. Geophys. Res.*, **87**(A10), 8321–8326, <https://doi.org/10.1029/2000JA087iA10p08321>,  
568 1982.

569 Wilken, B., Baker, D. N., Higbie, P. R., Fritz, T. A., Olson, W. P., and Pfizter, K. A.:  
570 Magnetospheric configuration and energetic particle effects associated with a SSC: A case study  
571 of the CDAW 6 event on March 22, 1979, *J. Geophys. Res.*, **91**(A2), 1459–1473,  
572 <https://doi.org/10.1029/JA091iA02p01459>, 1986.

573 Williams, D. J.: Phase space variations of near equatorially mirroring ring current ions, *J. Geophys.*  
574 *Res.*, **86**(A1), 189–194, <https://doi.org/10.1029/JA086iA01p00189>, 1981.

575 Williams, D. J., and Frank, L. A.: Intense low-energy ion populations at low equatorial altitude, *J.*  
576 *Geophys. Res.*, **89**(A6), 3903–3911, <https://doi.org/10.1029/JA089iA06p03903>, 1984.

577



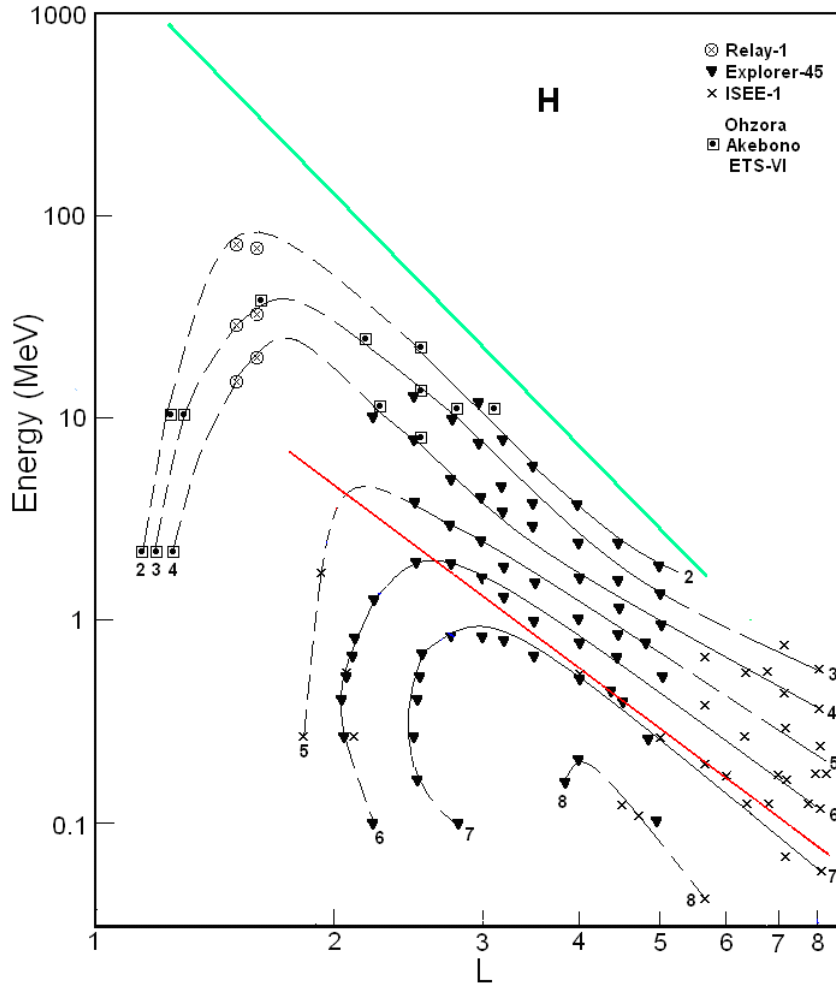

578

579

580 **Figure 1.** Proton fluxes in the ERB near minima of the solar activity. The numbers on the curves refer to the values of  
 581 the decimal logarithms of  $J$ , which where  $J$  is given in units of  $(\text{cm}^2 \text{ s ster MeV})^{-1}$ , is the differential fluxes of protons  
 582 with  $\alpha_0 \approx 90^\circ$  (near the plane of the geomagnetic equator). Data of satellites are associated by with different symbols.  
 583 The red line corresponds to the lower boundary of the power-law tail of the proton spectra; while green line  
 corresponds to the maximum energy of protons trapped in the ERB (Ilyin et al., 1984).

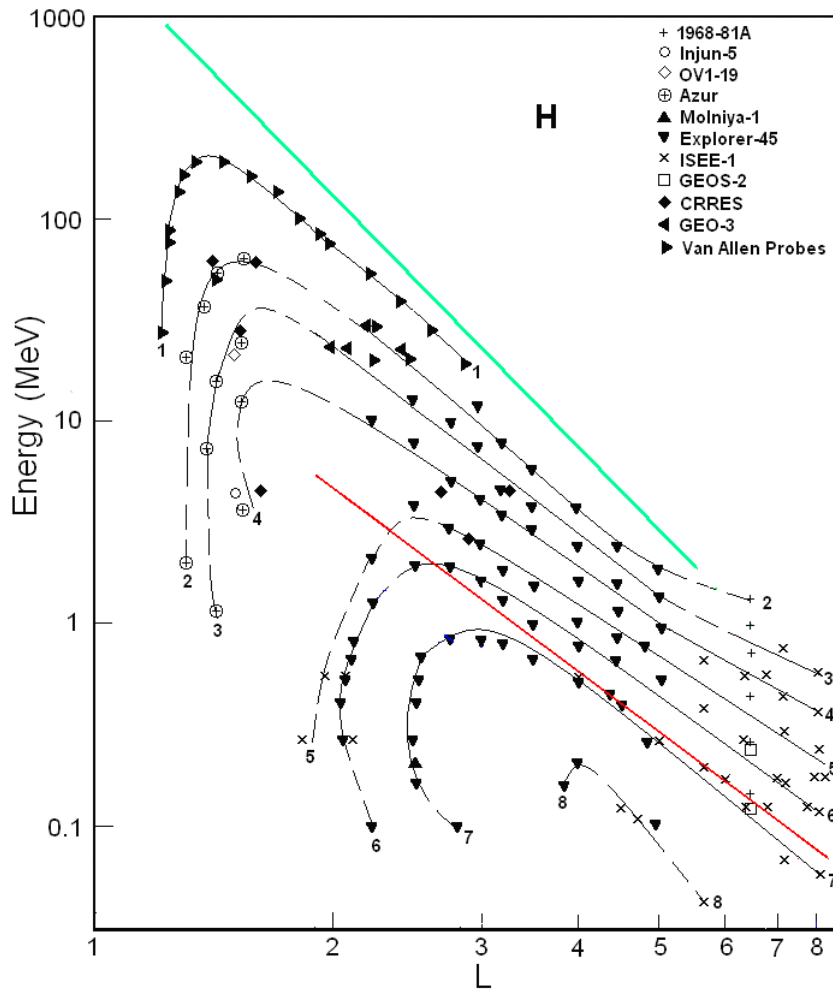

584  
 585  
 586  
 587  
 588  
 589

**Figure 2.** Proton fluxes in the ERB near maxima of the solar activity. The numbers on the curves refer to the values of the decimal logarithms of  $J$ , which where  $J$  is given in units of  $(\text{cm}^2 \text{ s ster MeV})^{-1}$ , is the differential fluxes of protons with  $\alpha_0 \approx 90^\circ$  (near the plane of the geomagnetic equator). Data of satellites are associated by with different symbols. The red line corresponds to the lower boundary of the power-law tail of the proton spectra; while green line corresponds to the maximum energy of protons trapped in the ERB (Ilyin et al., 1984).

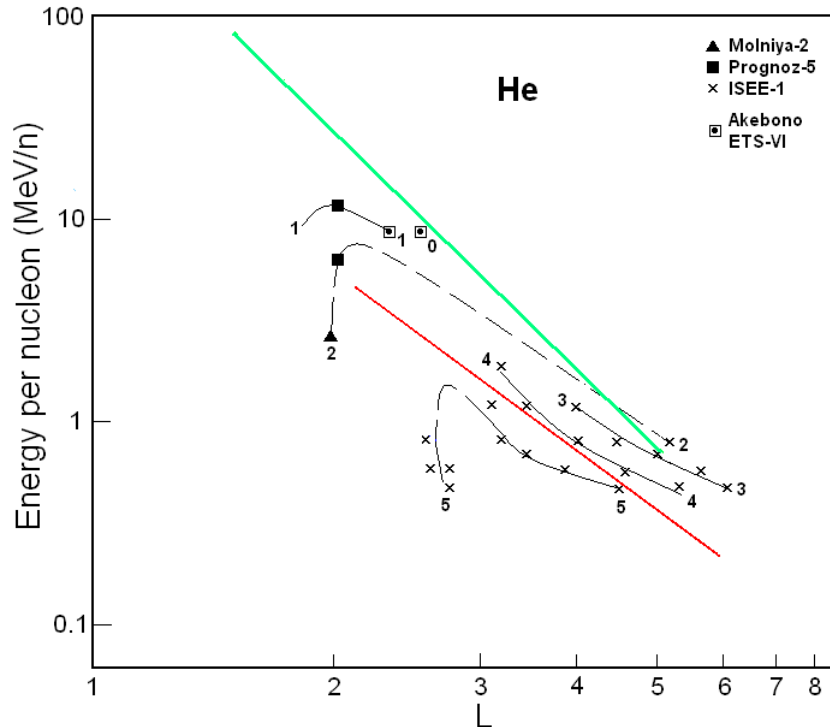

590  
591  
592  
593  
594  
595

**Figure 3.** Helium ion fluxes in the ERB near minima of the solar activity. The numbers on the curves refer to the values of the decimal logarithms of  $J$ , which where  $J$  is given in units of  $(\text{cm}^2 \text{ s ster MeV/n})^{-1}$ , is the differential fluxes of helium ions with  $\alpha_0 \approx 90^\circ$  (near the plane of the geomagnetic equator). Data of satellites are associated by with different symbols. The red line corresponds to the lower boundary of the power-law tail of the helium spectra; while green line corresponds to the maximum energy of these ions trapped in the ERB (Ilyin et al., 1984).

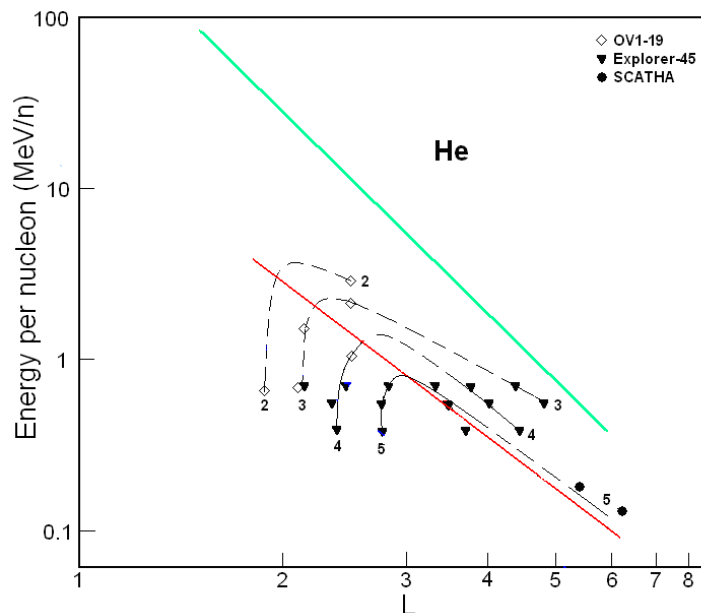

596  
597  
598  
599  
600  
601

**Figure 4.** Helium ion fluxes in the ERB near maxima of the solar activity. The numbers on the curves refer to the value of the decimal logarithms of  $J$  which where  $J$  is given in units of  $(\text{cm}^2 \text{ s ster MeV/n})^{-1}$ , is the differential fluxes of ions with  $\alpha_0 \approx 90^\circ$  (near the plane of the geomagnetic equator). Data of satellites are associated by with different symbols. The red line corresponds to the lower boundary of the power-law tail of the helium spectra; while green line corresponds to the maximum energy of these ions trapped in the ERB (Ilyin et al., 1984).

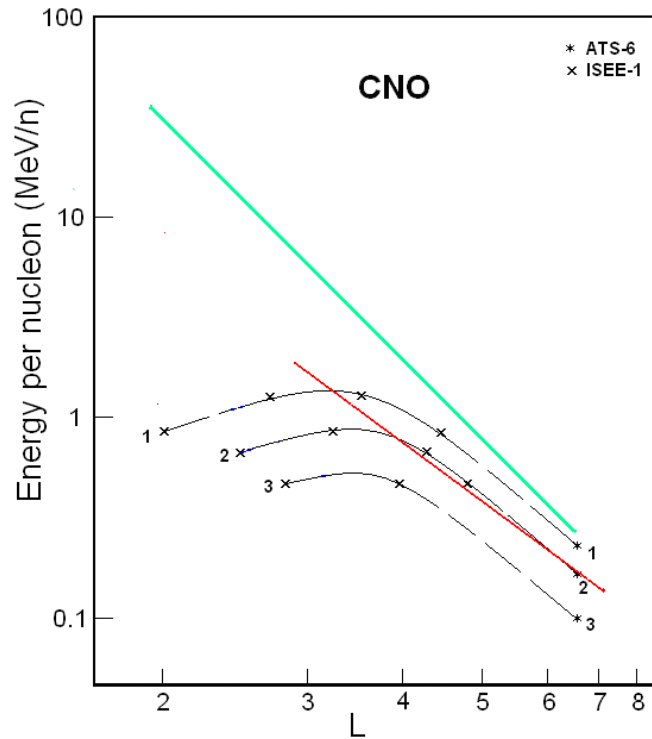

602  
 603 **Figure 5.** CNO ion fluxes in the ERB near minima of the solar activity. The numbers on the curves refer to the values  
 604 of the decimal logarithms of  $J$ , which where  $J$  is given in units of  $(\text{cm}^2 \text{ s ster MeV/n})^{-1}$ , is the differential fluxes of  
 605 ions with  $\alpha_0 \approx 90^\circ$  (near the plane of the geomagnetic equator). Data of satellites are associated by with different  
 606 symbols. The red line corresponds to the lower boundary of the power-law tail of the CNO ion spectra; while green  
 607 line corresponds to the maximum energy of these ions trapped in the ERB (Ilyin et al., 1984).

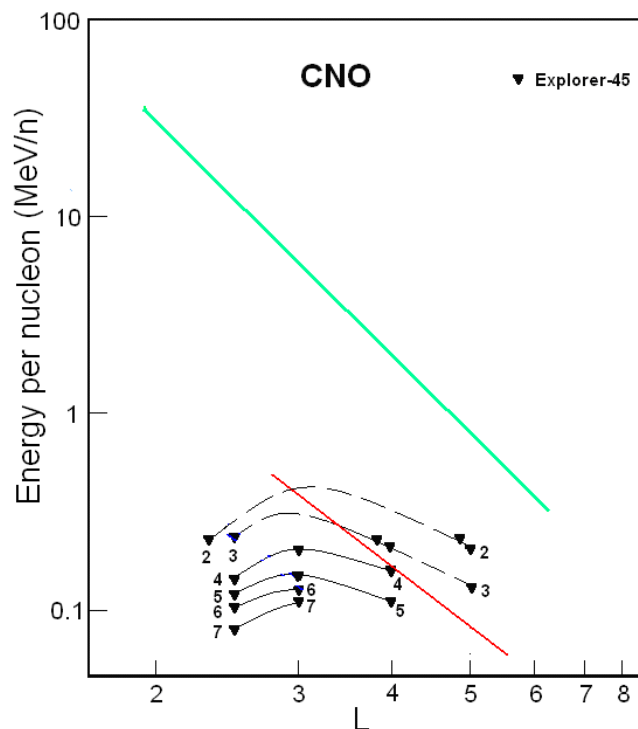

608  
 609 **Figure 6.** CNO ion fluxes in the ERB near the maximum of the solar activity. The numbers on the curves refer to the  
 610 values of the decimal logarithms of  $J$ , which where  $J$  is given in units of  $(\text{cm}^2 \text{ s ster MeV/n})^{-1}$ , is the differential fluxes  
 611 of ions with  $\alpha_0 \approx 90^\circ$  (near the plane of the geomagnetic equator). Data of satellites are associated by with different  
 612 symbols. The red line corresponds to the lower boundary of the power-law tail of the CNO ion spectra; while green  
 613 line corresponds to the maximum energy of these ions trapped in the ERB (Ilyin et al., 1984).
