# Supplementary material for: Earth's radiation belts ions: Patterns of the spatial-energy structure and its solar-cyclic variations
Source: Copernicus journal article supplement (doi:10.5194/angeo-2019-152), 2019-11-07
Supplement: Supplementary file [file angeo-2019-152-AC4-supplement.pdf]

1 **Earth's radiation belts ions: patterns of the spatial-energy structure**  
2 **and its solar-cyclic variations**

3 **Alexander S. Kovtyukh**

4 Skobeltsyn Institute of Nuclear Physics, Moscow State University, Moscow, 119234, Russia;  
5 kovtyukhas@mail.ru

6 **Abstract** Spatial-energy distributions of the stationary fluxes of protons, helium and ions of  
7 carbon-nitrogen-oxygen (CNO) group, with energy from  $E \sim 100$  keV to 200 MeV, in the  
8 Earth's radiation belts (ERB), at  $L \sim 1-8$ , are considered here using data from satellites in the  
9 period 1961–2017. ~~It is find~~ It has been found that the results of these measurements line up in  
10 the space  $\{E, L\}$  following ~~by~~ some regular patterns. The ion ERB shows a single intensity peak  
11 that moves toward Earth with increasing energy and decreasing ion mass. Solar-cyclic (11-year)  
12 variations in the distributions of protons, helium and CNO group ions fluxes in the ERB are  
13 studied. It has been observed that in the inner regions of the ERB, fluxes decrease with  
14 increasing solar activity and that the solar-cyclic variations of fluxes of  $Z \geq 2$  ions are much  
15 greater than for protons; moreover, it seems that they increase with increasing atomic number  $Z$ .  
16 ~~Finally, the possible physical mechanisms leading to formation of this spatial energy structure~~  
17 ~~and to the solar cyclic variations of the ERB ion fluxes are discussed.~~ It is suggested that  
18 heavier ion intensities peak further from the Earth and vary more over the solar cycle because  
19 they have more strong ionization losses. These results indicate also that with variations in the  
20 level of solar activity the coefficient  $D_{LL}$  of the radial diffusion of the ERB ions change much  
21 less than the ionization loss rates of ions with  $Z \geq 2$ .

22  
23  
24 **Keywords.** Magnetospheric physics (energetic particles, trapped). Radiation belts.  
25

## 26 1 Introduction

27 The ERB consist mainly of charged particles with energy from  $E \sim 100$  keV to several hundreds of  
28 megaelectronvolt (MeV). These particles are trapped by the geomagnetic field at altitudes from  $\sim$   
29 200 kilometers to  $\sim 50\text{--}70$  thousands kilometers. The ERB ~~is consisted~~ consists mainly of  
30 electrons and protons, but there are also helium nuclei and other  $Z > 2$  ions (like oxygen etc),  
31 where  $Z$  is the charge of the atomic nucleus with respect to the charge of the proton. During  
32 geomagnetic disturbances, ion fluxes, and their distributions are changed. These fluxes depend  
33 also on the phase of the solar cycle, conditions in the interplanetary space, and other factors.

34 Particles with different energy  $E$  and pitch angles  $\alpha$  ( $\alpha$  is the angle between the local vector of  
35 the magnetic field and the vector of a particle velocity), which are injected into some point of the  
36 geomagnetic trap, drift conserving the adiabatic invariants ( $\mu$ ,  $K$ ,  $\Phi$ ) ~~and populate a narrow layer~~  
37 ~~surrounding around~~ the Earth (Alfvén and Fälthammar, 1963; Northrop, 1963). ~~This layer is~~  
38 ~~called the drift shells~~. Therefore, experimental data on the ERB are often represented in  
39 coordinates  $\{L, B\}$ , where  $L$  is the drift shell parameter and  $B$  is the local induction of the magnetic  
40 field (McIlwain, 1961). For the dipole magnetic field,  $L$  is a distance, in the equatorial plane, from  
41 the given magnetic field line to the center of the dipole itself (in Earth's radii  $R_E$ ).

42 The stationary fluxes  $J$  of the ERB particles with given energy and pitch angle  $\alpha$  decrease  
43 usually when the point of observation is shifted from the equatorial plane to higher latitudes along  
44 a certain magnetic field line (if we exclude the peripheral regions of the geomagnetic trap, where  
45 the drift shells of the captured particles are split and branched). This dependence is described by  
46 the functions  $J(B/B_0)$ , where  $B$  and  $B_0$  are values of the magnetic field at the point of observation  
47 and in the equatorial plane on the same magnetic field line, respectively.

48 Outer and inner regions of the ERB are maintained in dynamic equilibrium with the  
49 environment by different mechanisms (see review Kovtyukh, 2018).

50 The outer belt ( $L > 3.5$ ) is formed mainly by the mechanisms of radial diffusion of ions towards  
51 the Earth under the action of fluctuations of both electric and magnetic fields resonating with their  
52 drift periods (see, e.g., Schulz and Lanzerotti 1974; Kovtyukh, 2016b). This transport is  
53 accompanied by the betatron acceleration and by the ionization losses of the ions as a result of  
54 their interactions with the plasmasphere and with residual atmosphere.

55 The inner belt ( $L < 2.5$ ) of protons with  $E > 10$  MeV is formed mainly as a result of decay of  
56 neutrons knocked from the nuclei of the atmospheric atoms by the Galactic Cosmic Rays (GCR)-  
57 ~~For~~ ; for protons with  $E < 10$  MeV this mechanism (CRAND) is supplemented by the radial  
58 diffusion of particles from the outer to the inner belt (see, e.g., Selesnick et al., 2013, 2014). The  
59 inner belt of ions with  $Z > 4$  is formed mainly from the ions of the Anomalous component of  
60 Cosmic Rays (see, e.g., Mazur et al., 2000).

61 In the intermediate region ( $2.5 < L < 3.5$ ), the mechanism of a ion capture from Solar Cosmic  
62 Rays takes place during strong magnetic storms (see, e.g., Selesnick et al., 2014).

63 Thus, the main mechanisms of formation of the ERB, together with the sources of injection and  
64 losses of ions, are known. However, for a comprehensive verification of the physical models and to  
65 identify the mathematical models and their parameters, the formulation of complete and reliable  
66 empirical representations of the ERB for each of the ion components, is necessary; it is also  
67 necessary for ensuring the safety of space flights.

68 These models can be created only using experimental data, obtained over many years and  
69 decades; such models (see, e.g., Ginet et al., 2013) were already created for protons (AP8/AP9)  
70 and they are widely used in space research. On the contrary, measurements of  $Z \geq 2$  ion fluxes  
71 suffer from technical problems due to small statistics and high background of protons and  
72 electrons. For this reasons, empirical and semi-empirical models for  $Z \geq 2$  ions, are applicable  
73 only to very limited regions of the space  $\{E, L\}$ .

74 One of the main problems of this work is to consider the possibility to create sufficiently  
75 complete and reliable empirical models of the ERB for these ions based on currently available  
76 experimental data.

77 In the following sections, the spatial-energy structure of the ERB in the  $\{E, L\}$  space for  
78 protons, helium and CNO group ions are considered (Sect. 2) together with possible physical  
79 mechanisms of formation of these structures and their solar-cyclic variations (Sect. 3). Finally, the  
80 main conclusions of this work are given (Sect. 4).

## 81 **2 Spatial-energy distributions of the ion fluxes near the equatorial plane**

82 There can be ions trapped in drift shells only with energies less than some maximum values,  
83 determined by the Alfvén's criterion:  $\rho_i(L, E, M_i, Q_i) \ll R_c(L)$ , where  $\rho_i$  is the gyroradius of ions,  
84 and  $R_c$  is the radius of curvature of the magnetic field near the equatorial plane ( $M_i$  and  $Q_i$  are mass  
85 and charge of ions with respect to the corresponding values for protons). According to this  
86 criterion and to the theory of stochastic motion of particles, the geomagnetic trap [in the dipolar  
87 region](#) can capture and durably hold only ions with  $E$  (MeV)  $< 2000 \times (Q_i^2/M_i) L^{-4}$  (Ilyin et al.,  
88 1984). The green line in Figs 1-6 represents this very boundary.

89 When comparing the data of various experiments in the ERB, the question arises about the  
90 compatibility of these results with each other and the reasons for their discrepancies. A significant  
91 number of these discrepancies can be connected to the differences in their trajectories; in the  
92 construction of the instruments and their angular characteristics; in the energy ranges and sets of  
93 energy channels. For the stationary ERB, these discrepancies can also be associated with  
94 differences in the general state of the Sun, heliosphere and magnetosphere of the Earth during  
95 various periods of data-taking. These factors influence the fluxes of ions with  $Z \geq 2$  in the ERB  
96 more significantly with respect to proton fluxes (see, e.g., Kovtyukh, 2018).

97 In this section, experimental data of various satellites, which were obtained for quiet periods  
98 ( $Kp < 2$ ) and near the equatorial plane of the ERB for ions with equatorial pitch angles  $\alpha_0 \approx 90^\circ$   
99 have been used. In the regions of  $E$  and  $L$  shells, where these data were obtained, the ion fluxes ~~do~~  
100 [are](#) not distorted by the background of other particles.

101 In many important experiments, the instruments were not able to separate fluxes of ions by their  
102 charge. Moreover, for the ions of the CNO group, the separation by mass are not usually  
103 performed. For heavier species, for example for Fe ions, we have very small data-sets. Therefore,  
104 this work presents data on helium ions (without any charge separating) and CNO ions (without any  
105 mass or charge separation).

106 To solve the aforementioned problems, it is important to choose the form of representation  
107 (space of variables), in which the results of every experiment can be compared to the others. In our  
108 case, the space  $\{E, L\}$  has been used; this choice is very efficient to better organize fragmentary  
109 experimental data obtained in different ranges of  $E$  and  $L$ .

110 Figures 1–6 show the spatial-energy distributions of the fluxes of protons, helium ions, and ions  
111 of the CNO group near the equatorial plane. Odd figures refer to periods near the minima, and  
112 even figures refer to periods near the solar activity maxima. The values  $E$  and  $L$  in these figures are  
113 presented in logarithmic scales. Statistical and methodical errors of the experimental points on  
114 these figures do not exceed of the size of these points. The markers are connected by lines of equal  
115 intensity of ion fluxes (iso-lines); the decimal logarithms of the fluxes  $J$ , in unit of  $(\text{cm}^2 \text{ s ster}$   
116  $\text{MeV/n})^{-1}$ , are shown near each iso-lines.

117 Such representations of the experimental data are not only visual, but also very convenient and  
118 rather universal. Obviously, Figs. 1–6 actually show both radial profiles of the fluxes of ions for a  
119 given energy and ion energy spectra for a given  $L$  shell.

120 The points in Figs. 1–6 have been obtained from the radial profiles of fluxes  $J(L)$  for the  
121 average energies of the ions in the channels of the instruments. Unlike electron fluxes or ion fluxes

122 measured during geo-active conditions, the ion fluxes considered here (i.e. during quiet periods),  
123 have only one maximum in the functions  $J(L)$ . As a result, for each ~~experiment~~ energy channel of  
124 the respective mission, 1 or 2 points were obtained (on the outer and inner edges of these profiles)  
125 with certain values of  $E$  and  $L$  for a given level of ion fluxes. Sometimes, especially for fluxes,  
126 only one point was obtained: in these cases, the radial profile of the ion fluxes was cutoff at small  
127 values of  $L$  due to a significant background of contaminating particles and no  
128 interpolation/extrapolation has been performed whatsoever.

129 Each iso-line, shown in these figures, has been evaluated separately from the corresponding set  
130 of experimental points (icons); then it was transferred (along with the icons) to the corresponding  
131 figure; thus, in more abundantly populated sectors of the plots (i.e. for protons with  $E > 1$  MeV at  
132  $L > 2$ ) such iso-lines are mixing in Figs. 1–2. In case of a large distance between neighboring  
133 points, the corresponding segments of the iso-lines are shown as dashed arcs.

134 The radial profiles of the differential fluxes  $J(L)$  of particles with different energy tend to  
135 intersect with each other in those regions where the energy spectra present some local maximum or  
136 minimum. On the contrary, the iso-lines cannot intersect with each other: because this would mean  
137 that, at the same point in the space  $\{E, L\}$ , the ion fluxes differ very significantly (by an order of  
138 magnitude) for quiet periods. Such uncertainty does not have a physical sense and a special  
139 analysis is needed to identify other possible sources of errors.

140 Representing plots in a different space of variables would lead to more significant  
141 methodological errors and uncertainties, because of the natural differences in the instrumentation  
142 of the experiments taken into account; thus, a series of approximations or  
143 interpolation/extrapolation techniques would become inevitable.

## 144 2.1 Spatial-energy structure of the proton fluxes

145 There is a large number of experimental data concerning ERB protons; the most important of them  
146 are presented in Figs. 1 and 2. These figures serve as a comparison with similar distributions of  $Z \geq$   
147 2 ions (Figs. 3–6).

148 Figure 1 sums up results from the satellites Relay-1 (Freden et al., 1965); Ohzora or EXIS C:  
149 Exospheric Satellite C, Akebono or EXOS-D: Exospheric Satellite D and ETS-VI: Engineering Test  
150 Satellite (Goka et al., 1999). These results have been collected during minimum periods of various  
151 solar cycles, i.e. between 19<sup>th</sup> / 20<sup>th</sup> (1963), 21<sup>th</sup> / 22<sup>th</sup> (1984–1985), and 22<sup>th</sup> / 23<sup>th</sup> (1994–1996) of  
152 the solar activity cycles.

153 Figure 2 sums up results from the satellites 1968-81A (Stevens et al., 1970), Injun-5 or  
154 Explorer-40 (Krimigis, 1970; Venkatesan and Krimigis, 1971; Pizzella and Randall, 1971), 1969-  
155 025C or OV1-19: Orbiting Vehicle 1-19 (Croley et al., 1976), Azur or GRS A: German Research  
156 Satellite A (Hovestadt et al., 1972; Westphalen and Spjeldvik, 1982), Molniya-1 (Panasyuk and  
157 Sosnovets, 1973), GEOS-2: Geodetic Earth Orbiting Satellite 2 (Wilken et al., 1986), CRRES: The  
158 Combined Release and Radiation Effects Satellite (Albert et al., 1998; Vacaresse et al., 1999), GEO-  
159 3: Geostationary Orbit 3 (Selesnick et al., 2010) and Van Allen Probes (Selesnick et al., 2014,  
160 2018). These results were obtained during maximum periods of 20<sup>th</sup> (1968–1971), 22<sup>th</sup> (1990–  
161 1991), 23<sup>th</sup> (2000), and 24<sup>th</sup> (2012–2017) solar cycles.

162 The data of the satellites Explorer-45 (Fritz and Spjeldvik, 1979, 1981) and ISEE-1:  
163 International Sun-Earth Explorer 1 or Explorer-56 (Williams, 1981; Williams and Frank, 1984) are  
164 given in both Figs. 1 and 2 because solar-cyclic variations of the ERB proton fluxes are negligible  
165 at  $L > 2.5$  (see, e.g., Vacaresse et al., 1999).

166 From a comparison of Figs. 1 and 2, one can see that at  $L < 2.5$  (especially at  $L < 1.4$ ) the proton  
167 fluxes during solar minima (Fig. 1) are higher than during maxima (Fig. 2). In addition, in the  
168 former the inner edge of the proton belt is less steep and it can reach smaller  $L$  shells (for  $E > 1$   
169 MeV). The distributions of protons in the space  $\{\mu, L\}$  (see, e.g., Kovtyukh,(2016a,b) , which I  
170 have been constructed from Figs. 1 and 2 confirm these conclusions.

171 In Figs. 1 and 2, the iso-lines of proton fluxes are almost parallel to each other on  $L > 3$  at  
 172 sufficiently high energies. Since these iso-lines have separated from each other by approximately  
 173 equal intervals on a logarithmic scale of the energy, this region in the space  $\{E, L\}$  corresponds to  
 174 power-law spectra of the ERB protons: for power-law spectra,  $J \propto E^{-\gamma}$ , where the index  $\gamma = -$   
 175  $\Delta(\log J)/\Delta(\log E)$ . In these figures, this region is located between the green and red lines.

176 The red line corresponds to the lower boundary ( $E_b$ ) of the power-law tail of the proton spectra.  
 177 For this line,  $E_b \sim 36 \times L^{-3}$  MeV. Some changes in the slope of these iso-lines at  $L > 6$  can be  
 178 connected to a discrepancy between the real configuration of the magnetic field lines and the  
 179 dipolar configuration (used here for  $L$  shells calculation and for the red line).

180 For the dipole magnetic field region, the points on the red line correspond to particles with a  
 181 specific value of the 1<sup>st</sup> adiabatic invariant of motion ( $\mu_b$ ). For Figs. 1 and 2, the average value  $\mu_b$   
 182 is  $\sim 1.16$  keV nT<sup>-1</sup>. Segments of an iso-lines, that are parallel to the red line, also correspond to  
 183 certain values of the invariant  $\mu$ . In this region of the space  $\{E, L\}$  the ionization and other losses  
 184 of the ERB protons during radial drift can be neglected, and changes of fluxes with changing  $L$  are  
 185 practically reduced to adiabatic transformations in a magnetic field.

186 It results from these figures that at  $L = 3-6$ , the value  $\gamma = 4.8 \pm 0.5$ . At  $L > 6$  the distances  
 187 between these iso-lines increase with  $L$ , and the value  $\gamma$  is decreased from  $\sim 4.7-5.0$  at  $L = 6$  to  $\sim$   
 188  $4.1-4.5$  at  $L = 8$ . This is due to the deviation of the magnetic field from the dipole configuration as  
 189 well as to the increasing variability of this field with increasing  $L$ .

190 According to the data of satellites considered in (Kovtyukh, 2001), invariant parameters  $\mu_b$  and  $\gamma$   
 191 were found only at  $L > 3$ . In this work, a wider range of  $L$  and  $E$  is considered, and for protons with  
 192  $E > 10$  MeV these parameters can be traced to  $L \sim 2$ . At  $L = 2$ ,  $\gamma = 4.4 \pm 0.6$  (Fig. 1) and  $\gamma = 4.7 \pm 1.3$   
 193 (Fig. 2). This is due to the fact that the energy range is significantly extended toward higher values  
 194 (up to 200 MeV), but here the ionization losses for protons rapidly decrease (see, e.g., Schulz and  
 195 Lanzerotti, 1974; Kovtyukh, 2016a).

## 196 2.2 Spatial-energy structure of the helium ion fluxes

197 In Figs. 3 and 4 helium ion fluxes, averaged for quiet periods (Kp < 2), are presented.

198 Figure 3 sums up results from the satellites Molnija-2 (Panasyuk et al., 1977), Prognoz-5  
 199 (Lutsenko and Nikolaeva, 1978), ISEE-1: The International Sun-Earth Explorer 1 (Hovestadt et al.,  
 200 1981); Akebono or EXOS-D: Exospheric Satellite D and ETS-VI: Engineering Test Satellite (Goka et  
 201 al., 1999). These results have been collected during minimum periods of various solar cycles, i.e.  
 202 between 20<sup>th</sup> / 21<sup>th</sup> (1975–1977), 21<sup>th</sup> / 22<sup>th</sup> (1984–1985), and 22<sup>th</sup> / 23<sup>th</sup> (1994–1996) of the solar  
 203 activity cycles.

204 Figure 4 sums up results from the satellites OV1-19: Orbiting Vehicle 1-19 (Blake et al., 1973;  
 205 Fennell and Blake, 1976), Explorer-45 (Fritz and Spjeldvik, 1978, 1979; Spjeldvik and Fritz,  
 206 1981), SCATHA: Spacecraft Charging At High Altitudes (Blake and Fennell, 1981; Chenette et al.,  
 207 1984). These results were obtained during maximum periods of 20<sup>th</sup> (1968–1971) and 21<sup>th</sup> (1979)  
 208 solar cycles.

209 From a comparison of Figs. 1–2 with Figs. 3–4, one can see that at  $L > 2$  for helium ions the  
 210 solar-cyclic (11-year) variations are greater than for protons. For example, at  $L \sim 2-3$  from  
 211 maximum to minimum of solar activity fluxes of protons with  $E > 1$  MeV practically do not  
 212 change, and the fluxes of helium ions with  $E > 1$  MeV/n are increased by one order of magnitude.

213 Figures 3 and 4 show the same patterns as for protons, but the distribution of helium ion fluxes  
 214 is slightly shifted towards higher values of  $L$  shell (with respect to protons). Unlike protons, there  
 215 are significant “white spots” in these figures: because there are no experimental data for helium  
 216 ions in these regions.

217 The red line on these figures corresponds to the lower boundary of the power-law tail of the  
 218 helium ions spectra. For this line,  $E_b/M_i \sim 43.4 \times L^{-3}$  MeV/n (Fig. 3) and  $E_b/M_i \sim 21.7 \times L^{-3}$  MeV/n

219 (Fig. 4). If one takes into account that at  $L < 6$  for helium ions with  $E > 0.2$  MeV/n the average  
 220 charge  $Q_i = +2$  (see, e.g, Spjeldvik, 1979), then for the considered boundary we get:  $\mu_b \sim 1.4 \times Q_i$   
 221 keV/n $\times$ nT $^{-1}$  at the maximum of solar activity and  $\mu_b \sim 1.4 \times M_i$  keV/n $\times$ nT $^{-1}$  at the minimum of solar  
 222 activity (for the dipole magnetic field region). The iso-lines of helium ion fluxes in Figs. 3 and 4,  
 223 which pass above the red line at  $L > 2.5$ , correspond to an average value of  $\gamma \sim 5.5$  (there is a large  
 224 uncertainty due to the small covered energy range).

225 For helium spectra, as for protons ones, the values of the parameters of the power-law tail are in  
 226 good agreement with what has been found in (Kovtyukh, 2001).

227 At the same time, one can see that the iso-lines of the fluxes of helium ions in the region above  
 228 the red line (i.e. in the region of power-law spectra) substantially deviate from the slope of the red  
 229 line. At  $L > 3$  the fluxes of helium ions with given energy are increase with decreasing  $L$  slower  
 230 than it is for protons expected from adiabatic transformation. This means that the ionization losses  
 231 of the ERB helium ions significantly exceed these losses for protons, in agreement to well-known  
 232 calculations (see, e.g., Schulz and Lanzerotti, 1974). For example, Coulomb loss rate increases  
 233 with increasing  $Z$  of the ions as  $Z^2$ .

### 234 2.3 Spatial-energy structure of the CNO group ions fluxes

235 In Figs. 5 and 6 CNO group ions fluxes, averaged for quiet periods ( $K_p < 2$ ), are presented.

236 Figure 5 sums up results from the satellites ATS-6: Applications Technology Satellite 6  
 237 (Spjeldvik and Fritz, 1978; Fritz and Spjeldvik, 1981) and ISEE-1: The International Sun-Earth  
 238 Explorer 1 (Hovestadt et al., 1978). These results have been collected during minimum period  
 239 between 20<sup>th</sup> / 21<sup>th</sup> of the solar activity cycles (1974–1975, 1977).

240 Figure 6 sums up results from the satellite Explorer-45 (Spjeldvik and Fritz, 1978; Fritz and  
 241 Spjeldvik, 1981). These results were obtained during maximum period of activity in 20<sup>th</sup> solar  
 242 cycle (1971–1972).

243 On Figs. 5–6 the spatial-energy patterns of the ion fluxes of the CNO group are even more  
 244 shifted towards higher values of  $L$  shell and its configuration differ significantly from Figs. 1–4.

245 From a comparison of Figs. 1–2 with Figs. 5–6 one can see that, for ions of CNO group, the  
 246 solar-cyclic (11-year) variations are greater than for protons. For example, at  $L \sim 3$ –5 from  
 247 maximum to minimum of solar activity fluxes of protons with  $E > 1$  MeV practically do not  
 248 changed, but the fluxes of the CNO group increase by one order of magnitude or more. From a  
 249 comparison of Figs. 3–4 with Figs. 5–6 it is seen also that the fluxes of CNO group change several  
 250 times more than the fluxes of helium ions do.

251 This means that, for ions of the CNO group, the ionization losses at  $L = 3$ –5 are much larger  
 252 than for ions with  $Z \leq 2$  and these losses have a significant effect even on the power-law segment  
 253 of the spectra of the CNO ions (in the part which is seen on Figs. 5–6). Therefore, the lower  
 254 boundary of the power-law tail of these ions spectra have not been obtained by the experiments  
 255 collected in Figs. 5 and 6. The red line on these figures corresponds to adiabatic laws (see  
 256 Kovtyukh, 2001); this line let us estimate the deviations from these laws. As can be seen from Fig.  
 257 5–6, ionization losses for ions of the CNO group are especially large at the peak of solar activity  
 258 (Fig. 6): during these times, the slope of iso-lines on  $L > 3$  is significantly less than the slope of the  
 259 red line.

260 At the same time, at  $L > 4$  in Fig. 5 and at  $L > 3$  in Fig. 6, the iso-lines of fluxes pass almost  
 261 parallel to each other and at approximately equal distances from each other; the average value of  $\gamma$   
 262 corresponding to them is  $\sim 6$  (there is a large uncertainty due to the small covered energy range).  
 263 Thus, for sufficiently large values of  $E$  and  $L$ , the CNO group ions spectra in the ERB have a  
 264 power-law form, but these spectra are softer in comparison with the spectra of protons.

265 The red line corresponds here to the dependences  $E_b/M_i \approx 43.4 \times L^{-3}$  MeV/n (on Fig. 5) and  $E_b/M_i$   
 266  $\sim 12.4 \times L^{-3}$  MeV/n (on Fig. 6), which are taken from (Kovtyukh, 2001) where this boundary was

267 more clearly defined also for the ions of the CNO group. If one takes into account that at  $L \sim 3-5$   
268 for the CNO group ions with  $E > 0.1$  MeV/n the average charge  $Q_i = +4$  (see, e.g., Spjeldvik and  
269 Fritz, 1978), then for this boundary one can get:  $\mu_b \sim 1.4 \times Q_i$  keV/n $\times$ nT $^{-1}$  at the maximum of solar  
270 activity and  $\mu_b \sim 1.4 \times M_i$  keV/n $\times$ nT $^{-1}$  at the minimum of solar activity (for the dipole magnetic field  
271 region).

### 272 3 Discussion

273 Let us consider the conclusions following the results obtained here for solar-cyclic variations in the  
274 fluxes of ERB ions. Solar-cyclic (11-year) variations of proton fluxes with  $E > 1$  MeV in the inner  
275 region of the ERB have been studied in many works (see, e.g., Pizzella et al., 1962; Hess, 1962;  
276 Blanchard and Hess, 1964; Filz, 1967; Nakano and Heckman, 1968; Vernov, 1969; Dragt, 1971;  
277 Huston et al., 1996; Vacaressse et al., 1999; Kuznetsov et al., 2010; Qin et al., 2014). These  
278 variations reach one order of magnitude at  $L = 1.14$  and are reduced rapidly with increasing  $L$  (see,  
279 e.g., Vacaressse et al., 1999). ~~However, solar-cyclic variations of fluxes of ions with  $Z \geq 2$  have not  
280 been considered in these works.~~

281 In these works, such variations of the proton fluxes of the inner belt are connected to the solar-  
282 cyclic variations of the energy loss rates of protons in this region. ~~However, solar-cyclic variations  
283 of fluxes of ions with  $Z \geq 2$  have not been considered in these works.~~ For protons with  $E > 10$  MeV  
284 of the inner ERB, the effect of attenuation of GCR proton fluxes in the Earth's orbit with  
285 increasing solar activity acts in the same direction (see, e.g., Usoskin et al., 2005; Selesnick et al.,  
286 2007). We must also take into account a secular variations of the geomagnetic dipole moment (see,  
287 e.g., Selesnick et al., 2007).

288 Consider in more detail the solar-cyclic variations of the ERB ions fluxes in connect to  
289 variations of the energy loss rates of these ions. In quiet periods, only the mechanism of ionization  
290 loss is significant for the ERB protons trapped in small  $L$  shells (see, e.g., Schulz and Lanzerotti,  
291 1974). Energy loss rates and lifetimes of the ERB protons are determined, in this mechanism, by  
292 the density of atmospheric atoms and ionospheric plasma ( $N$ ) in a geomagnetic trap. This density  
293 depends on the intensity of the ultraviolet radiation of the Sun. With decreasing solar activity (with  
294 a transition from maximum to minimum of the solar cycle), the densities of atmospheric atoms and  
295 ionospheric plasma in a geomagnetic trap are decreased. ~~If the proton supply rates to the inner belt,  
296 under the action of the CRAND mechanism, remain unchanged or the effect of these changes is  
297 weaker than the effect connected with changes of loss rates of the protons, and~~ the stationary  
298 proton fluxes will increase with decreasing solar activity.

299 The lifetimes of protons increase with  $L$ ; this leads to a decrease in the amplitude of the solar-  
300 cyclic variations of proton fluxes. A proton lifetime on a given  $L$  shell depends on its energy and is  
301 less than 11 years ( $\sim 3.5 \times 10^8$  s) at  $L < L_c(E)$ . For example, for protons with  $E > 6$  MeV the value  $L_c$   
302 is  $\sim 2.5$  and corresponds to protons with  $\mu > 3$  keV nT $^{-1}$  (see, e.g., Kovtyukh, 2016b, Fig. 3). Figs.  
303 1 and 2 show that for protons the solar-cyclic variations of fluxes are small and localized at  $L < 2.5$   
304 (mainly at  $L < 1.4$ ).

305 In contrast to protons, Figs. 3–6 show significant solar-cyclic variations of fluxes of helium ions  
306 and CNO group ions at  $L \sim 2-5$ . ~~There is low density of atmospheric atoms and ionospheric  
307 plasma in that region (compared to  $L < 2$ ), but the density is changes consistently with solar  
308 cycle. These variations can be explained by the same mechanism that has been suggested for  
309 protons at  $L < 2.5$ .~~

310 For ions with  $Z \geq 2$  in the ERB, ionization losses are more significant than for protons and this  
311 can be connected to the absence of ions with  $Z \geq 2$  at  $L < 2$  (or very low values of these fluxes)  
312 during quiet geomagnetic conditions. Such short lifetimes are manifested also in the slope of the  
313 experimental curves in Fig. 4 and 6 (this was noted in sections 2.2 and 2.3, respectively).

314 Consequently, for ions with  $Z \geq 2$ , the regions in which variations can manifested, should be  
315 located on higher  $L$  shells (at the same energies as for protons).

316 The lifetimes of ions in the energy ranges considered here are  $\tau \propto M_i^{-1/2} Q_i^{-2} N^{-1} E^{3/2}$  (Schulz and  
317 Lanzerotti, 1974). In a first approximation, for  $N \propto L^{-4}$ , we obtain the value  $L_{ci} \sim M_i^{1/8} Q_i^{1/2} L_c$ , where  
318  $L_c$  corresponds to the  $L$  shell of protons of the same energy of the other ions under study. For helium  
319 ions ( $M_i = 4$ ,  $Q_i = 2$ ) with  $E \sim 6$  MeV, we obtain **outer boundary**  $L_{ci} \sim 4.2$ . For ions of CNO group ( $M_i$   
320  $= 14$ ,  $Q_i = 4$ ) with  $E \sim 6$  MeV we obtain **outer boundary**  $L_{ci} \sim 6.9$ . These are very rough estimations,  
321 but they are in agreement with the results presented in Figs. 3–6.

322 These estimates are based on the following assumption: during variations in solar activity, the rates  
323 of ion supply on  $L < L_{ci}$  remains unchanged (or these changes are weaker than the effect of changes of  
324 the rate of ion losses). ~~This assumption is real for protons with  $E > 10-20$  MeV at  $L < 2.2$ ; in fact,~~  
325 ~~these protons form mainly under the action of the CRAND mechanism. However, at  $L > 2.2$  the~~ The  
326 stationary ion fluxes of the ERB at  $L > 2.5$  form mainly under the action of radial diffusion (see, e.g.,  
327 Schulz and Lanzerotti, 1974; Kovtyukh, 2016b, 2018). Therefore, the solar-cyclic variations of  $Z \geq 2$   
328 ion fluxes can be motivated only under the assumption that the effect related with an increase in the  
329 ionization losses of such ions significantly exceeds the effect connected with the possible enhance of  
330 radial diffusion of ions during the rising phase of solar activity. **For example, when compare the**  
331 **empirical model of the inner belt ( $L < 2.4$ ) of protons with  $E \sim 19-200$  MeV, constructed on the data**  
332 **of Van Allen Probes satellites, with the mathematical model of radial diffusion of protons in this**  
333 **region, it was assumed that on the phase of growth of solar activity from 2013 to 2015,  $D_{LL}$  increases**  
334 **by  $\sim 2$  times (Selesnick and Albert, 2019).**

335 In the experimental results presented here for the ERB ions, the region of the power-law tail of  
336 the ion spectra is distinguished. For many experiments, especially for heavy ions, the values of the  
337 parameter of a power-law tail spectra are determined much more accurately by the dependences  
338  $J(L)$  of the ion fluxes (in logarithmic scale) for different pairs of energy channels (see Kovtyukh,  
339 2001). For example, the range of  $L$ , in which these dependences for two energy channels are  
340 parallel to each other is connected to the power-law tail of the spectra. Instead, on smaller values  
341 of  $L$ , these fluxes begin to converge and the radial dependences of these fluxes intersect with each  
342 other, which is related to the maximum in the spectra.

343 The main source of ions in the outer regions of the ERB is the solar wind, and usually the high-  
344 energy part of these spectra have an exponential shape (see, e.g., Ipavich et al., 1981a, 1981b).  
345 Immediately before being captured into the magnetosphere, these ions pass through a highly  
346 turbulized regions, but the high-energy part of their spectra usually retains an exponential shape.  
347 Therefore, the question arises: what physical mechanism converts the form of ion spectra from  
348 exponential to power-law?

349 Evidently, the power-law tail of the ERB ions spectra must be generated-in the outer regions of  
350 the magnetosphere. The most likely region for this to happen is the plasma sheet (PS) of the  
351 magnetospheric tail, which is adjacent to the geomagnetic trap. The high-energy part of the ion  
352 spectra in the PS, at  $R \sim 20-40 R_E$ , has a power-law shape and the exponents of these spectra are  
353 close to the corresponding parameters of the spectra of ions in the ERB. On the data of the  
354 satellites IMP-7 and IMP-8 (Sarris et al., 1981; Lui et al., 1981) and also satellite ISEE-1 (Christon  
355 et al., 1991), the shape of the ion spectra of the PS usually do not change during substorms; they  
356 produce only parallel shifts of the spectra along logarithmic axes  $E$  and  $J$ . These results point out  
357 that the time scales of formation processes of these ion spectra in the PS exceed the times of  
358 substorms.

359 Parameters of the power-law tail of the ion spectra of the outer belt ( $\gamma$  and  $\mu_b$ ) reflect,  
360 apparently, the most fundamental features of the mechanisms of acceleration of ions in the tail of  
361 the magnetosphere. One can try to connect the values of these parameters with the most general  
362 representations of the mechanisms of ion acceleration in the PS of the magnetospheric tail.



363 Most likely, this part of the ion energy spectra is formed in the PS by stochastic mechanisms of  
364 ion acceleration; this hypothesis is supported by many experimental results. The statistical aspect  
365 of these mechanisms reveals itself, in particular, in the fact that the ratios of fluxes (and partial  
366 densities) of ions with different  $Z$  can differ, even greatly, at low and high energies. During their  
367 wander in the phase space, ions gradually lose information about their origin and, therefore, the  
368 high-energy tails of their spectra contain ambiguous information on the partial densities of  
369 different components of ions in the source (see, e.g., Kovtyukh, 2001).

370 The high-energy part of the ion spectra of the PS can be generated by the mechanisms of  
371 acceleration of particles on magnetic irregularities moving with respect to each other (Fermi  
372 mechanism). The fractal structures of the PS are revealed on scales from  $\sim 0.4$  to  $\sim 8$  thousands  
373 kilometers, for example, in the data of the satellite Geotail (Milovanov et al., 1996). ~~If the mass of  
374 the ions are small compared to the mass of the magnetic irregularities in the PS, the average values  
375 of the index  $\gamma$  of the power-law tail should not depend on mass and charge of such nuclei.~~

376 Under equilibrium conditions, this parameter is determined by the average part of energetic ions  
377 in the total energy density of particles and magnetic irregularities ( $\bar{\beta}$ ). From the theory which was  
378 developed by Ginzburg and Syrovatskii (1964), it follows:  $\gamma - 1 \approx (1 - \bar{\beta})^{-1}$ . With increasing  $\bar{\beta}$  in  
379 the interval  $0 < \bar{\beta} < 1$ , the value  $\gamma$  increases monotonically and  $\gamma \rightarrow \infty$  for  $\bar{\beta} \rightarrow 1$ . For real  
380 average values  $\bar{\beta}$  in the central PS  $\bar{\beta} = 0.6-0.7$  (see, e.g., Baumjohann, 1993, Fig. 1), we get  $\gamma =$   
381 ~~3.5-4.3~~  $\sim 3.5-7.0$  ( $\gamma \sim 4.3$  at  $\bar{\beta} \sim 0.7$ ).

382 Spectra with power-law tail and quasi-exponential segment at lower energies can be generated  
383 when the value  $\Delta B / \bar{B}$  for magnetic irregularities is proportional to their size  $\delta r$  and their spectral  
384 density decreases rapidly with increasing  $\delta r$  for  $\delta r < r_s$  ( $r_s$  is a thickness of the central PS), but for  
385  $\delta r > r_s$  it remains almost unchanged. Apparently, the spectra of magnetic irregularities in the PS  
386 with thickness  $r_s$  have just such form (see, e.g., Milovanov et al., 1996). Then, the lower boundary  
387  $\mu_b$  of the power-law tail corresponds to the condition  $r_s / \rho_i \sim 10$ , where  $\rho_i$  is the gyroradius of ions  
388 (see, e.g., Alfvén and Fälthammar, 1963), i.e.  $\mu_b \sim 0.02(Q_i^2/M_i)B_s r_s^2$  keV nT $^{-1}$ , where  $B_s$  is the  
389 average magnetic field induction in the PS (in nT) and  $r_s$  is normalized to the Earth's radius. Using  
390  $B_s \sim 30$  nT and  $r_s \sim 1.3 R_E$  (see, e.g., Baumjohann, 1993) it can be obtained:  $\mu_b \sim 1.0(Q_i^2/M_i)$  keV  
391 nT $^{-1}$ . This value is similar to the lower boundary of the power law spectrum which we find for the  
392 ERB protons, suggesting that not only the slope of the spectrum but also its validity range can be  
393 explained with scattering at magnetic irregularities.

394 The energy spectra of ions in the radiation belts of such planets as Jupiter and Saturn have the  
395 form analogous to that of ion spectra in the ERB (see, e.g., Krimigis et al., 1981; Cheng et al.,  
396 1985; Kollmann et al., 2011). As that in the ERB, these spectra have a long power-law tail, which  
397 is formed, apparently, by mechanisms of stochastic acceleration of ions as a result of their  
398 interactions with the current layer of the magnetospheric tail.

## 399 4 Conclusions

400 In this work, the experimental results for the stationary fluxes of the main ion components of the  
401 ERB (protons, helium ions and ions of the CNO group) in the near equatorial plane, have been  
402 analyzed. It has been found that in the outer belt these fluxes line up in the certain regular  
403 patterns in the space  $\{E, L\}$ . The degree of such similarity increases with increasing  $E$  and  $L$  and it  
404 is linked to the nature of the main sources and on the universality mechanisms of transfer,  
405 acceleration and losses of ERB ions in the outer belt (radial diffusion which conserves  $\mu$  and  $K$  of  
406 ions, betatron acceleration and ionization losses).

407 Moreover, solar-cyclic (11-year) variations of the spatial-energy distributions of the ERB ion  
408 fluxes have been investigated. It has been noted that the ERB ions fluxes are weaker with  
409 increasing solar activity and this effect increases with increasing atomic number  $Z$ . This kind of

410 dependence of the amplitude of flux changes on  $Z$  is typical, also, for faster variations in the fluxes  
411 of the ERB ions, during geomagnetic storms and other disturbances of the Earth's magnetosphere,  
412 as has been underlined in the review Kovtyukh (2018).

413 The figures presented here make it possible to determine in which regions of the space  $\{E, L\}$   
414 near the equatorial plane the ionization losses of ions during their radial diffusion can be neglected  
415 and where this cannot. These results indicate also that with variations in the level of solar activity  
416 the coefficient  $D_{LL}$  of the radial diffusion of the ERB ions change much less than the ionization  
417 losses rates of ions with  $Z \geq 2$ .

418 In addition, the figures given here reveal the localization of “white spots”, especially extensive for  
419 ions with  $Z \geq 2$  and  $E > 1$  MeV/n at  $L < 3$ . As  $Z$  and energy become larger and  $L$  becomes smaller,  
420 the uncertainties in the values of the ERB fluxes become larger. These gaps must be filled by the  
421 results of future experiments on satellites; for now, the extensive gaps in  $Z \geq 2$  ion data do not allow  
422 to create sufficiently complete and reliable empirical models of the ERB for these ions.

423

424 **Acknowledgements.** The author would like to thank the reviewers, Anonymous Referee #1  
425 and Peter Kollmann (Applied Physics Laboratory, Johns Hopkins University), for very important  
426 and fruitful comments and proposals to the paper.

427 **Financial support.** This work was supported by Russian Foundation for Basic Research RFFI  
428 grant No. 17-29-01022.

## 429 References

- 430 Alfvén, H., and Fälthammar, C.-G.: *Cosmical Electrodynamics, Fundamental Principles*,  
431 Clarendon Press, Oxford, 1963.
- 432 Albert, J. M., Ginet, G. P., and Gussenhoven, M. S.: CRRES observations of radiation belt protons,  
433 1, Data overview and steady state radial diffusion, *J. Geophys. Res.*, **103**(A5), 9261–9273.  
434 <https://doi.org/10.1029/97JA02869>, 1998.
- 435 Baumjohann, W.: *The near-Earth plasma sheet: An AMPTE/IRM perspective*, *Space Sci. Rev.*,  
436 **64**(1–2), 141–163, <https://doi.org/10.1007/BF00819660>, 1993.
- 437 Blake, J. B., and Fennell, J. F.: Heavy ion measurements in the synchronous altitude region, *Planet.*  
438 *Space Sci.*, **29**(11), 1205–1213, [https://doi.org/10.1016/0032.0633\(81\)90125-2](https://doi.org/10.1016/0032.0633(81)90125-2), 1981.
- 439 Blake, J. B., Fennell, J. F., Schulz, M., and Paulikas, G. A.: Geomagnetically trapped alpha  
440 particles, 2, The inner zone, *J. Geophys. Res.*, **78**(25), 5498–5506,  
441 <https://doi.org/10.1029/JA078i025p05498>, 1973.
- 442 Blanchard, R. C., and Hess, W. N.: Solar cycle changes in inner-zone protons, *J. Geophys. Res.*,  
443 **69**(19), 3927–3938, <https://doi.org/10.1029/JZ069i019p03927>, 1964.
- 444 Chenette, D. L., Blake, J. B., and Fennell, J. F.: The charge state composition of 0.4–MeV helium  
445 ions in the Earth's outer radiation belts during quiet times, *J. Geophys. Res.*, **89**(A9), 7551–  
446 7555, <https://doi.org/10.1029/JA089iA09p07551>, 1984.
- 447 Cheng, A. F., Krimigis, S. M., and Armstrong, T. P.: Near equality of ion phase space densities at  
448 Earth, Jupiter, and Saturn, *J. Geophys. Res.*, **90**(A9), 526–530,  
449 <http://doi.org/10.1029/JA090iA01p00526>, 1985.
- 450 Christon, S. P., Williams, D. J., Mitchell, D. G., Huang, C. Y., and Frank, L. A.: Spectral  
451 characteristics of plasma sheet ion and electron populations during disturbed geomagnetic  
452 conditions, *J. Geophys. Res.*, **96**(A1), 1–22, <https://doi.org/10.1029/90JA01633>, 1991.
- 453 Croley, D. R., Jr., Schulz, M., and Blake, J. B.: Radial diffusion of inner-zone protons:  
454 Observations and variational analysis, *J. Geophys. Res.*, **81**(4), 585–594,  
455 <https://doi.org/10.1029/JA081i004p00585>, 1976.
- 456 Dragt, A. J.: Solar cycle modulation of the radiation belt proton flux, *J. Geophys. Res.*, **76**(10),  
457 2313–2344, <https://doi.org/10.1029/JA076i010p02313>, 1971.

458 Fennell, J. F., and Blake, J. B.: Geomagnetically trapped  $\alpha$ -particles, *Magnetospheric Particles and*  
459 *Fields*, edited by: McCormac, B. M., D. Reidel, Dordrecht, Holland, 149–156, 1976.

460 Filz, R. C.: Comparison of the low-altitude inner-zone 55–MeV trapped proton fluxes measured in  
461 1965 and 1961–1962, *J. Geophys. Res.*, **72**(3), 959–963,  
462 <https://doi.org/10.1029/JZ072i003p00959>, 1967.

463 Freden, S. C., Blake, J. B., and Paulikas, G. A.: Spatial variation of the inner zone trapped proton  
464 spectrum, *J. Geophys. Res.*, **70**(13), 3113–3116, <https://doi.org/10.1029/JZ070i013p03113>,  
465 1965.

466 Fritz, T. A., and Spjeldvik, W. N.: Observations of energetic radiation belt helium ions at the  
467 geomagnetic equator during quiet conditions, *J. Geophys. Res.*, **83**(A6), 2579–2583,  
468 <https://doi.org/10.1029/JA083iA06p02579>, 1978.

469 Fritz, T. A., and Spjeldvik, W. N.: Simultaneous quiet time observations of energetic radiation belt  
470 protons and helium ions: The equatorial  $\alpha/p$  ratio near 1 MeV, *J. Geophys. Res.*, **84**(A6),  
471 2608–2618, <https://doi.org/10.1029/JA084iA06p02608>, 1979.

472 Fritz, T. A., and Spjeldvik, W. N.: Steady-state observations of geomagnetically trapped energetic  
473 heavy ions and their implications for theory, *Planet. Space Sci.*, **29**(11), 1169–1193,  
474 [https://doi.org/10.1016/0032-0633\(81\)90123-9](https://doi.org/10.1016/0032-0633(81)90123-9), 1981.

475 Ginzburg, V. L., and Syrovatskii, S. I.: *The Origin of Cosmic Rays*, Pergamon Press, Oxford,  
476 1964.

477 Ginet, G. P., O'Brien, T. P., Huston, S. L., Johnston, W. R., Guild, T. B., Friedel, R., Lindstrom,  
478 C. D., Roth, C. J., Whelan, P., Quinn, R. A., Madden, D., Morley, S., and Su, Yi-J.: AE9, AP9  
479 and SPM: New models for specifying the trapped energetic particle and space plasma  
480 environment, *Space Sci. Rev.*, **179**(1–4), 579–615, <https://doi.org/10.1007/s11214-013-9964-y>,  
481 2013.

482 Goka, T., Matsumoto, H., and Takagi, S.: Empirical model based on the measurements of the  
483 Japanese spacecrafts, *Radiation Measurements*, **30**(5), 617–624, [https://doi.org/10.1016/S1350-4487\(99\)00237-1](https://doi.org/10.1016/S1350-4487(99)00237-1), 1999.

485 Hess, W. N.: Discussion of paper by Pizzella, McIlwain, and Van Allen, 'Time variations of  
486 intensity in the Earth's inner radiation zone, October 1959 through December 1960', *J.*  
487 *Geophys. Res.*, **67**(12), 4886–4887, <https://doi.org/10.1029/JZ067i012p04886>, 1962.

488 Hovestadt, D., Häusler, B., and Scholer, M.: Observation of energetic particles at very low  
489 altitudes near the geomagnetic equator, *Phys. Rev. Lett.*, **28**(20), 1340–1343,  
490 <https://doi.org/10.1103/PhysRevLett.28.1340>, 1972.

491 Hovestadt, D., Gloeckler, G., Fan, C. Y., Fisk, L. A., Ipavich, F.M., Klecker, B., O'Gallagher, J. J.,  
492 and Scholer, M.: Evidence for solar wind origin of energetic heavy ions in the Earth's radiation  
493 belt, *Geophys. Res. Lett.*, **5**(12), 1055–1057, <https://doi.org/10.1029/GL005i012p01055>, 1978.

494 Hovestadt, D., Klecker, B., Mitchell, E., Fennell, J. F., Gloeckler, G., and Fan, C. Y.: Spatial  
495 distribution of  $Z \geq 2$  ions in the outer radiation belt during quiet conditions, *Adv. Space Res.*,  
496 **1**(1), 305–308, [https://doi.org/10.1016/0273-1177\(81\)90125-3](https://doi.org/10.1016/0273-1177(81)90125-3), 1981.

497 Huston, S., Kuck, G., and Pfitzer, K.: Low-altitude trapped radiation model using TIROS/NOAA  
498 data, *Radiation Belts: Models and Standards*, edited by: Lemaire, J. F., Heynderickx, D., and  
499 Baker, D. N., AGU, Washington, D. C., 119–122, <https://doi.org/10.1029/GM097/p0119>, 1996.

500 Ilyin, B. D., Kuznetsov, S. N., Panasyuk, M. I., and Sosnovets, E.N.: Non-adiabatic effects and  
501 boundary of the trapped protons in the Earth's radiation belts, *Bulletin of the Russian Academy*  
502 *of Sciences: Physics*, **48**(11), 2200–2203, 1984.

503 Ipavich, F. M., Galvin, A. B., Gloeckler, G., Scholer, M., and Hovestadt D.: A statistical survey of  
504 ions observed upstream of the Earth's bow shock: Energy spectra, composition, and spatial  
505 variation, *J. Geophys. Res.*, **86**(A6), 4337–4342, <https://doi.org/10.1029/JA086iA06p4337>,  
506 1981a.

507 Ipavich, F. M., Scholer, M., and Gloeckler, G.: Temporal development of composition, spectra,  
508 and anisotropies during upstream particle events, *J. Geophys. Res.*, **86**(A13), 11153–11160,  
509 <https://doi.org/10.1029/JA086iA13p11153>, 1981b.

510 Kollmann, P., Roussos, E., Paranicas, C., Krupp, N., Jackman, C. M., Kirsch, E., and Glassmeier,  
511 K.-H.: Energetic particle phase space densities at Saturn: Cassini observations and  
512 interpretations, *J. Geophys. Res. Space Phys.*, **116**(A5), A05222,  
513 <https://doi.org/10.1029/2010JA016221>, 2011.

514 Kovtyukh, A. S.: Geocorona of hot plasma, *Cosmic Res.*, **39**(6), 527–558,  
515 <https://doi.org/10.1023/A:1013074126604>, 2001.

516 Kovtyukh, A. S.: Radial dependence of ionization losses of protons of the Earth's radiation belts,  
517 *Ann. Geophys.*, **34**(1), 17–28, <https://doi.org/10.5194/angeo-34-17-2016>, 2016a.

518 Kovtyukh, A. S.: Deduction of the rates of radial diffusion of protons from the structure of the  
519 Earth's radiation belts, *Ann. Geophys.*, **34**(11), 1085–1098. [https://doi.org/10.5194/angeo-34-](https://doi.org/10.5194/angeo-34-1085-2016)  
520 [1085-2016](https://doi.org/10.5194/angeo-34-1085-2016), 2016b.

521 Kovtyukh, A. S.: Ion Composition of the Earth's Radiation Belts in the Range from 100 keV to  
522 100 MeV/nucleon: Fifty Years of Research, *Space Sci. Rev.*, **214**(8), 124:1–124:30,  
523 <https://doi.org/10.1007/s11214-018-0560-z>, 2018.

524 Krimigis, S. M.: Alpha particles trapped in the Earth's magnetic field, *Particles and Fields in the*  
525 *Magnetosphere*, edited by: McCormac, B. M., D. Reidel, Dordrecht, Holland, 364–379, 1970.

526 Krimigis, S. M., Carbary, J. F., Keath, E. P., Bostrom, C. O., Axford, W. I., Gloeckler, G.,  
527 Lanzerotti, L. J., and Armstrong, T. P.: Characteristics of hot plasma in the Jovian  
528 magnetosphere: Results from the Voyager spacecraft, *J. Geophys. Res.*, **86**(A10), 8227–8257.  
529 <http://doi.org/10.1029/JA086iA10p08227>, 1981.

530 Kuznetsov, N. V., Nikolaeva, N. I., and Panasyuk, M. I.: Variation of the trapped proton flux in the  
531 inner radiation belt of the Earth as a function of solar activity, *Cosmic Res.*, **48**(1), 80–85,  
532 <https://doi.org/10.1134/S0010952510010065>, 2010.

533 Lui, A. T. Y., and Krimigis, S. M.: Several features of the earthward and tailward streaming of  
534 energetic protons (0.29–0.5 MeV) in the Earth's plasma sheet, *J. Geophys. Res.*, **86**(A13),  
535 11173–11188, <https://doi.org/10.1029/JA086iA13p11173>, 1981.

536 Lutsenko, V. N., and Nikolaeva, N. S.: Relative content and the range of alpha particles in the  
537 inner radiation belt of the Earth by measurements on satellite Prognoz-5, *Cosmic Res.*, **16**(3),  
538 459–462, 1978.

539 Mazur, J. E., Mason, G. M., Blake, J. B., Klecker, B., Leske, R. A., Looper, M. D., and Mewaldt,  
540 R. A.: Anomalous cosmic ray argon and other rare elements at 1–4 MeV/nucleon trapped within  
541 the Earth's magnetosphere, *J. Geophys. Res.*, **105**(A9), 21015–21023,  
542 <https://doi.org/10.1029/1999JA000272>, 2000.

543 McIlwain, C. E.: Coordinate for mapping the distribution of magnetically trapped particles, *J.*  
544 *Geophys. Res.*, **66**(11), 3681–3691, <https://doi.org/10.1029/JZ066i011p03681>, 1961.

545 Milovanov, A. V., Zelenyi, L. M., and Zimbardo, G.: Fractal structures and power law spectra in  
546 the distant Earth's magnetotail, *J. Geophys. Res. Space Phys.*, **101**(A9), 19903–19910,  
547 <https://doi.org/10.1029/96JA01562>, 1996.

548 Nakano, G., and Heckman, H.: Evidence for solar-cycle changes in the inner-belt protons, *Phys.*  
549 *Rev. Lett.*, **20**(15), 806–809, <https://doi.org/10.1103/PhysRevLett.20.806>, 1968.

550 Northrop, T. G.: *The Adiabatic Motion of Charged Particles*, Wiley-Interscience, NY, USA, 1963.

551 Panasyuk, M. I., and Sosnovets, E. N.: Differential energy spectrum of low-energy protons in the  
552 inner region of the radiation belt, *Cosmic Res.*, **11**(3), 436–440, 1973.

553 Panasyuk, M. I., Reizman, S. Ya., Sosnovets, E. N., and Filatov, V. N.: Experimental results of  
554 protons and  $\alpha$ -particles measurements with energy more 1 MeV/nucleon in the radiation belts,  
555 *Cosmic Res.*, **15**(6), 887–894, 1977.

556 Pizzella, G., McIlwain, C. E., and Van Allen, J. A.: Time variations of intensity in the Earth's  
557 inner radiation zone, October 1959 through December 1960, *J. Geophys. Res.*, **67**(4), 1235–  
558 1253, <https://doi.org/10.1029/JZ0670i004p01235>, 1962.

559 Pizzella, G., and Randall, B. A.: Differential energy spectrum of geomagnetically trapped protons  
560 with the Injun 5 satellite, *J. Geophys. Res.*, **76**(10), 2306–2312,  
561 <https://doi.org/10.1029/JA076i010p02306>, 1971.

562 Qin, M., Zhang, X., Ni, B., Song, H., Zou, H., and Sun, Y.: Solar cycle variations of trapped  
563 proton flux in the inner radiation belt, *J. Geophys. Res. Space Phys.*, **119**(12), 9658–9669,  
564 <https://doi.org/10.1002/2014JA020300>, 2014.

565 Sarris, E. T., Krimigis, S. M., Lui, A. T. Y., Ackerson, K. L., Frank, L. A., and Williams, D. J.:  
566 Relationship between energetic particles and plasmas in the distant plasma sheet, *Geophys. Res.*  
567 *Lett.*, **8**(4), 349–352, <https://doi.org/10.1029/GL008i004p0349>, 1981.

568 Schulz, M., and Lanzerotti, L. J.: *Particle Diffusion in the Radiation Belts*, Springer, NY, USA,  
569 1974.

570 Selesnick, R. S., Looper, M. D., and Mewaldt, R. A.: A theoretical model of the inner proton  
571 radiation belt, *Space Weather*, **5**(4), S04003, <https://doi.org/10.1029/2006SW000275>, 2007.

572 Selesnick, R. S., Hudson, M. K., and Kress, B. T.: Injection and loss of inner radiation belt protons  
573 during solar proton events and magnetic storms, *J. Geophys. Res. Space Phys.*, **115**(A8),  
574 A08211, <https://doi.org/10.1029/2010JA015247>, 2010.

575 Selesnick, R. S., Hudson, M. K., and Kress, B. T.: Direct observation of the CRAND proton  
576 radiation belt source, *J. Geophys. Res. Space Phys.*, **118**(12), 7532–7537,  
577 <https://doi.org/10.1002/2013JA019338>, 2013.

578 Selesnick, R. S., Baker, D. N., Jaynes, A. N., Li, X., Kanekal, S. G., Hudson, M. K., and Kress, B.  
579 T.: Observations of the inner radiation belt: CRAND and trapped solar protons, *J. Geophys.*  
580 *Res. Space Phys.*, **119**(8), 6541–6552, <https://doi.org/10.1002/2014JA020188>, 2014.

581 Selesnick, R. S., Baker, D. N., Kanekal, S. G., Hoxie, V. C., and Li, X.: Modeling the proton  
582 radiation belt with Van Allen Probes Relativistic Electron-Proton Telescope data, *J. Geophys.*  
583 *Res. Space Phys.*, **123**(1), 685–697, <https://doi.org/10.1002/2017JA024661>, 2018.

584 Selesnick, R. S., and Albert, J. M.: Variability of the proton radiation belt, *J. Geophys. Res. Space*  
585 *Phys.*, **124**(7), 5516–5527, <https://doi.org/10.1029/2019JA026754>, 2019.

586 Spjeldvik, W. N.: Expected charge states of energetic ions in the magnetosphere, *Space Sci. Rev.*,  
587 **23**(3), 499–538, <https://doi.org/10.1007/BF00172252>, 1979.

588 Spjeldvik, W. N., and Fritz, T. A.: Quiet time observations of equatorially trapped  
589 megaelectronvolt radiation belt ions with nuclear charge  $Z \geq 4$ , *J. Geophys. Res.*, **83**(A9), 4401–  
590 4405, <https://doi.org/10.1029/JA083iA09p04401>, 1978.

591 Spjeldvik, W. N., and Fritz, T. A.: Observations of energetic helium ions in the Earth's radiation  
592 belts during a sequence of geomagnetic storms, *J. Geophys. Res.*, **86**(A4), 2317–2328,  
593 <https://doi.org/10.1029/JA086iA04p02317>, 1981.

594 Stevens, J. R., Martina, E. F., and White, R. S.: Proton energy distributions from 0.060 to 3.3 MeV  
595 at 6.6 Earth radii, *J. Geophys. Res.*, **75**(28), 5373–5385,  
596 <https://doi.org/10.1029/JA075i028p05373>, 1970.

597 Usoskin, I. G., Alanko-Huotari, K., Kovaltsov, G. A., and Mursula, K.: Heliospheric modulation of  
598 cosmic rays: Monthly reconstruction for 1951–2004, *J. Geophys. Res.*, **110**(A12), A12108,  
599 <https://doi.org/10.1029/2005JA011250>, 2005.

600 Vacaresse, A., Boscher, D., Bourdarie, S., Blanc, M., and Sauvaud, J. A.: Modeling the high-  
601 energy proton belt, *J. Geophys. Res. Space Phys.*, **104**(A12), 28601–28613,  
602 <https://doi.org/10.1029/1999JA900411>, 1999.

603 Venkatesan, D., and Krimigis, S. M.: Observations of low-energy (0.3– to 1.8–MeV) differential  
604 spectrums of trapped protons, *J. Geophys. Res.*, **76**(31), 7618–7631,  
605 <https://doi.org/10.1029/JA076i031p07618>, 1971.

606 Vernov, S. N.: The Earth's radiation belts. In G. Bozóki, E. Gombosi, A. Sebastyén, A. Somogyi

607 (Eds.), Proc. 11<sup>th</sup> ICRC, Budapest, 85–162, 1969.  
 608 Westphalen, H., and Spjeldvik, W.N.: On the energy dependence of the radial diffusion coefficient  
 609 and spectra of inner radiation belt particles: Analytic solution and comparison with numerical  
 610 results, *J. Geophys. Res.*, **87**(A10), 8321–8326, <https://doi.org/10.1029/2000JA087iA10p08321>,  
 611 1982.  
 612 Wilken, B., Baker, D. N., Highbie, P. R., Fritz, T. A., Olson, W. P., and Pfitzer, K. A.:  
 613 Magnetospheric configuration and energetic particle effects associated with a SSC: A case study  
 614 of the CDAW 6 event on March 22, 1979, *J. Geophys. Res.*, **91**(A2), 1459–1473,  
 615 <https://doi.org/10.1029/JA091iA02p01459>, 1986.  
 616 Williams, D. J.: Phase space variations of near equatorially mirroring ring current ions, *J. Geophys.*  
 617 *Res.*, **86**(A1), 189–194, <https://doi.org/10.1029/JA086iA01p00189>, 1981.  
 618 Williams, D. J., and Frank, L. A.: Intense low-energy ion populations at low equatorial altitude, *J.*  
 619 *Geophys. Res.*, **89**(A6), 3903–3911, <https://doi.org/10.1029/JA089iA06p03903>, 1984.

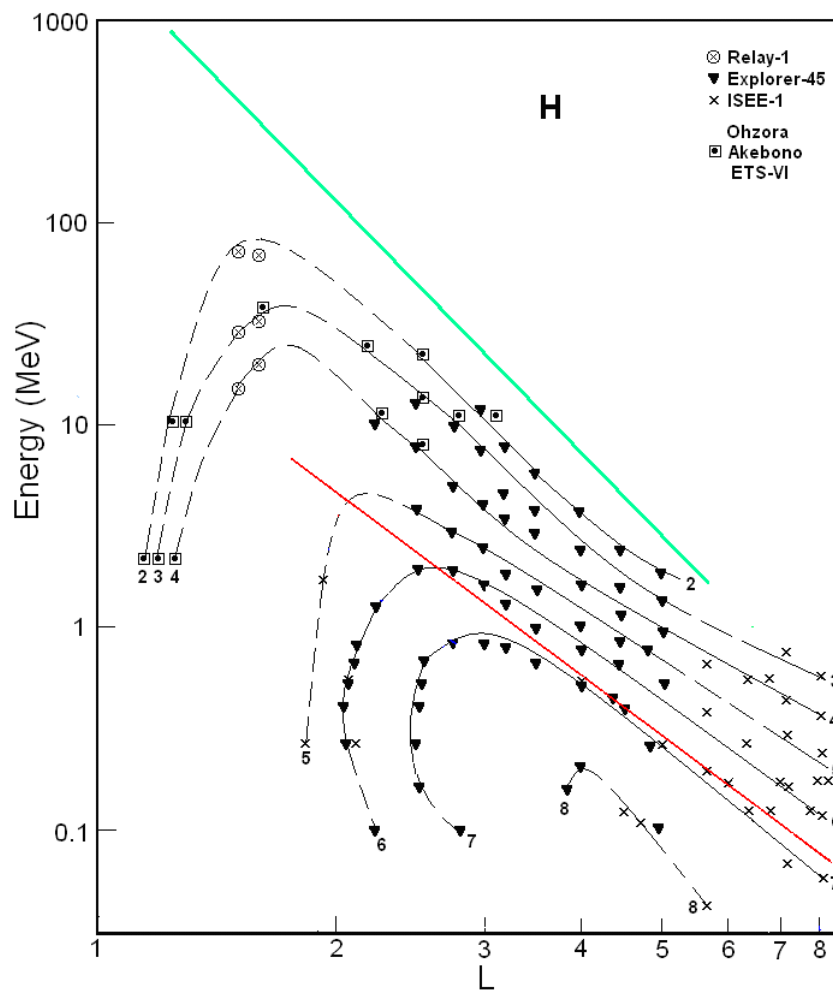

620  
 621 **Figure 1.** Proton fluxes in the ERB near minima of the solar activity. The numbers on the curves refer to the values of  
 622 the decimal logarithms of  $J$ , which is given in units of  $(\text{cm}^2 \text{ s ster MeV})^{-1}$ , is the differential fluxes of protons with  $\alpha_0 \approx$   
 623  $90^\circ$  (near the plane of the geomagnetic equator). Data of satellites are associated with different symbols. The red line  
 624 corresponds to the lower boundary of the power-law tail of the proton spectra; while green line corresponds to the  
 625 maximum energy of protons trapped in the ERB (Ilyin et al., 1984).

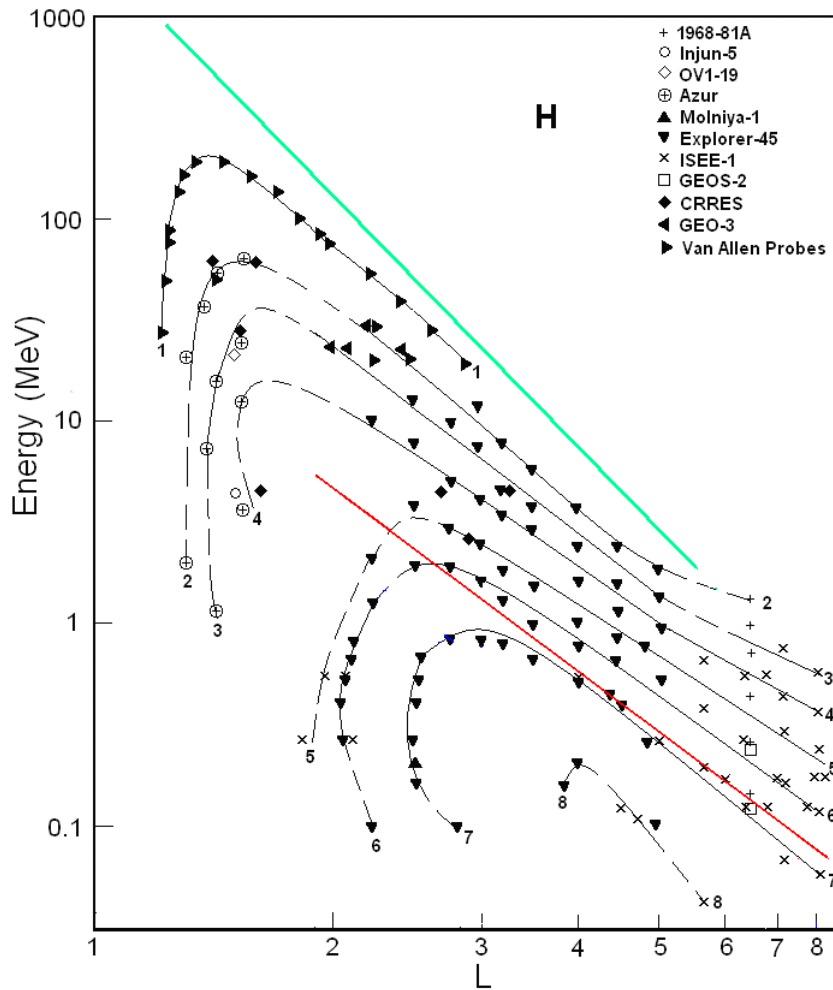

626  
627  
628  
629  
630  
631

**Figure 2.** Proton fluxes in the ERB near maxima of the solar activity. The numbers on the curves refer to the values of the decimal logarithms of  $J$ , which is given in units of  $(\text{cm}^2 \text{ s ster MeV})^{-1}$ , is the differential fluxes of protons with  $\alpha_0 \approx 90^\circ$  (near the plane of the geomagnetic equator). Data of satellites are associated with different symbols. The red line corresponds to the lower boundary of the power-law tail of the proton spectra; while green line corresponds to the maximum energy of protons trapped in the ERB (Ilyin et al., 1984).

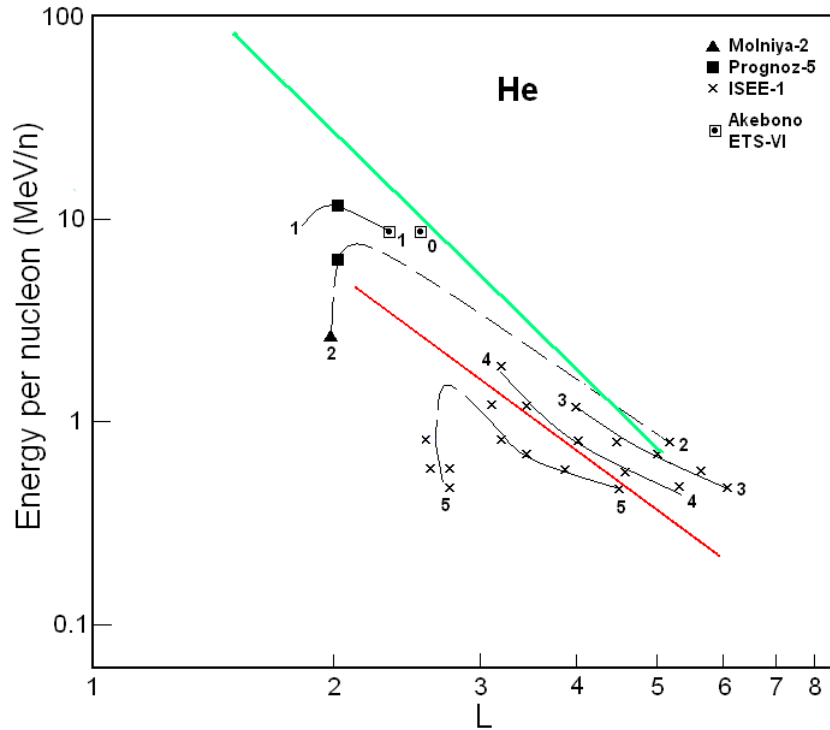

632  
 633 **Figure 3.** Helium ion fluxes in the ERB near minima of the solar activity. The numbers on the curves refer to the  
 634 values of the decimal logarithms of  $J$ , which is given in units of  $(\text{cm}^2 \text{ s ster MeV/n})^{-1}$ , is the differential fluxes of  
 635 helium ions with  $\alpha_0 \approx 90^\circ$  (near the plane of the geomagnetic equator). Data of satellites are associated with different  
 636 symbols. The red line corresponds to the lower boundary of the power-law tail of the helium spectra; while green line  
 637 corresponds to the maximum energy of these ions trapped in the ERB (Ilyin et al., 1984).

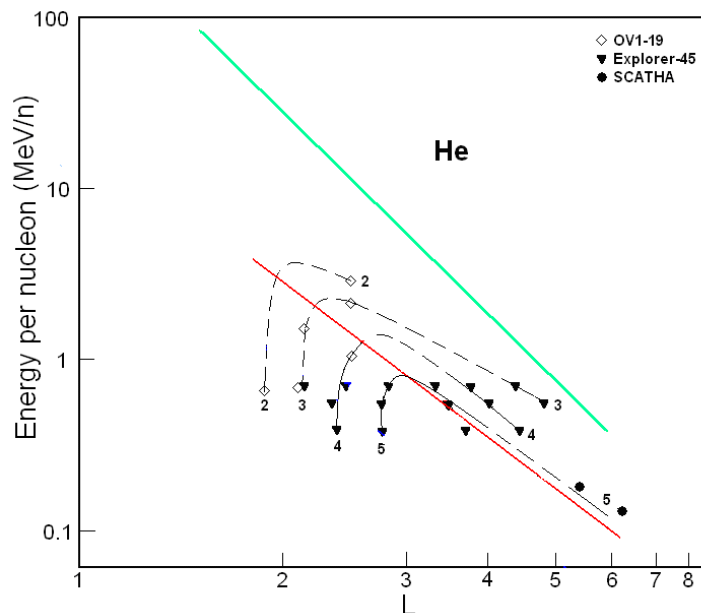

638  
 639 **Figure 4.** Helium ion fluxes in the ERB near maxima of the solar activity. The numbers on the curves refer to the  
 640 value of the decimal logarithms of  $J$  which is given in units of  $(\text{cm}^2 \text{ s ster MeV/n})^{-1}$ , is the differential fluxes of ions  
 641 with  $\alpha_0 \approx 90^\circ$  (near the plane of the geomagnetic equator). Data of satellites are associated with different symbols. The  
 642 red line corresponds to the lower boundary of the power-law tail of the helium spectra; while green line corresponds to  
 643 the maximum energy of these ions trapped in the ERB (Ilyin et al., 1984).



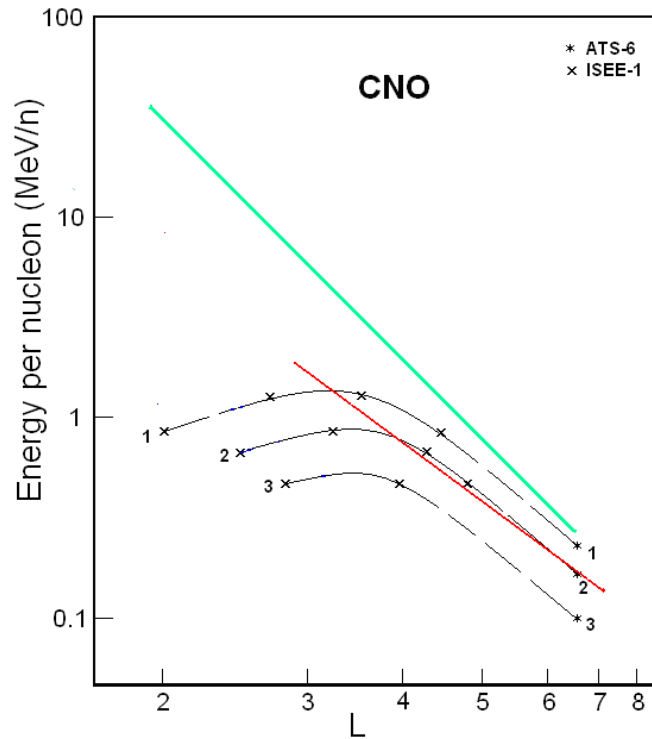

644  
 645 **Figure 5.** CNO ion fluxes in the ERB near minima of the solar activity. The numbers on the curves refer to the values  
 646 of the decimal logarithms of  $J$ , which is given in units of  $(\text{cm}^2 \text{ s ster MeV/n})^{-1}$ , is the differential fluxes of ions with  $\alpha_0$   
 647  $\approx 90^\circ$  (near the plane of the geomagnetic equator). Data of satellites are associated with different symbols. The red line  
 648 corresponds to the lower boundary of the power-law tail of the CNO ion spectra; while green line corresponds to the  
 649 maximum energy of these ions trapped in the ERB (Ilyin et al., 1984).

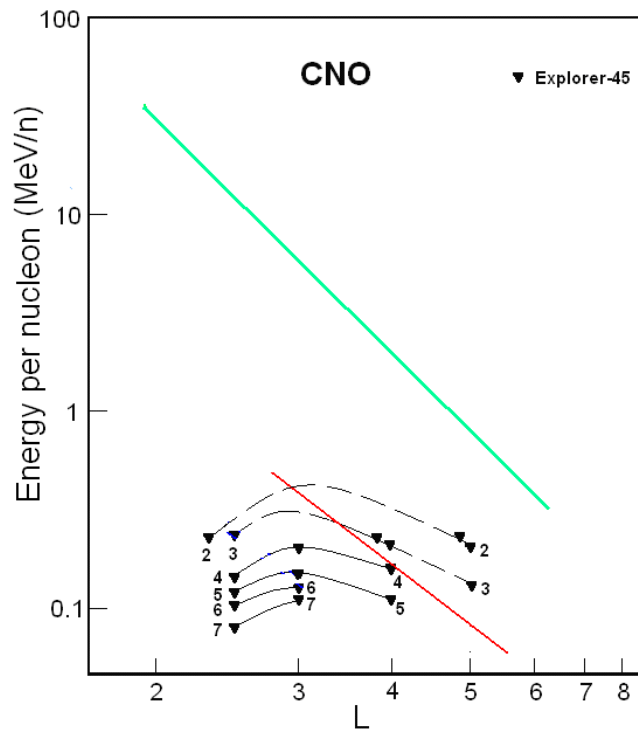

650  
 651 **Figure 6.** CNO ion fluxes in the ERB near the maximum of the solar activity. The numbers on the curves refer to the  
 652 values of the decimal logarithms of  $J$ , which is given in units of  $(\text{cm}^2 \text{ s ster MeV/n})^{-1}$ , is the differential fluxes of ions  
 653 with  $\alpha_0 \approx 90^\circ$  (near the plane of the geomagnetic equator). Data of satellites are associated with different symbols. The  
 654 red line corresponds to the lower boundary of the power-law tail of the CNO ion spectra; while green line corresponds  
 655 to the maximum energy of these ions trapped in the ERB (Ilyin et al., 1984).
