# Supplementary material for: Earth's radiation belts ions: Patterns of the spatial-energy structure and its solar-cyclic variations
Source: Copernicus journal article supplement (doi:10.5194/angeo-2019-152), 2019-11-07
Supplement: Supplementary file [file angeo-2019-152-RC2-supplement.pdf]

## Comments for the manuscript: “Earth’s radiation belts ions: Patterns of the spatial-energy structure and its solar-cyclic variations” by A. S. Kovtyukh

I think that the manuscript now is much linear and easy to read. I have just a few more corrections though, mostly concerning the fluency of the text and no more technical questions. The list is reported below.

| Line    | Comment                                                                                                                                                                                                                                                                                                                                                 |
|---------|---------------------------------------------------------------------------------------------------------------------------------------------------------------------------------------------------------------------------------------------------------------------------------------------------------------------------------------------------------|
| 12      | “[...] in the inner regions of the ERB, fluxes [...] ”                                                                                                                                                                                                                                                                                                  |
| 24-25   | “The ERB consist mainly of electrons and protons, but there are also helium nuclei and other [...] ”                                                                                                                                                                                                                                                    |
| 33      | “[...] geomagnetic trap, drift conserving [...] and populate [...] ”                                                                                                                                                                                                                                                                                    |
| 34-35   | “This layer is called the drift shell. ”                                                                                                                                                                                                                                                                                                                |
| 37      | “For the dipole magnetic field, L is [...] ”                                                                                                                                                                                                                                                                                                            |
| 42      | “[...] along a certain magnetic field line [...] ”                                                                                                                                                                                                                                                                                                      |
| 43-44   | “This dependence is described [...] ”                                                                                                                                                                                                                                                                                                                   |
| 45      | “[...] the same magnetic field line, respectively [...] ”                                                                                                                                                                                                                                                                                               |
| 48-49   | “[...] of radial diffusion of ions towards [...] ”                                                                                                                                                                                                                                                                                                      |
| 53      | “The inner belt ( $L < 2.5$ ) of protons with $E > 10$ MeV is formed by [...] ”                                                                                                                                                                                                                                                                         |
| 55      | “For protons with $E < 10$ MeV, this mechanism [...] ”                                                                                                                                                                                                                                                                                                  |
| 56      | “The inner belt of ions with $Z > 4$ is formed [...] ”                                                                                                                                                                                                                                                                                                  |
| 58-59   | “In the intermediate region ( $2.5 < L < 3.5$ ), the mechanism of a ion capture from the Solar Cosmic Rays takes place during strong magnetic storms [...] ”                                                                                                                                                                                            |
| 62      | “However, for a comprehensive verification [...] ”                                                                                                                                                                                                                                                                                                      |
| 76-77   | “[...] the possibility to create sufficiently complete and reliable empirical models [...] ”                                                                                                                                                                                                                                                            |
| 79-83   | “In the following sections, the spatial-energy structure of the ERB in the $\{E, L\}$ space for protons, helium and CNO group ions are considered (Sect. 2), together with possible physical mechanisms of formation of these structures and their solar-cyclic variations (Sect. 3). Finally, the main conclusions of this work are given (Sect. 4). ” |
| 89      | “According to this criterion and to the theory of [...] ”                                                                                                                                                                                                                                                                                               |
| 91      | “[...] represents this very boundary [...] ”                                                                                                                                                                                                                                                                                                            |
| 93-94   | “A significant number of these discrepancies can be connected to the [...] ”                                                                                                                                                                                                                                                                            |
| 107-108 | “[...] to separate fluxes of ions by their charge. Moreover, for the ions [...] ”                                                                                                                                                                                                                                                                       |
| 114-115 | “[...] the results of every experiment can be compared to the others [...] ”                                                                                                                                                                                                                                                                            |
| 119     | “Figures 1–6 show the spatial-energy distributions [...] ”                                                                                                                                                                                                                                                                                              |

120 I suggest removing entirely the quote “hese figures united in pairs: ” and just leave the part describing odd and even Figures

123-124 “The markers are connected by lines of equal intensity [...] ”

132 I suggest removing the quote “In this place, it is need to say a few words about the method of constructing these figures.[...] ”

147 “[...] corresponding set of experimental points (icons); then it was transferred [...] ”

185 “Figure N sums up results from [...] ”

188-189 “21<sup>st</sup> / 22<sup>nd</sup> / 23<sup>rd</sup> [...] ”

190 See line 185

198 See lines 188-189

205 “From a comparison of Figs. 1 and 2, one can see [...] ”

210 “[...] (2016a,b), which have been constructed from Figs. 1 and 2 confirm [...] ”

214 “[...]  $J \propto E^{-\gamma}$ , where the index  $\gamma =$  [...] ”

219 I would remove the “of the magnetic field” part here, magnetic field lines already describe everything

223 “Segments of iso-lines, that are parallel to the red line, also correspond to [...] ”

227 “at  $L = 3-6$ ,  $\gamma = 4.8 \pm 0.5$ . [...] ”

228 “between these iso-lines increase with  $L$  [...] ”

239 “[...] helium ion fluxes, averaged for quiet periods ( $Kp < 2$ ), are presented [...] ”

240 See line 185

244-245 See lines 188-189

246 See line 185

250 See lines 188-189

251 “with Figs. 3–4, one can see that [...] ”

253-254 “[...]  $E > 1$  MeV practically do not change, and [...] ”

255 “Figures 3 and 4 show the same patterns [...] ”

258 “[...] because there are no experimental data for helium ions in these regions. [...] ”

266 “For helium spectra [...] ”

270 “[...] the red line (i.e. in the region of power-law spectra) substantially deviate from [...] ”

278 “[...] CNO group ions fluxes, averaged for quiet periods ( $Kp < 2$ ), are [...] ”

280 See line 185

283-284 See lines 188-189

285 See line 185

286-287 “[...] period of activity [...] ”

289 “[...] nd its configuration differ [...] ”

291 “[...] Figs. 5–6 one can see that, for ions of CNO group, the [...] ”

297 “[...] This means that, for ions of the CNO group, the ionization [...] ”

300 “[...] have not been obtained by the experiments collected in [...] ”

304 “[...] especially large at the peak of solar activity (Fig. 6): during these times, the slope of iso-lines [...] ”

306 “At the same time, at  $L > 4$  in Fig. 5 and at  $L > 3$  in Fig. 6, the iso-lines [...] ”

316 “[...] at the minimum of solar activity [...] ”

319 “[...] following the results obtained [...] ”

324 “[...] and are reduced rapidly with [...] ”

328 “[...] have not been considered in these works [...] ”

329 “In quiet periods, only the mechanism of ionization loss is significant [...] ”

330 “[...] trapped in small L [...] ”

331 “[...] the ERB protons are determined, in this mechanism, by the density [...] ”

336 “[...] the proton supply rates to the inner belt, under the action of the CRAND mechanism, remain [...] ”

338 “[...] with decreasing solar activity [...] ”

341 “A proton lifetime on [...] ”

352 “[...] this was noted in sections [...] ”

357 “[...] where  $L^*$  corresponds to the L shell of protons of the same energy [...] ”

362 “[...] remains unchanged [...] ”

363-364 “[...] in fact, these protons form mainly under the action [...] ”

369 “[...] of radial diffusion of ions during the [...] ”

377 “[...] values of L, these fluxes begin [...] ”

384 “[...] highly turbulized region, but [...] ”

387 “[...] must be generated in the outer [...] ”

389 “The high-energy part of the ion [...] ”

390 “[...] has a power-law shape and the exponents [...] ”

394-395 “[...] along logarithmic axes E and J in a J(E) plane [...] ”

424 “[...] decreases rapidly with [...] ”

426 “Then, the lower boundary [...] ”

429 “Using  $B_s$  [...] ”

434-435 “[...] as a result of their interactions with the current layer [...] ”

439 “It has been found that in the outer belt [...] ”

438-439 “[...] in the near equatorial plane [...] ”

443 “[...] radial diffusion which conserves  $\mu$  [...] ”

448 “This kind of dependence of the amplitude [...] ”

461 “[...] the extensive gaps in  $Z \geq 2$  ion data do not allow [...] ”

640-644 For what concerns all the Figures, the captions are very similar, so I suggest a modification in the first one (Figure 1) that should be repeated for all the others: “[...] J, which is given in units of  $(\text{cm}^2 \text{ s ster MeV})^{-1}$ , is the differential flux of protons [...] ”. Also “associated with ” and “[...] the power-law tail of the proton spectra, while green line corresponds to [...] ”

---
