# Supplementary material for: Earth's radiation belts ions: Patterns of the spatial-energy structure and its solar-cyclic variations
Source: Copernicus journal article supplement (doi:10.5194/angeo-2019-152), 2019-11-07
Supplement: Supplementary file [file angeo-2019-152-RC4-supplement.pdf]

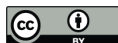

1 **Earth's radiation belts ions: Patterns of the spatial-energy structure**  
2 **and its solar-cyclic variations**

3 **Alexander S. Kovtyukh**

4 Skobeltsyn Institute of Nuclear Physics, Moscow State University, Moscow, 119234, Russia;  
5 kovtyukhas@mail.ru

6 **Abstract** Spatial-energy distributions of the stationary fluxes of protons, helium ions and ions  
7 of carbon-nitrogen-oxygen (CNO) group, with energy from  $E \sim 100$  keV to 200 MeV, in the  
8 Earth's radiation belts (ERB), at  $L \sim 1-8$ , are considered here by the data of the satellites for  
9 1961–2017. It is find that the results of these measurements line up in the space  $\{E, L\}$  by some  
10 regular patterns. Solar-cyclic (11-year) variations in the distributions of protons, helium ions  
11 and CNO group ions fluxes in the ERB are studied. In the inner regions of the ERB the ions  
12 fluxes decrease with increasing solar activity. It is find, the solar-cyclic variations of fluxes for  
13 ions with  $Z \geq 2$  are much greater than for protons and increase with increasing an atomic  
14 number  $Z$  of the ions. The possible physical mechanisms leading to formation of this spatial-  
15 energy structure and to the solar-cyclic variations of the ERB ion fluxes are discussed.

16  
17 **Keywords.** Magnetospheric physics (energetic particles, trapped). Radiation belts.  
18

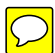

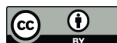

## 19 1 Introduction

20 The Earth's radiation belts (ERB) consist of charged particles with energy from  $E \sim 100$  keV to  
21 several hundreds of megaelectronvolt (MeV). These particles are trapped by the geomagnetic field  
22 at altitudes from  $\sim 200$  kilometers to  $\sim 50\text{--}70$  thousands kilometers. The ERB is consisted  
23 from electrons and protons. In the ERB there are also ions of helium, oxygen, and other elements  
24 with the atomic number  $Z \geq 2$ , where  $Z$  is the charge of the atomic nucleus with respect to the  
25 charge of the proton. During geomagnetic disturbances a fluxes of ions and its distributions are  
26 varied. These fluxes depend also on the phase of the solar cycle, conditions in the interplanetary  
27 space, and other factors.

28 Particles with different energy  $E$  and pitch angles  $\alpha$  ( $\alpha$  is the angle between a local vector of the  
29 magnetic field and vector of a particle velocity), which injected into some point of the geomagnetic  
30 trap, are drifted with conserving the adiabatic invariants ( $\mu$ ,  $K$ ,  $\Phi$ ) and populate a narrow layer  
31 surrounding the Earth (Alfvén and Fälthammar, 1963; Northrop, 1963). This layer call the drift  
32 shell. Therefore, experimental data on the ERB do most simply represented in coordinates  $\{L, B\}$ ,  
33 where  $L$  is parameter of a drift shell and  $B$  is a local induction of the magnetic field (McIlwain,  
34 1961). For the dipole magnetic field  $L$  is a distance, in the equatorial plane, from the given  
35 magnetic field line to the center of the dipole (in the Earth's radii  $R_E$ ).

36 The stationary fluxes  $J$  of the ERB particles with given energy and pitch angle  $\alpha$  are decreased  
37 usually when the point of observation is shifted from the equatorial plane to a higher latitudes  
38 along certain magnetic field line (if we exclude the peripheral regions of the geomagnetic trap,  
39 where the drift shells of the captured particles are split and branched). This dependence of the  
40 particle fluxes is described by the functions  $J(B/B_0)$ , were  $B$  and  $B_0$  are values of the magnetic field  
41 at the point of observation and in the equatorial plane on the same magnetic field line.

42 Outer and inner regions of the ERB maintained in the dynamic equilibrium with the  
43 environment by the different mechanisms (see review Kovtyukh, 2018).

44 The outer belt ( $L > 3.5$ ) of ions is formed mainly by the mechanisms of the radial diffusion of  
45 these ions to the Earth under the action of fluctuations of an electric and magnetic fields resonating  
46 with a drift periods of these ions. This transport accompanied by the betatron acceleration of ions  
47 and by the ionization losses of the ions in result of their interactions with the plasmasphere and  
48 with residual atmosphere.

49 The inner belt ( $L < 2.5$ ) of protons with  $E > 10$  MeV is formed mainly as a result of decay of  
50 neutrons knocked from the nuclei of the atmospheric atoms by the Galactic Cosmic Rays (GCR).  
51 For protons with  $E < 10$  MeV this mechanism (CRAND) is supplemented by the radial diffusion  
52 of particles from the outer to the inner belt. The inner belt of ions with  $Z > 4$  was formed mainly  
53 from the ions of the Anomalous component of Cosmic Rays (ACR).

54 In the intermediate region ( $2.5 < L < 3.5$ ) is operated also the mechanism of a capture of the  
55 ions from the Solar Cosmic Rays (SCR) during strong magnetic storms (see, e.g., Selesnick et al.,  
56 2014).

57 Thus, the main mechanisms of formation of the ERB, sources and losses of the ions are known.  
58 However, for the comprehensive verification of the physical models and to identification of the  
59 mathematical models parameters it is necessary sufficiently complete and reliable empirical  
60 models of the ERB for each of ion components. It is necessary also for ensuring the safety of space  
61 flights.

62 These models can be created only on a basis of the experimental data are obtained over many  
63 years and decades. Such models (see, e.g., Ginet et al., 2013) were created for protons (AP8/AP9).  
64 These models are widely used in the space research. However, measurements of fluxes of the ions  
65 with  $Z \geq 2$  are represented a difficult technical problem due to a small fluxes of these ions and  
66 high background fluxes of protons and electrons. The empirical and semi-empirical models of the  
67 ERB developed for ions with  $Z \geq 2$  are applicable only to very limited regions of the space  $\{E, L\}$ .

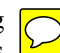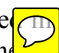



68 There are problems connected with limited and incomplete information on the fluxes of ions  
69 with  $Z \geq 2$  in the ERB, especially in the energy range from tens to hundreds of megaelectronvolt.  
70 One of the main problem of this work is to consider the possibility to create sufficiently complete  
71 and reliable empirical models of the ERB for these ions based on currently available world  
72 experimental data.

73 In the following sections are considered the spatial-energy structure of the ERB in the spaces  
74  $\{E, L\}$  for protons, helium ions and ions of the CNO group on the experimental data (Sect. 2),  
75 possible physical mechanisms of formation of these structures and its solar-cyclic variations are  
76 discussed (Sect. 3) and the main conclusions of this work are given (Sect. 4).

## 77 2 Spatial-energy distributions of the ion fluxes near the equatorial plane

78 There can be trapped on the drift shells only ions with energy less than some maximum values  
79 determining by the Alfvén's criterion:  $\rho_i(L, E, M_i, Q_i) \ll R_c(L)$ , where  $\rho_i$  is the gyroradii of ions,  
80 and  $R_c$  is the radius of curvature of the magnetic field near the equatorial plane ( $M_i$  and  $Q_i$  are mass  
81 and charge of ions with respect to the corresponding values for protons). According to this  
82 criterion and the theory of stochastic motion of particles, the geomagnetic trap can capture and  
83 durably hold only ions with  $E$  (MeV)  $< 2000 \times (Q_i^2/M_i) L^{-4}$  (Ilyin et al., 1984). The green line is  
84 present this boundary on Figs. 1–6.

85 When comparing the data of various experiments in the ERB, the question arises about the  
86 compatibility of these results with each other and the reasons for their discrepancies. More or less  
87 significant discrepancies in the results of the satellites can be connected with the differences in the  
88 trajectories of the satellites; in the construction of the instruments and their angular characteristics;  
89 in the energy ranges and sets of the energy channels. For the stationary ERB, these discrepancies  
90 can also be associated with differences in the general state of the Solar, heliosphere and  
91 magnetosphere of the Earth at the different measurements periods. These factors influence on the  
92 fluxes of ions with  $Z \geq 2$  in the ERB more significantly than on the proton fluxes (see, e.g.,  
93 Kovtyukh, 2018).

94 This section used experimental data of various satellites, which were obtained for quiet periods  
95 ( $Kp < 2$ ) and near the equatorial plane of the ERB for ions with equatorial pitch angles  $\alpha_0 \approx 90^\circ$ .  
96 The preference was given to the averaged results of these satellites for quiet periods. All values of  
97 differential fluxes reduced to one dimension. In the regions of  $E$  and  $L$  shells where these data were  
98 obtained the ion fluxes do not distorted by the background of other particles.

99 In many important experiments, the instruments did not allow separate fluxes of ions by charge  
100 of ions. For ions of the CNO group the separation by mass also are not performing usually. For  
101 heavier ions, for example for Fe ions, we have very smaller such data. Therefore, this work  
102 presents only helium ions (without separating them by charge) and ions of CNO group (without  
103 separating them by mass and charge).

104 To solve the problems considered here, it is important to choose the form of representation  
105 (space of variables), in which the results of different experiments can be conformed to each other  
106 naturally. For such representation of the distributions of the ion fluxes have been chosen the space  
107  $\{E, L\}$ . Such representation is possible to organize of a fragmentary experimental data obtained in  
108 different ranges of  $E$  and  $L$  most effectively.

109 Figures 1–6 presented here the spatial-energy distributions of the fluxes of protons, helium ions,  
110 and ions of the CNO group near the equatorial plane. These figures are paired: odd figures refer to  
111 periods near the minima, and even figures refer to periods near the solar activity maxima. The  
112 values  $E$  and  $L$  in these figures are presented in logarithmic scales. Experimental points on these  
113 figures connected by lines of the equal intensity of ion fluxes (iso-lines); the decimal logarithms of  
114 the fluxes  $J$  are shown near each iso-lines. The ion fluxes  $J$  have a dimension  $(\text{cm}^2 \text{ s ster MeV/n})^{-1}$   
115 and are corresponded to the energies  $E$  (MeV/n) and an equatorial pitch angle of  $\alpha_0$  is  $\sim 90^\circ$ .



116 Such representations of the experimental data are not only visual, but also are very convenient  
117 and rather universal. Obviously, Figs. 1–6 actually show both radial profiles of the fluxes of ions  
118 for a given energy (if one see along the abscissa axis) and ion energy spectra for a given  $L$  shell (if  
119 one see along the ordinate axis).

120 In this place, it is need to say a few words about the method of constructing these figures. The  
121 points in Figs. 1–6 are obtained from the dependences  $J(L)$  for a given ions with a certain energy  
122 (the average energy for each channel) and with an equatorial pitch angle close to  $90^\circ$ . Unlike a  
123 distributions of electrons, as well as ion distributions connected with magnetic disturbances, the  
124 dependences  $J(L)$  for the ERB ions with  $\alpha_0 \sim 90^\circ$  usually have only one maximum in a quiet time.  
125 As a result, for each experiment 1 or 2 points were obtained (on the outer and inner edges of this  
126 profile) with certain values of  $E$  and  $L$  for a given level of stationary ion fluxes. Sometimes,  
127 especially for low levels of fluxes, only one point was obtained: in these cases, the radial profile of  
128 the ion fluxes was cutoff at small  $L$  by a significant background of other particles. In these cases,  
129 no interpolations and extrapolations of the radial profiles of ion fluxes does performing here.

130 Each iso-line shown in these figures was built separately, for the corresponding set of  
131 experimental points (icons); after that this iso-line was transferred (along with the icons) to the  
132 corresponding figure. Thus, in the region abundantly populated by such icons (for protons with  $E >$   
133  $1$  MeV at  $L > 2$ ) they are mixing in Figs. 1–2. In the cases of a large distances between neighbor  
134 points, the corresponding segments of the iso-lines are shown in dotted arcs in these figures.

135 The radial profiles of the differential fluxes  $J(L)$  shown on uniform presentation for particles of  
136 different energies are intersect with each other in those regions where the energy spectra of these  
137 fluxes are have a local maximum or minimum. In contrast, the flux iso-lines cannot intersect each  
138 other: this would mean that at the same point in the space  $\{E, L\}$  the proton fluxes differ very  
139 significantly (by an order of magnitude for the flux step selected here). Such uncertainty does not  
140 have a physical sense and means a complete discrepancy and contradiction to each other of two  
141 close series of data obtained in different experiments. In this case, a special analysis is needed to  
142 identify all the errors and differences in the conditions for different measurements, in order to  
143 reconcile them with each other.

144 The largest errors of our method are connected with drawing iso-lines of fluxes along  
145 heterogeneous sets of experimental points (the errors of these points themselves do not exceed of  
146 the size of the icons on Figs. 1–6). This uncertainty of our work is open for constructive criticism,  
147 and these figures themselves are open for possible corrections and additions.

148 The synthesis of the experimental data on the fluxes of ERB ions in other representations (in  
149 other spaces of variables) leads to more significant methodological errors and uncertainties. For  
150 example, one can present ion fluxes obtained in various experiments for different energy channels  
151 depending on  $L$  (radial profiles of fluxes). However, the sets of these channels are different in  
152 different experiments. To compare the radial profiles of ion fluxes for different experiments, it is  
153 necessary to bring these fluxes to the same set of energy values. This can made by energy spectra,  
154 but due to discreteness of these spectra, the procedures of their approximation, interpolation, and  
155 extrapolation are inevitable. But this work can be done in different ways. With that, methodical  
156 errors and uncertainties in the final picture acquire a hidden form. They can be tracked only if  
157 consistently, step by step, repeating all these procedures for the experimental data.

## 158 2.1 Spatial-energy structure of the proton fluxes

159 There is a great quantity of the experimental data on the ERB protons. The most important of them  
160 are presented in the space  $\{E, L\}$  on Figs. 1 and 2. These figures are needed here for comparison  
161 with similar distributions of ions with  $Z \geq 2$  on the Figs. 3–6.

162 Figure 1 represent a results of the satellites Relay-1 (Freden et al., 1965); Ohzora or EXIS C:  
163 Exospheric Satellite C, Akebono or EXOS-D: Exospheric Satellite D and ETS-VI: Engineering Test

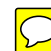



164 Satellite (Goka et al., 1999). These results were obtained near minima between 19<sup>th</sup> and 20<sup>th</sup>  
165 (1963), 21<sup>th</sup> and 22<sup>th</sup> (1984–1985), and 22<sup>th</sup> and 23<sup>th</sup> (1994–1996) of the solar activity cycles.

166 Figure 2 represent a results of the satellites 1968-81A (Stevens et al., 1970), Injun-5 or  
167 Explorer-40 (Krimigis, 1970; Venkatesan and Krimigis, 1971; Pizzella and Randall, 1971), 1969-  
168 025C or OV1-19: Orbiting Vehicle 1-19 (Croley et al., 1976), Azur or GRS A: German Research  
169 Satellite A (Hovestadt et al., 1972; Westphalen and Spjeldvik, 1982), Molniya-1 (Panasyuk and  
170 Sosnovets, 1973), GEOS-2: Geodetic Earth Orbiting Satellite 2 (Wilken et al., 1986), CRRES: The  
171 Combined Release and Radiation Effects Satellite (Albert et al., 1998; Vacaresse et al., 1999), GEO-  
172 3: Geostationary Orbit 3 (Selesnick et al., 2010) and Van Allen Probes (Selesnick et al., 2014,  
173 2018). These results were obtained near maxima of solar activity in 20<sup>th</sup> (1968–1971), 22<sup>th</sup> (1990–  
174 1991), 23<sup>th</sup> (2000), and 24<sup>th</sup> (2012–2017) solar cycles.

175 The data of the satellites Explorer-45 (Fritz and Spjeldvik, 1979, 1981) and ISEE-1:  
176 International Sun-Earth Explorer 1 or Explorer-56 (Williams, 1981; Williams and Frank, 1984) are  
177 given in Figs. 1 and 2 at  $L > 2.5$  where solar-cyclic variations of the ERB proton fluxes are  
178 practically do not observed (see, e.g., Vacaresse et al., 1999).

179 Other experimental data on ERB protons could be added to these results, but they do not change  
180 the general picture shown in Figs. 1 and 2.

181 From a comparison of Figs. 1 and 2 one can see that at  $L < 2.5$  (especially at  $L < 1.4$ ) the proton  
182 fluxes in the minima of solar activity (Fig. 1) are higher than in the maxima of solar activity (Fig.  
183 2). In addition, in the minima of solar activity the inner edge of the proton belt is less steep and  
184 achieve smaller  $L$  shells (for  $E > 1$  MeV). The distribution functions of protons  $f(\mu, K, L)$  in the  
185 phase space constructed from Figs. 1 and 2 confirm these conclusions.

186 In Figs. 1 and 2, the iso-lines of proton fluxes are almost parallel to each other on  $L > 3$  at  
187 sufficiently high energies. Since these iso-lines are separated from each other by approximately  
188 equal intervals on a logarithmic scale of the energy, this region in the space  $\{E, L\}$  corresponds to  
189 power-law spectra of the ERB protons. In these figures, this region is located between the green  
190 and red lines.

191 The red line is corresponded to the lower boundary ( $E_b$ ) of the power-law tail of the proton  
192 spectra. For this line,  $E_b \sim 36 \times L^{-3}$  MeV. Some changes in the slope of these iso-lines at  $L > 6$  can  
193 be connected with an essential distinction of the magnetic field in this region from the dipole  
194 configuration (the  $L$  shells were calculated for a dipole field).

195 For the dipole magnetic field region, the points on the red line correspond to particles with a  
196 specific value of the 1<sup>st</sup> adiabatic invariant of motion ( $\mu_b$ ). For Figs. 1 and 2, the average value  $\mu_b$   
197 is  $\sim 1.16$  keV nT<sup>-1</sup>. Segments of an iso-lines that are parallel to the red line also correspond to a  
198 certain values of the invariant  $\mu$ . In this region of the space  $\{E, L\}$  the ionization and other losses  
199 of the ERB protons during radial drift can be neglected, and the fluxes changes with changing of  $L$   
200 are practically reduced to adiabatic transformations the fluxes in a magnetic field.

201 It is results from these figures that at  $L = 3-6$  the value  $\gamma = 4.8 \pm 0.5$ . At  $L > 6$  the distances  
202 between these iso-lines are increased with  $L$ , and the value  $\gamma$  is decreased from  $\sim 4.7-5.0$  at  $L = 6$   
203 to  $\sim 4.1-4.5$  at  $L = 8$ . This is due to the deviation of the magnetic field from the dipole  
204 configuration as well as to the increasing variability of this field with increasing  $L$ .

205 According to the data of satellites considered in (Kovtyukh, 2001), invariant parameters  $\mu_b$  and  $\gamma$   
206 were found only at  $L > 3$ . In this work is considered the wider range of  $L$  and  $E$ , and for protons with  
207  $E > 10$  MeV these parameters can be traced to  $L \sim 2$ . At  $L = 2$ ,  $\gamma = 4.4 \pm 0.6$  (Fig. 1) and  $\gamma = 4.7 \pm 1.3$   
208 (Fig. 2). This is due to that the energy range here is significantly extended toward higher energies (up  
209 to 200 MeV), but with increasing the energy of the ERB protons the ionization losses are decreased  
210 rapidly (see, e.g., Schulz and Lanzerotti, 1974; Kovtyukh, 2016a).

211  
212

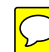



## 2.2 Spatial-energy structure of the helium ion fluxes

In Figs. 3 and 4 are presented helium ions fluxes averaged for quiet periods ( $K_p < 2$ ).

Figure 3 represent the data of the satellites Molnija-2 (Panasyuk et al., 1977), Prognoz-5 (Lutsenko and Nikolaeva, 1978), ISEE-1: The International Sun-Earth Explorer 1 (Hovestadt et al., 1981); Akebono or EXOS-D: Exospheric Satellite D and ETS-VI: Engineering Test Satellite (Goka et al., 1999). These results were obtained near minima between 20<sup>th</sup> and 21<sup>th</sup> (1975–1977), between 21<sup>th</sup> and 22<sup>th</sup> (1984–1985), and between 22<sup>th</sup> and 23<sup>th</sup> (1994–1996) of the solar activity cycles.

Figure 4 represent the data of the satellites OV1-19: Orbiting Vehicle 1-19 (Blake et al., 1973; Fennell and Blake, 1976), Explorer-45 (Fritz and Spjeldvik, 1978, 1979; Spjeldvik and Fritz, 1981), SCATHA: Spacecraft Charging At High Altitudes (Blake and Fennell, 1981; Chenette et al., 1984). These results were obtained near maxima of solar activity in 20<sup>th</sup> (1968–1971) and 21<sup>th</sup> (1979) solar cycles.

From a comparison of Figs. 1–2 with Figs. 3–4 one can see that at  $L > 2$  for helium ions the solar-cyclic (11-year) variations are greater than for protons. For example, at  $L \sim 2-3$  from maximum to minimum of solar activity fluxes of protons with  $E > 1$  MeV practically do not changed, and the fluxes of helium ions with  $E > 1$  MeV/n are increased by one order of magnitude.

Figures 3 and 4 have the same patterns are observed as for protons, but the distribution of helium ion fluxes is slightly shifted away from the Earth (with respect to protons). Unlike protons, there are significant “white spots” for helium ions in this picture.

The red line on these figures is corresponded to the lower boundary of the power-law tail of the helium ions spectra. For this line,  $E_b/M_i \sim 43.4 \times L^{-3}$  MeV/n (Fig. 3) and  $E_b/M_i \sim 21.7 \times L^{-3}$  MeV/n (Fig. 4). If one take into account that for helium ions with  $E > 0.2$  MeV/n at  $L < 6$  the average charge  $Q_i$  is +2 (see, e.g., Spjeldvik, 1979), then for the considered boundary we get:  $\mu_b \sim 1.4 \times Q_i$  keV/n $\times$ nT<sup>-1</sup> at the maximum of solar activity and  $\mu_b \sim 1.4 \times M_i$  keV/n $\times$ nT<sup>-1</sup> at the minimum of solar activity (for the dipole magnetic field region). The iso-lines of helium ion fluxes in Figs. 3 and 4, which pass above the red line at  $L > 2.5$  are corresponded average value of  $\gamma \sim 5.5$ .

For helium ions, as for protons, the values of the parameters of the power-law tail of their spectra are approximately in the middle of the ranges of these parameters, which were obtained by other methods (Kovtyukh, 2001).

At the same time, one can see that the isolines of the fluxes of helium ions in the region above the red line (in the region of power-law spectra) have at a substantial slope to the red line. At  $L > 3$  the fluxes of helium ions with given energy are increased with decreasing  $L$  more slowly than follows from adiabatic transformations of the fluxes. In accordance to well-known calculations (see, e.g., Schulz and Lanzerotti, 1974), this is means that the ionization losses of the ERB helium ions significantly exceed these losses for protons.

## 2.3 Spatial-energy structure of the CNO group ions fluxes

In Figs. 5 and 6 are presented CNO group ions fluxes averaged for quiet periods ( $K_p < 2$ ).

Figure 5 represent the data of the satellites ATS-6: Applications Technology Satellite 6 (Spjeldvik and Fritz, 1978; Fritz and Spjeldvik, 1981) and ISEE-1: The International Sun-Earth Explorer 1 (Hovestadt et al., 1978). These results were obtained near the minimum between 20<sup>th</sup> and 21<sup>th</sup> of the solar activity cycles (1974–1975, 1977).

Figure 6 represent the data of the satellite Explorer-45 (Spjeldvik and Fritz, 1978; Fritz and Spjeldvik, 1981). These results were obtained near the maximum of solar activity in 20<sup>th</sup> solar cycle (1971–1972).

On Figs. 5–6 the spatial-energy patterns of the fluxes for the CNO group ions is even more shifted away from the Earth and its configuration differ significantly from the Figs. 1–4.

From a comparison of Figs. 1–2 with Figs. 5–6 one can see that for ions of CNO group the solar-cyclic (11-year) variations are greater than for protons. For example, at  $L \sim 3-5$  from



261 maximum to minimum of solar activity fluxes of protons with  $E > 1$  MeV practically do not  
262 changed, but the fluxes of the CNO group ions are increase by one order of magnitude and more.  
263 From a comparison of Figs. 3–4 with Figs. 5–6 it is seen also that the fluxes of CNO group ions  
264 varies by several times greater than the fluxes of helium ions.

265 This is mean that for ions of the CNO group the ionization losses at  $L = 3–5$  are much larger  
266 than for ions with  $Z \leq 2$  and these losses have a significant effect even on the power-law segment  
267 of the spectra of the CNO ions (in the part which is seen on Figs. 5–6). Therefore, the lower  
268 boundary of the power-law tail of these ions spectra is not monitored on the data given in Figs. 5  
269 and 6. The red line on these figures is rather arbitrary: it corresponds to adiabatic laws that are not  
270 performed here, but this line let us to trace these deviations. As can be seen from fig. 5–6,  
271 ionization losses for ions of the CNO group are especially large at the maximum of solar activity  
272 (Fig. 6): in these times the slope of iso-lines on  $L > 3$  is significantly less than the slope of the red  
273 line.

274 At the same time, at  $L > 4$  in Fig. 5 and at  $L > 3$  in Fig. 6 the iso-lines of fluxes pass almost  
275 parallel to each other and at approximately equal distances from each other; the average value of  $\gamma$   
276 corresponding to them is  $\sim 6$ . Thus, for sufficiently large values of  $E$  and  $L$ , the CNO group ions  
277 spectra in the ERB have a power-law form, but these spectra are softer in comparison with the  
278 spectra of protons.

279 The red line corresponds here to the dependences  $E_b/M_i \approx 43.4 \times L^{-3}$  MeV/n (on Fig. 5) and  $E_b/M_i$   
280  $\sim 12.4 \times L^{-3}$  MeV/n (on Fig. 6), which are taken from (Kovtyukh, 2001) where this boundary was  
281 more clearly defined also for the ions of the CNO group. If one take into account that for the CNO  
282 group ions with  $E > 0.1$  MeV/n at  $L \sim 3–5$  the average charge  $Q_i$  is  $+4$  (see, e.g., Spjeldvik and  
283 Fritz, 1978), then for this boundary one can get:  $\mu_b \sim 1.4 \times Q_i$  keV/n $\times$ nT $^{-1}$  at the maximum of solar  
284 activity and  $\mu_b \sim 1.4 \times M_i$  keV/n $\times$ nT $^{-1}$  at the minima of solar activity (for the dipole magnetic field  
285 region).

### 286 3 Discussion

287 Let us consider the conclusions following from the results obtained here for solar-cyclic variations  
288 in the fluxes of ERB ions. Solar-cyclic (11-year) variations of proton fluxes with  $E > 1$  MeV in the  
289 inner region of the ERB considered in many works (see, e.g., Pizzella et al., 1962; Hess, 1962;  
290 Blanchard and Hess, 1964; Filz, 1967; Nakano and Heckman, 1968; Vernov, 1969; Dragt, 1971;  
291 Huston et al., 1996; Vacaresse et al., 1999; Kuznetsov et al., 2010; Qin et al., 2014). These  
292 variations achieve one order of magnitude at  $L = 1.14$  and reduce rapidly with increasing  $L$  (see,  
293 e.g., Vacaresse et al., 1999).

294 In these works, such variations of the proton fluxes of the inner belt are connected to the solar-  
295 cyclic variations of the energy loss rates of protons in this region. However, solar-cyclic variations  
296 of fluxes of ions with  $Z \geq 2$  were not considered in these works.

297 In quiet periods, only the mechanism of ionization losses is significant for the ERB protons  
298 trapped on small  $L$  shells (see, e.g., Schulz and Lanzerotti, 1974). Energy loss rates and lifetimes of  
299 the ERB protons are determined in this mechanism by the density of atmospheric atoms and  
300 ionospheric plasma ( $N$ ) in a geomagnetic trap. This density is depend on the intensity of the  
301 ultraviolet radiation of the Sun.

302 With decreasing solar activity (with a transition from maximum to minimum of the solar cycle),  
303 the densities of atmospheric atoms and ionospheric plasma in a geomagnetic trap are decreased. If  
304 the proton supply rates to the inner belt under the action of the CRAND mechanism remain  
305 unchanged or the effect of these changes is weaker than the effect connected with changes of loss  
306 rates of the protons, the stationary proton fluxes will increased with the solar activity decreasing.

307 The lifetimes of protons increase with  $L$ , and it lead to decreasing in the amplitude of the solar-  
308 cyclic variations of a proton fluxes. The proton lifetime on a given  $L$  shell depends on their energy



309 and is less than 11 years at  $L < L^*(E)$ . For example, for protons with  $E \sim 10$  MeV the value  $L^*$  is  $\sim$   
310 2.5 (see, e.g., Kovtyukh, 2016a). Figs. 1 and 2 show that for protons the solar-cyclic variations of  
311 fluxes are small and localized at  $L < 2.5$  (mainly at  $L < 1.4$ ).

312 In contrast to protons, Figs. 3–6 show significant solar-cyclic variations of fluxes of helium ions  
313 and CNO group ions at  $L \sim 2$ –5. These variations one can explain by the same mechanism, which  
314 suggested for proton fluxes at  $L < 2.5$ .

315 For ions with  $Z \geq 2$  in the ERB ionization losses are more significant than for protons. With this  
316 fact one can connect the absence of ions with  $Z \geq 2$  at  $L < 2$  (or very low values of these fluxes)  
317 during quiet geomagnetic conditions. More short lifetimes of these ions compare to protons are  
318 manifested also in the slope of the experimental curves in Fig. 4 and 6 (this was noted in sections  
319 2.2 and 2.3, respectively). Consequently, for ions with  $Z \geq 2$  the regions in which the solar-cyclic  
320 variations can manifested should be located on higher  $L$  shells (at the same energies as for  
321 protons).

322 The lifetimes of ions of the energies considered here are  $\tau \propto M_i^{-1/2} Q_i^{-2} N^{-1} E^{3/2}$  (Schulz and  
323 Lanzerotti, 1974). In a first approximation, for  $N \propto L^{-4}$ , we obtain the value  $L_i^* \sim (M_i^{1/2} Q_i^2)^{1/4} L^*$ ,  
324 where  $L^*$  corresponds to protons of the same energy as other ions. For helium ions ( $M_i = 4$ ,  $Q_i = 2$ )  
325 with  $E \sim 10$  MeV, we obtain  $L_i^* \sim 4.2$ . For ions of CNO group ( $M_i = 14$ ,  $Q_i = 4$ ) with  $E \sim 10$  MeV we  
326 obtain  $L_i^* \sim 6.9$ . These is very rough estimates, but they correspond to results presented in Figs. 3–6.

327 These estimates are based on the following assumption: during variations in solar activity, the rates  
328 of ion supply on  $L < L_i^*$  remain unchanged (or these changes are weaker than the effect of changes of  
329 the rate of ion losses). This assumption is real for protons with  $E > 10$ –20 MeV at  $L < 2.2$ : the fluxes  
330 of these protons forming mainly under the action of the CRAND mechanism. However, at  $L > 2.2$  the  
331 stationary ion fluxes of the ERB forming mainly under the action of radial diffusion (see, e.g., Schulz  
332 and Lanzerotti, 1974; Kovtyukh, 2016b, 2018). Therefore, the solar-cyclic variations of fluxes for ions  
333 with  $Z \geq 2$  one can explain only under the assumption that the effect connected with an increasing in  
334 the ionization losses of such ions significantly exceeds the effect connected with the possible enhance  
335 of radial diffusion of ions on the growth phase of solar activity.

336 In the experimental results presented here for the ERB ions, the region of the power-law tail of  
337 the ion spectra is distinguished. For many experiments, especially for heavy ions, the values of the  
338 parameter of a power-law tail spectra are determined much more accurately by the dependences  
339  $J(L)$  of the ion fluxes (in the logarithmic scale) for different pairs of energy channels (see  
340 Kovtyukh, 2001). For example, the range  $L$  in which these dependences for two energy channels  
341 are parallel to each other is corresponded to the power-law tail of the spectra. On smaller  $L$  these  
342 fluxes begin to converge and radial dependences of the fluxes intersect with each other which is  
343 corresponded to the maximum in the spectra. Consider here the physical mechanisms leading to  
344 the formation of power-law distributions of ions of the ERB.

345 The main source of ions in the outer regions of the ERB is the solar wind, and the high-energy  
346 part of these spectra have an exponential shape usually (see, e.g., Ipavich et al., 1981a, 1981b).  
347 Immediately before being captured into the magnetosphere, these ions pass through a highly  
348 turbulized regions, but the high-energy part of their spectra usually retains an exponential shape.  
349 Therefore, the question arises: what physical mechanism converts the form of ion spectra from  
350 exponential to power-law?

351 Evidently, the power-law tail of the ERB ions spectra must be generate-in the outer regions of  
352 the magnetosphere. The most likely region for this is the plasma sheet (PS) of the magnetospheric  
353 tail, which is adjacent to the geomagnetic trap. High-energy part of the ion spectra in the PS, at  $R \sim$   
354 20–40  $R_E$ , have power-law shape and the exponents of these spectra is close to the corresponding  
355 parameters of the spectra of ions in the ERB. On the data of the satellites IMP-7 and IMP-8:  
356 Interplanetary Monitoring Platform 7 and 8 (Sarris et al., 1981; Lui et al., 1981) and also satellite  
357 ISEE-1 (Christon et al., 1991), the shape of the ion spectra of the PS usually do not changed during





358 substorms; they produce only parallel shifts of the spectra along logarithmic axes  $E$  and  $J$ . These  
359 results point out that the time scales of formation processes of these ion spectra in the PS are far  
360 exceeds the times of substorms.

361 Parameters of the power-law tail of the ion spectra of the outer belt ( $\gamma$  and  $\mu_b$ ) reflect,  
362 apparently, the most fundamental features of the mechanisms of acceleration of ions in the tail of  
363 the magnetosphere. One can try to connect the values of these parameters with the most general  
364 representations about the mechanisms and character of ion acceleration in the PS of the  
365 magnetospheric tail.

366 Most likely, this part of the ion energy spectra formed in the PS by stochastic mechanisms of  
367 the ion acceleration. This hypothesis supported by many experimental results. Statistical character  
368 of these mechanisms reveal itself, in particular, in the fact that the ratios of fluxes (and partial  
369 densities) of ions with different  $Z$  can be differ greatly at low and high energies. During wander in  
370 the phase space, ions gradually forget their origin and, therefore, the high-energy tails of the ion  
371 spectra do not contain unambiguous information on the partial densities of different components of  
372 ions in the source (see, e.g., Kovtyukh, 2001).

373 The high-energy part of the ion spectra of the PS can be generated by the mechanisms of  
374 acceleration of particles on magnetic irregularities moving relative to each other (Fermi  
375 mechanism). The fractal structures of the PS reveal itself on scales from  $\sim 0.4$  to  $\sim 8$  thousands  
376 kilometers, for example, in the data of the satellite Geotail (Milovanov et al., 1996). If mass of the  
377 ions are small compare to masses of the magnetic irregularities in the PS, the average values of the  
378 index  $\gamma$  of the power-law tail of the spectra should not depend on mass and charge of these ions.

379 Under equilibrium conditions, this parameter is determined by the average part of energetic ions  
380 in the total energy density of particles and magnetic irregularities ( $\bar{\beta}$ ). From the theory which was  
381 developed by Ginzburg and Syrovatskii (1964), it is follows:  $\gamma - 1 \approx (1 - \bar{\beta})^{-1}$ . With increasing  $\bar{\beta}$   
382 in the interval  $0 < \bar{\beta} < 1$ , the value  $\gamma$  is increase monotonically and  $\gamma \rightarrow \infty$  for  $\bar{\beta} \rightarrow 1$ . For real  
383 average values  $\bar{\beta}$  in the central PS, we get  $\gamma \sim 3.5-7.0$  ( $\gamma \sim 4.3$  at  $\bar{\beta} \sim 0.7$ ).

384 Spectra with power-law tail and quasi-exponential segment at lower energies can be generated  
385 when the value  $\Delta B/\bar{B}$  for magnetic irregularities is proportional to their size  $\delta r$  and the spectral  
386 density of irregularities is decrease rapidly with increasing  $\delta r$  for  $\delta r < r_s$ , but for  $\delta r > r_s$  it remains  
387 almost unchanged. Apparently, the spectra of magnetic irregularities in PS with thickness  $r_s$  have  
388 just such form. Then the lower boundary  $\mu_b$  of the power-law tail is corresponded to the condition  
389  $r_s/\rho_i \sim 10$  ( $\rho_i$  is the gyroradius of ions), i.e.  $\mu_b \sim 0.02(Q_i^2/M_i)B_s r_s^2$  keV nT<sup>-1</sup>, where  $B_s$  is the average  
390 magnetic field induction in the PS (in nT) and  $r_s$  is normalized to the Earth's radius. Believing that  
391  $B_s \sim 30$  nT and  $r_s \sim 1.3 R_E$  it can be obtained:  $\mu_b \sim 1.0(Q_i^2/M_i)$  keV nT<sup>-1</sup>.

392 The energy spectra of ions in the radiation belts of such planets as Jupiter and Saturn have the  
393 form analogous to the form of ion spectra in the ERB (see, e.g., Krimigis et al., 1981; Cheng et al.,  
394 1985). As that in the ERB, these spectra have a long power-law tail, which is formed, apparently,  
395 by mechanisms of stochastic acceleration of ions as a result of interactions of these ions with the  
396 current layer of the magnetospheric tail.

## 397 5 Conclusions

398 There are analyzed the experimental results for the stationary fluxes of the main ion components of  
399 the ERB (protons, helium ions and ions of the CNO group) in the near equatorially plane. It is  
400 found that in the outer belt these fluxes line up in the certain regular patterns in the space  $\{E, L\}$ .  
401 The degree of such similarity is increase with increasing  $E$  and  $L$ . The similarity of the spatial-  
402 energy distributions for various ionic components of the ERB is based on the main sources and on  
403 the universality mechanisms of transfer, acceleration and losses of ERB ions in the outer belt  
404 (radial diffusion while conserving  $\mu$  and  $K$  of ions, betatron acceleration and ionization losses).



405 Solar-cyclic (11-year) variations of the spatial-energy distributions of the ERB ion fluxes are  
406 investigated. It is found that the ERB ions fluxes are weakened with increasing solar activity and  
407 this effect increases with increasing atomic number  $Z$  of the ions. Such a dependence of the  
408 amplitude of flux changes on  $Z$  is typical also for faster variations in the fluxes of the ERB ions,  
409 during geomagnetic storms and other disturbances of the Earth's magnetosphere, what is  
410 underlined in the review Kovtyukh (2018).

411 The figures presented here make it possible to determine in which regions of the space  $\{E, L\}$   
412 near the equatorial plane the ionization losses of ions during their radial diffusion can be neglected  
413 and where this cannot be done. These results indicate also that with variations in the level of solar  
414 activity the coefficient  $D_{LL}$  of the radial diffusion of the ERB ions changes much less than the  
415 ionization losses rates of ions with  $Z \geq 2$ .

416 In addition, the figures given here reveal the localization of "white spots", especially extensive for  
417 ions with  $Z \geq 2$  and  $E > 1$  MeV/n at  $L < 3$ . The larger  $Z$  and energy of ions and the smaller  $L$  the  
418 greater the uncertainty in the values of the ERB fluxes. These gaps must be filled by the results of the  
419 future experiments on the satellites. Now the extensive gaps in the experimental data for fluxes of ions  
420 with  $Z \geq 2$  do not allow create the sufficiently complete and reliable empirical models of the ERB for  
421 these ions.

422

## 423 Acknowledgements.

424 **Financial support.** This work was supported by Russian Foundation for Basic Research RFFI  
425 grant No. 17-29-01022.

## 426 References

- 427 Alfvén, H., and Fälthammar, C.-G.: *Cosmical Electrodynamics, Fundamental Principles*,  
428 Clarendon Press, Oxford, 1963.
- 429 Albert, J. M., Ginet, G. P., and Gussenhoven, M. S.: CRRES observations of radiation belt protons,  
430 1, Data overview and steady state radial diffusion, *J. Geophys. Res.*, **103**(A5), 9261–9273.  
431 <https://doi.org/10.1029/97JA02869>, 1998.
- 432 Blake, J. B., and Fennell, J. F.: Heavy ion measurements in the synchronous altitude region, *Planet.*  
433 *Space Sci.*, **29**(11), 1205–1213, [https://doi.org/10.1016/0032.0633\(81\)90125-2](https://doi.org/10.1016/0032.0633(81)90125-2), 1981.
- 434 Blake, J. B., Fennell, J. F., Schulz, M., and Paulikas, G. A.: Geomagnetically trapped alpha  
435 particles, 2, The inner zone, *J. Geophys. Res.*, **78**(25), 5498–5506,  
436 <https://doi.org/10.1029/JA078i025p05498>, 1973.
- 437 Blanchard, R. C., and Hess, W. N.: Solar cycle changes in inner-zone protons, *J. Geophys. Res.*,  
438 **69**(19), 3927–3938, <https://doi.org/10.1029/JZ069i019p03927>, 1964.
- 439 Chenette, D. L., Blake, J. B., and Fennell, J. F.: The charge state composition of 0.4–MeV helium  
440 ions in the Earth's outer radiation belts during quiet times, *J. Geophys. Res.*, **89**(A9), 7551–  
441 7555, <https://doi.org/10.1029/JA089iA09p07551>, 1984.
- 442 Cheng, A. F., Krimigis, S. M., and Armstrong, T. P.: Near equality of ion phase space densities at  
443 Earth, Jupiter, and Saturn, *J. Geophys. Res.*, **90**(A9), 526–530,  
444 <http://doi.org/10.1029/JA090iA01p00526>, 1985.
- 445 Christon, S. P., Williams, D. J., Mitchell, D. G., Huang, C. Y., and Frank, L. A.: Spectral  
446 characteristics of plasma sheet ion and electron populations during disturbed geomagnetic  
447 conditions, *J. Geophys. Res.*, **96**(A1), 1–22, <https://doi.org/10.1029/90JA01633>, 1991.
- 448 Croley, D. R., Jr., Schulz, M., and Blake, J. B.: Radial diffusion of inner-zone protons:  
449 Observations and variational analysis, *J. Geophys. Res.*, **81**(4), 585–594,  
450 <https://doi.org/10.1029/JA081i004p00585>, 1976.
- 451 Dragt, A. J.: Solar cycle modulation of the radiation belt proton flux, *J. Geophys. Res.*, **76**(10),  
452 2313–2344, <https://doi.org/10.1029/JA076i010p02313>, 1971.



- 453 Fennell, J. F., and Blake, J. B.: Geomagnetically trapped  $\alpha$ -particles, *Magnetospheric Particles and*  
454 *Fields*, edited by: McCormac, B. M., D. Reidel, Dordrecht, Holland, 149–156, 1976.
- 455 Filz, R. C.: Comparison of the low-altitude inner-zone 55–MeV trapped proton fluxes measured in  
456 1965 and 1961–1962, *J. Geophys. Res.*, **72**(3), 959–963,  
457 <https://doi.org/10.1029/JZ072i003p00959>, 1967.
- 458 Freden, S. C., Blake, J. B., and Paulikas, G. A.: Spatial variation of the inner zone trapped proton  
459 spectrum, *J. Geophys. Res.*, **70**(13), 3113–3116, <https://doi.org/10.1029/JZ070i013p03113>,  
460 1965.
- 461 Fritz, T. A., and Spjeldvik, W. N.: Observations of energetic radiation belt helium ions at the  
462 geomagnetic equator during quiet conditions, *J. Geophys. Res.*, **83**(A6), 2579–2583,  
463 <https://doi.org/10.1029/JA083iA06p02579>, 1978.
- 464 Fritz, T. A., and Spjeldvik, W. N.: Simultaneous quiet time observations of energetic radiation belt  
465 protons and helium ions: The equatorial  $\alpha$ /p ratio near 1 MeV, *J. Geophys. Res.*, **84**(A6),  
466 2608–2618, <https://doi.org/10.1029/JA084iA06p02608>, 1979.
- 467 Fritz, T. A., and Spjeldvik, W. N.: Steady-state observations of geomagnetically trapped energetic  
468 heavy ions and their implications for theory, *Planet. Space Sci.*, **29**(11), 1169–1193,  
469 [https://doi.org/10.1016/0032-0633\(81\)90123-9](https://doi.org/10.1016/0032-0633(81)90123-9), 1981.
- 470 Ginzburg, V. L., and Syrovatskii, S. I.: *The Origin of Cosmic Rays*, Pergamon Press, Oxford,  
471 1964.
- 472 Ginat, G. P., O'Brien, T. P., Huston, S. L., Johnston, W. R., Guild, T. B., Friedel, R., Lindstrom,  
473 C. D., Roth, C. J., Whelan, P., Quinn, R. A., Madden, D., Morley, S., and Su, Yi-J.: AE9, AP9  
474 and SPM: New models for specifying the trapped energetic particle and space plasma  
475 environment, *Space Sci. Rev.*, **179**(1–4), 579–615, <https://doi.org/10.1007/s11214-013-9964-y>,  
476 2013.
- 477 Goka, T., Matsumoto, H., and Takagi, S.: Empirical model based on the measurements of the  
478 Japanese spacecrafts, *Radiation Measurements*, **30**(5), 617–624, [https://doi.org/10.1016/S1350-4487\(99\)00237-1](https://doi.org/10.1016/S1350-4487(99)00237-1), 1999.
- 480 Hess, W. N.: Discussion of paper by Pizzella, McIlwain, and Van Allen, 'Time variations of  
481 intensity in the Earth's inner radiation zone, October 1959 through December 1960', *J.*  
482 *Geophys. Res.*, **67**(12), 4886–4887, <https://doi.org/10.1029/JZ0670i012p04886>, 1962.
- 483 Hovestadt, D., Häusler, B., and Scholer, M.: Observation of energetic particles at very low  
484 altitudes near the geomagnetic equator, *Phys. Rev. Lett.*, **28**(20), 1340–1343,  
485 <https://doi.org/10.1103/PhysRevLett.28.1340>, 1972.
- 486 Hovestadt, D., Gloeckler, G., Fan, C. Y., Fisk, L. A., Ipavich, F.M., Klecker, B., O'Gallagher, J. J.,  
487 and Scholer, M.: Evidence for solar wind origin of energetic heavy ions in the Earth's radiation  
488 belt, *Geophys. Res. Lett.*, **5**(12), 1055–1057, <https://doi.org/10.1029/GL005i012p01055>, 1978.
- 489 Hovestadt, D., Klecker, B., Mitchell, E., Fennell, J. F., Gloeckler, G., and Fan, C. Y.: Spatial  
490 distribution of  $Z \geq 2$  ions in the outer radiation belt during quiet conditions, *Adv. Space Res.*,  
491 **1**(1), 305–308, [https://doi.org/10.1016/0273-1177\(81\)90125-3](https://doi.org/10.1016/0273-1177(81)90125-3), 1981.
- 492 Huston, S., Kuck, G., and Pfitzer, K.: Low-altitude trapped radiation model using TIROS/NOAA  
493 data, *Radiation Belts: Models and Standards*, edited by: Lemaire, J. F., Heynderickx, D., and  
494 Baker, D. N., AGU, Washington, D. C., 119–122, <https://doi.org/10.1029/GM097/p0119>, 1996.
- 495 Ilyin, B. D., Kuznetsov, S. N., Panasyuk, M. I., and Sosnovets, E.N.: Non-adiabatic effects and  
496 boundary of the trapped protons in the Earth's radiation belts, *Bulletin of the Russian Academy*  
497 *of Sciences: Physics*, **48**(11), 2200–2203, 1984.
- 498 Ipavich, F. M., Galvin, A. B., Gloeckler, G., Scholer, M., and Hovestadt D.: A statistical survey of  
499 ions observed upstream of the Earth's bow shock: Energy spectra, composition, and spatial  
500 variation, *J. Geophys. Res.*, **86**(A6), 4337–4342, <https://doi.org/10.1029/JA086iA06p4337>,  
501 1981a.



- 502 Ipavich, F. M., Scholer, M., and Gloeckler, G.: Temporal development of composition, spectra,  
503 and anisotropies during upstream particle events, *J. Geophys. Res.*, **86**(A13), 11153–11160,  
504 <https://doi.org/10.1029/JA086iA13p11153>, 1981b.
- 505 Kovtyukh, A. S.: Geocorona of hot plasma, *Cosmic Res.*, **39**(6), 527–558,  
506 <https://doi.org/10.1023/A:1013074126604>, 2001.
- 507 Kovtyukh, A. S.: Radial dependence of ionization losses of protons of the Earth's radiation belts,  
508 *Ann. Geophys.*, **34**(1), 17–28, <https://doi.org/10.5194/angeo-34-17-2016>, 2016a.
- 509 Kovtyukh, A. S.: Deduction of the rates of radial diffusion of protons from the structure of the  
510 Earth's radiation belts, *Ann. Geophys.*, **34**(11), 1085–1098. [https://doi.org/10.5194/angeo-34-1085-](https://doi.org/10.5194/angeo-34-1085-2016)  
511 [2016](https://doi.org/10.5194/angeo-34-1085-2016), 2016b.
- 512 Kovtyukh, A. S.: Ion Composition of the Earth's Radiation Belts in the Range from 100 keV to  
513 100 MeV/nucleon: Fifty Years of Research, *Space Sci. Rev.*, **214**(8), 124:1–124:30,  
514 <https://doi.org/10.1007/s11214-018-0560-z>, 2018.
- 515 Krimigis, S. M.: Alpha particles trapped in the Earth's magnetic field, *Particles and Fields in the*  
516 *Magnetosphere*, edited by: McCormac, B. M., D. Reidel, Dordrecht, Holland, 364–379, 1970.
- 517 Krimigis, S. M., Carbary, J. F., Keath, E. P., Bostrom, C. O., Axford, W. I., Gloeckler, G.,  
518 Lanzerotti, L. J., and Armstrong, T. P.: Characteristics of hot plasma in the Jovian  
519 magnetosphere: Results from the Voyager spacecraft, *J. Geophys. Res.*, **86**(A10), 8227–8257.  
520 <http://doi.org/10.1029/JA086iA10p08227>, 1981.
- 521 Kuznetsov, N. V., Nikolaeva, N. I., and Panasyuk, M. I.: Variation of the trapped proton flux in the  
522 inner radiation belt of the Earth as a function of solar activity, *Cosmic Res.*, **48**(1), 80–85,  
523 <https://doi.org/10.1134/S0010952510010065>, 2010.
- 524 Lui, A. T. Y., and Krimigis, S. M.: Several features of the earthward and tailward streaming of  
525 energetic protons (0.29–0.5 MeV) in the Earth's plasma sheet, *J. Geophys. Res.*, **86**(A13),  
526 11173–11188, <https://doi.org/10.1029/JA086iA13p11173>, 1981.
- 527 Lutsenko, V. N., and Nikolaeva, N. S.: Relative content and the range of alpha particles in the  
528 inner radiation belt of the Earth by measurements on satellite Prognoz-5, *Cosmic Res.*, **16**(3),  
529 459–462, 1978.
- 530 McIlwain, C. E.: Coordinate for mapping the distribution of magnetically trapped particles, *J.*  
531 *Geophys. Res.*, **66**(11), 3681–3691, <https://doi.org/10.1029/JZ066i011p03681>, 1961.
- 532 Milovanov, A. V., Zelenyi, L. M., and Zimbardo, G.: Fractal structures and power law spectra in  
533 the distant Earth's magnetotail, *J. Geophys. Res. Space Phys.*, **101**(A9), 19903–19910,  
534 <https://doi.org/10.1029/96JA01562>, 1996.
- 535 Nakano, G., and Heckman, H.: Evidence for solar-cycle changes in the inner-belt protons, *Phys.*  
536 *Rev. Lett.*, **20**(15), 806–809, <https://doi.org/10.1103/PhysRevLett.20.806>, 1968.
- 537 Northrop, T. G.: *The Adiabatic Motion of Charged Particles*, Wiley-Interscience, NY, USA, 1963.
- 538 Panasyuk, M. I., and Sosnovets, E. N.: Differential energy spectrum of low-energy protons in the  
539 inner region of the radiation belt, *Cosmic Res.*, **11**(3), 436–440, 1973.
- 540 Panasyuk, M. I., Reizman, S. Ya., Sosnovets, E. N., and Filatov, V. N.: Experimental results of  
541 protons and  $\alpha$ -particles measurements with energy more 1 MeV/nucleon in the radiation belts,  
542 *Cosmic Res.*, **15**(6), 887–894, 1977.
- 543 Pizzella, G., McIlwain, C. E., and Van Allen, J. A.: Time variations of intensity in the Earth's  
544 inner radiation zone, October 1959 through December 1960, *J. Geophys. Res.*, **67**(4), 1235–  
545 1253, <https://doi.org/10.1029/JZ0670i004p01235>, 1962.
- 546 Pizzella, G., and Randall, B. A.: Differential energy spectrum of geomagnetically trapped protons  
547 with the Injun 5 satellite, *J. Geophys. Res.*, **76**(10), 2306–2312,  
548 <https://doi.org/10.1029/JA076i010p02306>, 1971.
- 549 Qin, M., Zhang, X., Ni, B., Song, H., Zou, H., and Sun, Y.: Solar cycle variations of trapped  
550 proton flux in the inner radiation belt, *J. Geophys. Res. Space Phys.*, **119**(12), 9658–9669,  
551 <https://doi.org/10.1002/2014JA020300>, 2014.



- 552 Sarris, E. T., Krimigis, S. M., Lui, A. T. Y., Ackerson, K. L., Frank, L. A., and Williams, D. J.:  
553 Relationship between energetic particles and plasmas in the distant plasma sheet, *Geophys. Res.*  
554 *Letts.*, **8**(4), 349–352, <https://doi.org/10.1029/GL008i004p0349>, 1981.
- 555 Schulz, M., and Lanzerotti, L. J.: *Particle Diffusion in the Radiation Belts*, Springer, NY, USA,  
556 1974.
- 557 Selesnick, R. S., Hudson, M. K., and Kress, B. T.: Injection and loss of inner radiation belt protons  
558 during solar proton events and magnetic storms, *J. Geophys. Res. Space Phys.*, **115**(A8),  
559 A08211, <https://doi.org/10.1029/2010JA015247>, 2010.
- 560 Selesnick, R. S., Baker, D. N., Jaynes, A. N., Li, X., Kanekal, S. G., Hudson, M. K., and Kress, B.  
561 T.: Observations of the inner radiation belt: CRAND and trapped solar protons, *J. Geophys.*  
562 *Res. Space Phys.*, **119**(8), 6541–6552, <https://doi.org/10.1002/2014JA020188>, 2014.
- 563 Selesnick, R. S., Baker, D. N., Kanekal, S. G., Hoxie, V. C., and Li, X.: Modeling the proton  
564 radiation belt with Van Allen Probes Relativistic Electron-Proton Telescope data, *J. Geophys.*  
565 *Res. Space Phys.*, **123**(1), 685–697, <https://doi.org/10.1002/2017JA024661>, 2018.
- 566 Spjeldvik, W. N.: Expected charge states of energetic ions in the magnetosphere, *Space Sci. Rev.*,  
567 **23**(3), 499–538, <https://doi.org/10.1007/BF00172252>, 1979.
- 568 Spjeldvik, W. N., and Fritz, T. A.: Quiet time observations of equatorially trapped  
569 megaelectronvolt radiation belt ions with nuclear charge  $Z \geq 4$ , *J. Geophys. Res.*, **83**(A9), 4401–  
570 4405, <https://doi.org/10.1029/JA083iA09p04401>, 1978.
- 571 Spjeldvik, W. N., and Fritz, T. A.: Observations of energetic helium ions in the Earth's radiation  
572 belts during a sequence of geomagnetic storms, *J. Geophys. Res.*, **86**(A4), 2317–2328,  
573 <https://doi.org/10.1029/JA086iA04p02317>, 1981.
- 574 Stevens, J. R., Martina, E. F., and White, R. S.: Proton energy distributions from 0.060 to 3.3 MeV  
575 at 6.6 Earth radii, *J. Geophys. Res.*, **75**(28), 5373–5385,  
576 <https://doi.org/10.1029/JA075i028p05373>, 1970.
- 577 Vacaresse, A., Boscher, D., Bourdarie, S., Blanc, M., and Sauvaud, J. A.: Modeling the high-  
578 energy proton belt, *J. Geophys. Res. Space Phys.*, **104**(A12), 28601–28613,  
579 <https://doi.org/10.1029/1999JA900411>, 1999.
- 580 Venkatesan, D., and Krimigis, S. M.: Observations of low-energy (0.3– to 1.8–MeV) differential  
581 spectrums of trapped protons, *J. Geophys. Res.*, **76**(31), 7618–7631,  
582 <https://doi.org/10.1029/JA076i031p07618>, 1971.
- 583 Vernov, S. N.: The Earth's radiation belts. In G. Bozóki, E. Gombosi, A. Sebastyén, A. Somogyi  
584 (Eds.), *Proc. 11<sup>th</sup> ICRC*, Budapest, 85–162, 1969.
- 585 Westphalen, H., and Spjeldvik, W.N.: On the energy dependence of the radial diffusion coefficient  
586 and spectra of inner radiation belt particles: Analytic solution and comparison with numerical  
587 results, *J. Geophys. Res.*, **87**(A10), 8321–8326, <https://doi.org/10.1029/2000JA087iA10p08321>,  
588 1982.
- 589 Wilken, B., Baker, D. N., Higbie, P. R., Fritz, T. A., Olson, W. P., and Pfitzer, K. A.:  
590 Magnetospheric configuration and energetic particle effects associated with a SSC: A case study  
591 of the CDAW 6 event on March 22, 1979, *J. Geophys. Res.*, **91**(A2), 1459–1473,  
592 <https://doi.org/10.1029/JA091iA02p01459>, 1986.
- 593 Williams, D. J.: Phase space variations of near equatorially mirroring ring current ions, *J. Geophys.*  
594 *Res.*, **86**(A1), 189–194, <https://doi.org/10.1029/JA086iA01p00189>, 1981.
- 595 Williams, D. J., and Frank, L. A.: Intense low-energy ion populations at low equatorial altitude, *J.*  
596 *Geophys. Res.*, **89**(A6), 3903–3911, <https://doi.org/10.1029/JA089iA06p03903>, 1984.
- 597

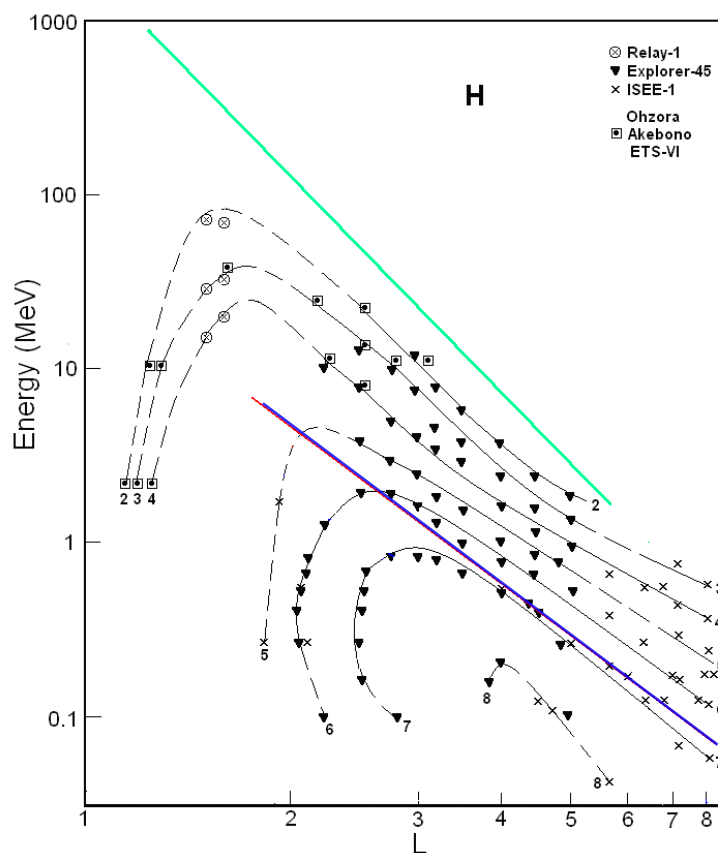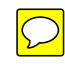

598  
 599 **Figure 1.** Proton fluxes in the ERB near minima of the solar activity. A numbers on the curves are equal the values of  
 600 the decimal logarithms of  $J$  where  $J$  is given in  $(\text{cm}^2 \text{ s ster MeV})^{-1}$ ; it is differential fluxes of protons with  $\alpha_0 \approx 90^\circ$   
 601 (near the plane of the geomagnetic equator). Data of satellites are presented by different symbols. The red line  
 602 corresponded to the lower boundary of the power-law tail of the proton spectra; green line corresponded to the  
 603 maximum energy of protons trapped in the ERB (Ilyin et al., 1984).

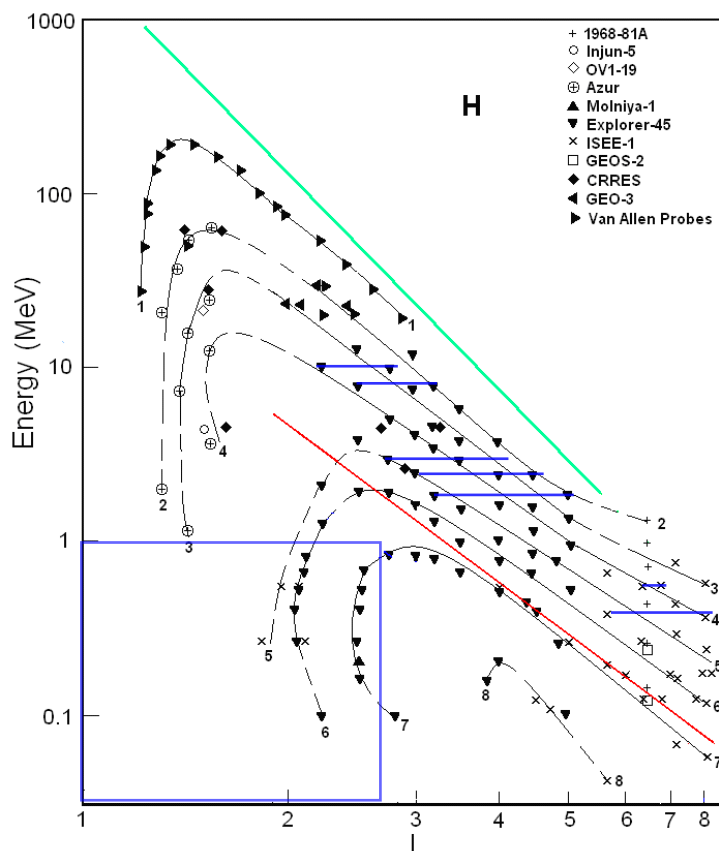

604  
 605 **Figure 2.** Proton fluxes in the ERB near maxima of the solar activity. A numbers on the curves are equal the values of  
 606 the decimal logarithms of  $J$  where  $J$  is given in  $(\text{cm}^2 \text{ s ster MeV})^{-1}$ ; it is differential fluxes of protons with  $\alpha_0 \approx 90^\circ$   
 607 (near the plane of the geomagnetic equator). Data of satellites are presented by different symbols. The red line  
 608 corresponded to the lower boundary of the power-law tail of the proton spectra; green line corresponded to the  
 609 maximum energy of protons trapped in the ERB (Ilyin et al., 1984).

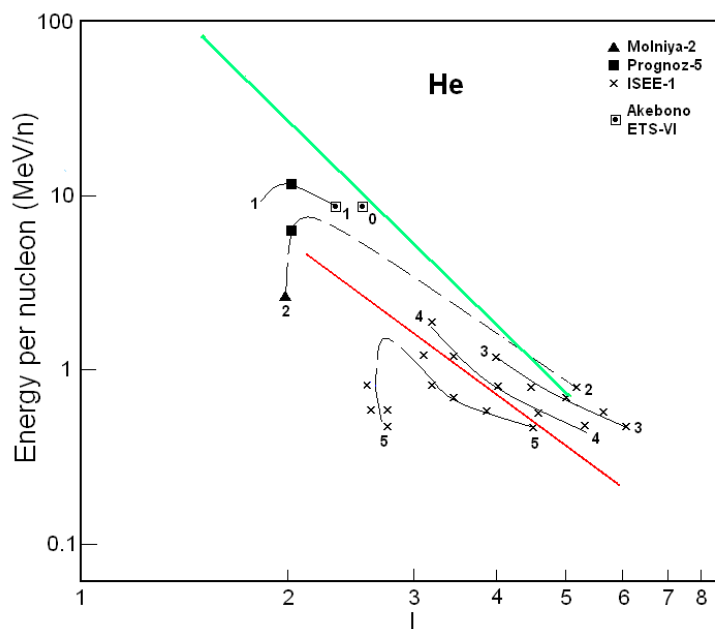

610  
 611 **Figure 3.** Helium ion fluxes in the ERB near minima of the solar activity. A numbers on the curves are equal the  
 612 values of the decimal logarithms of  $J$  where  $J$  is given in  $(\text{cm}^2 \text{ s ster MeV/n})^{-1}$ ; it is differential flux of protons with  $\alpha_0$   
 613  $\approx 90^\circ$  (near the plane of the geomagnetic equator). Data of satellites are presented by different symbols. The red line  
 614 corresponded to the lower boundary of the power-law tail of the helium spectra; green line corresponded to the  
 615 maximum energy of these ions trapped in the ERB (Ilyin et al., 1984).

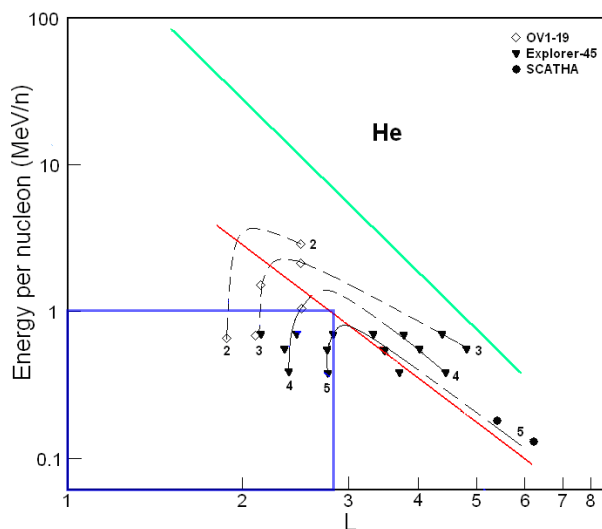

616  
 617 **Figure 4.** Helium ion fluxes in the ERB near maxima of the solar activity. A numbers on the curves are equal the value  
 618 of the decimal logarithms of  $J$  where  $J$  is given in  $(\text{cm}^2 \text{ s ster MeV/n})^{-1}$ ; it is differential flux of protons with  $\alpha_0 \approx 90^\circ$   
 619 (near the plane of the geomagnetic equator). Data of satellites are presented by different symbols. The red line  
 620 corresponded to the lower boundary of the power-law tail of the helium spectra; green line corresponded to the  
 621 maximum energy of these ions trapped in the ERB (Ilyin et al., 1984).



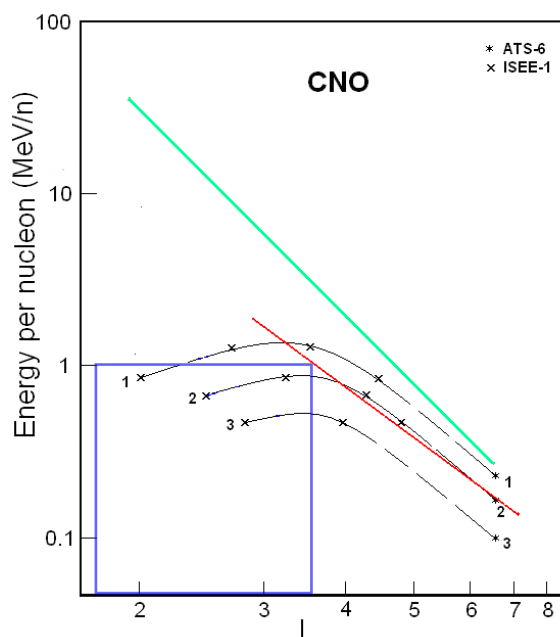

622  
 623 **Figure 5.** CNO ion fluxes in the ERB near minima of the solar activity. A numbers on the curves are equal the values  
 624 of the decimal logarithms of  $J$  where  $J$  is given in  $(\text{cm}^2 \text{ s ster MeV/n})^{-1}$ ; it is differential flux of protons with  $\alpha_0 \approx 90^\circ$   
 625 (near the plane of the geomagnetic equator). Data of satellites are presented by different symbols. The red line  
 626 corresponded to the lower boundary of the power-law tail of the CNO ion spectra; green line corresponded to the  
 627 maximum energy of these ions trapped in the ERB (Ilyin et al., 1984).

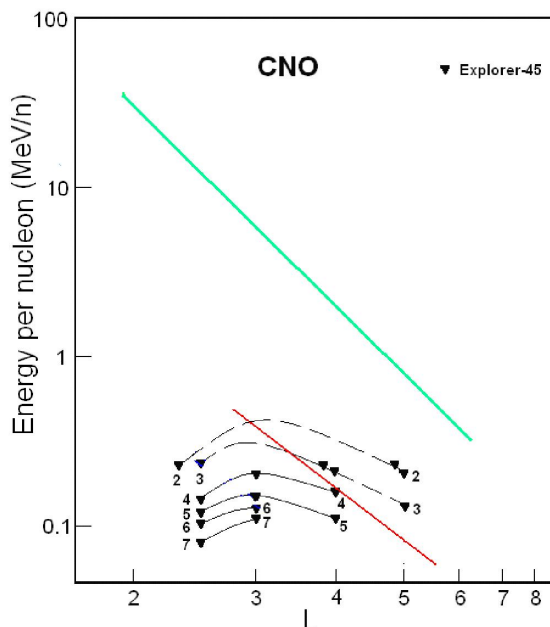

628  
 629 **Figure 6.** CNO ion fluxes in the ERB near the maximum of the solar activity. A numbers on the curves are equal the  
 630 values of the decimal logarithms of  $J$  where  $J$  is given in  $(\text{cm}^2 \text{ s ster MeV/n})^{-1}$ ; it is differential flux of protons with  $\alpha_0$   
 631  $\approx 90^\circ$  (near the plane of the geomagnetic equator). Data of satellites are presented by different symbols. The red line  
 632 corresponded to the lower boundary of the power-law tail of the CNO ion spectra; green line corresponded to the  
 633 maximum energy of these ions trapped in the ERB (Ilyin et al., 1984).
